# Supplementary material for: Insight into magnetically induced ring currents and photophysics of six-porphyrin nanorings
Source: Royal Society of Chemistry journal article supplement (doi:10.1039/d4cp02547d), 2024-01-01
Supplement: d4cp02547d1.pdf [file d4cp02547d1.pdf]

Supporting Information for

Insight into Magnetically Induced Ring-Currents and Photophysics of Nanorings

Lenara I. Valiulina, Victor N. Cherepanov and Kirill Khoroshkin

Department of Optics and Spectroscopy, Tomsk State University, Tomsk, 634050, Russia.

Correspondence to: [valiulina.lenara.01.01.1998@gmail.com](mailto:valiulina.lenara.01.01.1998@gmail.com)

The Cartesian coordinates of the optimized molecular structures at the BHandHLYP/def2-SVP level of theory:

| <b>c-P6</b> |                  |                  | <b>c-P6<sup>2+</sup></b> |    |                  |                  |                 |
|-------------|------------------|------------------|--------------------------|----|------------------|------------------|-----------------|
| C           | -12.593488000000 | 2.790639000000   | 1.249501000000           | C  | -12.583610000000 | 2.789131000000   | 1.256685000000  |
| C           | -12.580595000000 | 3.460322000000   | 2.524201000000           | C  | -12.588615000000 | 3.460977000000   | 2.527627000000  |
| C           | -12.732090000000 | 2.500353000000   | 3.468377000000           | C  | -12.749609000000 | 2.500026000000   | 3.471295000000  |
| C           | -12.809575000000 | 1.243931000000   | 2.773679000000           | C  | -12.814262000000 | 1.246018000000   | 2.775578000000  |
| N           | -12.739831000000 | 1.459317000000   | 1.433550000000           | N  | -12.726928000000 | 1.460866000000   | 1.435069000000  |
| H           | -12.475913000000 | 4.525658000000   | 2.663649000000           | H  | -12.494379000000 | 4.526832000000   | 2.669918000000  |
| H           | -12.772934000000 | 2.622199000000   | 4.541812000000           | H  | -12.808586000000 | 2.623172000000   | 4.543594000000  |
| C           | -12.870342000000 | 0.000000000000   | 3.389917000000           | C  | -12.881595000000 | 0.000000000000   | 3.388296000000  |
| C           | -12.809575000000 | -1.243931000000  | 2.773679000000           | C  | -12.814262000000 | -1.246018000000  | 2.775578000000  |
| C           | -12.732090000000 | -2.500353000000  | 3.468377000000           | C  | -12.749609000000 | -2.500026000000  | 3.471295000000  |
| N           | -12.739831000000 | -1.459317000000  | 1.433550000000           | N  | -12.726928000000 | -1.460866000000  | 1.435069000000  |
| C           | -12.580595000000 | -3.460322000000  | 2.524201000000           | C  | -12.588615000000 | -3.460977000000  | 2.527627000000  |
| H           | -12.772934000000 | -2.622199000000  | 4.541812000000           | H  | -12.808586000000 | -2.623172000000  | 4.543594000000  |
| C           | -12.593488000000 | -2.790639000000  | 1.249501000000           | C  | -12.583610000000 | -2.789131000000  | 1.256685000000  |
| H           | -12.475913000000 | -4.525658000000  | 2.663649000000           | H  | -12.494379000000 | -4.526832000000  | 2.669918000000  |
| C           | -12.467162000000 | -3.432366000000  | 0.000000000000           | C  | -12.445041000000 | -3.430514000000  | 0.000000000000  |
| C           | -12.593488000000 | -2.790639000000  | -1.249501000000          | C  | -12.583610000000 | -2.789131000000  | -1.256685000000 |
| C           | -12.580595000000 | -3.460322000000  | -2.524201000000          | C  | -12.588615000000 | -3.460977000000  | -2.527627000000 |
| N           | -12.739831000000 | -1.459317000000  | -1.433550000000          | N  | -12.726928000000 | -1.460866000000  | -1.435069000000 |
| C           | -12.732090000000 | -2.500353000000  | -3.468377000000          | C  | -12.749609000000 | -2.500026000000  | -3.471295000000 |
| H           | -12.475913000000 | -4.525658000000  | -2.663649000000          | H  | -12.494379000000 | -4.526832000000  | -2.669918000000 |
| C           | -12.809575000000 | -1.243931000000  | -2.773679000000          | C  | -12.814262000000 | -1.246018000000  | -2.775578000000 |
| H           | -12.772934000000 | -2.622199000000  | -4.541812000000          | H  | -12.808586000000 | -2.623172000000  | -4.543594000000 |
| C           | -12.870342000000 | 0.000000000000   | -3.389917000000          | C  | -12.881595000000 | 0.000000000000   | -3.388296000000 |
| C           | -12.809575000000 | 1.243931000000   | -2.773679000000          | C  | -12.814262000000 | 1.246018000000   | -2.775578000000 |
| C           | -12.732090000000 | 2.500353000000   | -3.468377000000          | C  | -12.749609000000 | 2.500026000000   | -3.471295000000 |
| N           | -12.739831000000 | 1.459317000000   | -1.433550000000          | N  | -12.726928000000 | 1.460866000000   | -1.435069000000 |
| C           | -12.580595000000 | 3.460322000000   | -2.524201000000          | C  | -12.588615000000 | 3.460977000000   | -2.527627000000 |
| H           | -12.772934000000 | 2.622199000000   | -4.541812000000          | H  | -12.808586000000 | 2.623172000000   | -4.543594000000 |
| C           | -12.593488000000 | 2.790639000000   | -1.249501000000          | C  | -12.583610000000 | 2.789131000000   | -1.256685000000 |
| H           | -12.475913000000 | 4.525658000000   | -2.663649000000          | H  | -12.494379000000 | 4.526832000000   | -2.669918000000 |
| C           | -12.467162000000 | 3.432366000000   | 0.000000000000           | C  | -12.445041000000 | 3.430514000000   | 0.000000000000  |
| Zn          | -12.751320000000 | 0.000000000000   | 0.000000000000           | Zn | -12.743192000000 | 0.000000000000   | 0.000000000000  |
| C           | -12.091855000000 | 4.802241000000   | 0.000000000000           | C  | -12.059864000000 | 4.782665000000   | 0.000000000000  |
| C           | -11.621585000000 | 5.919906000000   | 0.000000000000           | C  | -11.577088000000 | 5.900884000000   | 0.000000000000  |
| C           | -12.091855000000 | -4.802241000000  | 0.000000000000           | C  | -12.059864000000 | -4.782665000000  | 0.000000000000  |
| C           | -11.621585000000 | -5.919906000000  | 0.000000000000           | C  | -11.577088000000 | -5.900884000000  | 0.000000000000  |
| C           | -6.434913000000  | -11.143962000000 | -3.389945000000          | C  | -6.440222000000  | -11.152640000000 | -3.388352000000 |
| C           | -5.327162000000  | -11.713065000000 | -2.773698000000          | C  | -5.327375000000  | -11.717045000000 | -2.775612000000 |
| C           | -7.481973000000  | -10.469685000000 | -2.773700000000          | C  | -7.485855000000  | -10.471741000000 | -2.775633000000 |
| C           | -4.200160000000  | -12.273847000000 | -3.468383000000          | C  | -4.208823000000  | -12.287625000000 | -3.471314000000 |
| N           | -5.105785000000  | -11.760344000000 | -1.433563000000          | N  | -5.097720000000  | -11.748876000000 | -1.435092000000 |
| C           | -8.531473000000  | -9.774586000000  | -3.468383000000          | C  | -8.539718000000  | -9.789020000000  | -3.471330000000 |
| N           | -7.633695000000  | -10.301692000000 | -1.433566000000          | N  | -7.628359000000  | -10.288842000000 | -1.435108000000 |
| C           | -3.292978000000  | -12.622406000000 | -2.524200000000          | C  | -3.296059000000  | -12.628457000000 | -2.527624000000 |
| H           | -4.115016000000  | -12.370088000000 | -4.541820000000          | H  | -4.131571000000  | -12.400143000000 | -4.543620000000 |
| C           | -3.879501000000  | -12.298919000000 | -1.249503000000          | C  | -3.875581000000  | -12.288505000000 | -1.256688000000 |
| Zn          | -6.375493000000  | -11.040966000000 | 0.000000000000           | Zn | -6.371162000000  | -11.032894000000 | 0.000000000000  |
| C           | -9.287235000000  | -9.163612000000  | -2.524198000000          | C  | -9.291657000000  | -9.169438000000  | -2.527640000000 |
| H           | -8.657401000000  | -9.749019000000  | -4.541821000000          | H  | -8.675803000000  | -9.778474000000  | -4.543635000000 |
| C           | -8.713657000000  | -9.509534000000  | -1.249502000000          | C  | -8.707254000000  | -9.500942000000  | -1.256699000000 |
| H           | -2.317907000000  | -13.064152000000 | -2.663641000000          | H  | -2.325728000000  | -13.079443000000 | -2.669901000000 |
| C           | -3.260508000000  | -12.510256000000 | 0.000000000000           | C  | -3.250743000000  | -12.489117000000 | 0.000000000000  |
| N           | -7.633695000000  | -10.301692000000 | 1.433566000000           | N  | -7.628359000000  | -10.288842000000 | 1.435108000000  |
| N           | -5.105785000000  | -11.760344000000 | 1.433563000000           | N  | -5.097720000000  | -11.748876000000 | 1.435092000000  |
| H           | -10.157638000000 | -8.540475000000  | -2.663641000000          | H  | -10.167777000000 | -8.555154000000  | -2.669912000000 |
| C           | -9.206385000000  | -9.079380000000  | 0.000000000000           | C  | -9.193671000000  | -9.060402000000  | 0.000000000000  |

|    |                  |                  |                 |    |                  |                  |                 |
|----|------------------|------------------|-----------------|----|------------------|------------------|-----------------|
| C  | -3.879501000000  | -12.298919000000 | 1.249503000000  | C  | -3.875581000000  | -12.288505000000 | 1.256688000000  |
| C  | -1.886475000000  | -12.869820000000 | 0.000000000000  | C  | -1.887143000000  | -12.831251000000 | 0.000000000000  |
| C  | -8.713657000000  | -9.509534000000  | 1.249502000000  | C  | -8.707254000000  | -9.500942000000  | 1.256699000000  |
| C  | -7.481973000000  | -10.469685000000 | 2.773700000000  | C  | -7.485855000000  | -10.471741000000 | 2.775633000000  |
| C  | -5.327162000000  | -11.713065000000 | 2.773698000000  | C  | -5.327375000000  | -11.717045000000 | 2.775612000000  |
| C  | -10.205187000000 | -8.069577000000  | 0.000000000000  | C  | -10.172273000000 | -8.051040000000  | 0.000000000000  |
| C  | -3.292978000000  | -12.622406000000 | 2.524200000000  | C  | -3.296059000000  | -12.628457000000 | 2.527624000000  |
| C  | -0.683406000000  | -13.021394000000 | 0.000000000000  | C  | -0.677339000000  | -12.972181000000 | 0.000000000000  |
| C  | -9.287235000000  | -9.163612000000  | 2.524198000000  | C  | -9.291657000000  | -9.169438000000  | 2.527640000000  |
| C  | -8.531473000000  | -9.774586000000  | 3.468383000000  | C  | -8.539718000000  | -9.789020000000  | 3.471330000000  |
| C  | -6.434913000000  | -11.143962000000 | 3.389945000000  | C  | -6.440222000000  | -11.152640000000 | 3.388352000000  |
| C  | -4.200160000000  | -12.273847000000 | 3.468383000000  | C  | -4.208823000000  | -12.287625000000 | 3.471314000000  |
| C  | -10.938082000000 | -7.103559000000  | 0.000000000000  | C  | -10.899529000000 | -7.074011000000  | 0.000000000000  |
| H  | -2.317907000000  | -13.064152000000 | 2.663641000000  | H  | -2.325728000000  | -13.079443000000 | 2.669901000000  |
| H  | -10.157638000000 | -8.540475000000  | 2.663641000000  | H  | -10.167777000000 | -8.555154000000  | 2.669912000000  |
| H  | -8.657401000000  | -9.749019000000  | 4.541821000000  | H  | -8.675803000000  | -9.778474000000  | 4.543635000000  |
| H  | -4.115016000000  | -12.370088000000 | 4.541820000000  | H  | -4.131571000000  | -12.400143000000 | 4.543620000000  |
| C  | 10.938082000000  | -7.103559000000  | 0.000000000000  | C  | 10.899529000000  | -7.074011000000  | 0.000000000000  |
| C  | 11.621585000000  | -5.919906000000  | 0.000000000000  | C  | 11.577088000000  | -5.900884000000  | 0.000000000000  |
| C  | 10.205187000000  | -8.069577000000  | 0.000000000000  | C  | 10.172273000000  | -8.051040000000  | 0.000000000000  |
| C  | 12.091855000000  | -4.802241000000  | 0.000000000000  | C  | 12.059864000000  | -4.782665000000  | 0.000000000000  |
| C  | 9.206385000000   | -9.079380000000  | 0.000000000000  | C  | 9.193671000000   | -9.060402000000  | 0.000000000000  |
| C  | 12.467162000000  | -3.432366000000  | 0.000000000000  | C  | 12.445041000000  | -3.430514000000  | 0.000000000000  |
| C  | 8.713657000000   | -9.509534000000  | -1.249502000000 | C  | 8.707254000000   | -9.500942000000  | -1.256699000000 |
| C  | 8.713657000000   | -9.509534000000  | 1.249502000000  | C  | 8.707254000000   | -9.500942000000  | 1.256699000000  |
| C  | 12.593488000000  | -2.790639000000  | -1.249501000000 | C  | 12.583610000000  | -2.789131000000  | -1.256685000000 |
| C  | 12.593488000000  | -2.790639000000  | 1.249501000000  | C  | 12.583610000000  | -2.789131000000  | 1.256685000000  |
| C  | 9.287235000000   | -9.163612000000  | -2.524198000000 | C  | 9.291657000000   | -9.169438000000  | -2.527640000000 |
| N  | 7.633695000000   | -10.301692000000 | -1.433566000000 | N  | 7.628359000000   | -10.288842000000 | -1.435108000000 |
| C  | 9.287235000000   | -9.163612000000  | 2.524198000000  | C  | 9.291657000000   | -9.169438000000  | 2.527640000000  |
| N  | 7.633695000000   | -10.301692000000 | 1.433566000000  | N  | 7.628359000000   | -10.288842000000 | 1.435108000000  |
| N  | 12.739831000000  | -1.459317000000  | -1.433550000000 | N  | 12.726928000000  | -1.460866000000  | -1.435069000000 |
| C  | 12.580595000000  | -3.460322000000  | -2.524201000000 | C  | 12.588615000000  | -3.460977000000  | -2.527627000000 |
| N  | 12.739831000000  | -1.459317000000  | 1.433550000000  | N  | 12.726928000000  | -1.460866000000  | 1.435069000000  |
| C  | 12.580595000000  | -3.460322000000  | 2.524201000000  | C  | 12.588615000000  | -3.460977000000  | 2.527627000000  |
| C  | 8.531473000000   | -9.774586000000  | -3.468383000000 | C  | 8.539718000000   | -9.789020000000  | -3.471330000000 |
| H  | 10.157638000000  | -8.540475000000  | -2.663641000000 | H  | 10.167777000000  | -8.555154000000  | -2.669912000000 |
| C  | 7.481973000000   | -10.469685000000 | -2.773700000000 | C  | 7.485855000000   | -10.471741000000 | -2.775633000000 |
| Zn | 6.375493000000   | -11.040966000000 | 0.000000000000  | Zn | 6.371162000000   | -11.032894000000 | 0.000000000000  |
| C  | 8.531473000000   | -9.774586000000  | 3.468383000000  | C  | 8.539718000000   | -9.789020000000  | 3.471330000000  |
| H  | 10.157638000000  | -8.540475000000  | 2.663641000000  | H  | 10.167777000000  | -8.555154000000  | 2.669912000000  |
| C  | 7.481973000000   | -10.469685000000 | 2.773700000000  | C  | 7.485855000000   | -10.471741000000 | 2.775633000000  |
| C  | 12.809575000000  | -1.243931000000  | -2.773679000000 | C  | 12.814262000000  | -1.246018000000  | -2.775578000000 |
| Zn | 12.751320000000  | 0.000000000000   | 0.000000000000  | Zn | 12.743192000000  | 0.000000000000   | 0.000000000000  |
| C  | 12.732090000000  | -2.500353000000  | -3.468377000000 | C  | 12.749609000000  | -2.500026000000  | -3.471295000000 |
| H  | 12.475913000000  | -4.525658000000  | -2.663649000000 | H  | 12.494379000000  | -4.526832000000  | -2.669918000000 |
| C  | 12.809575000000  | -1.243931000000  | 2.773679000000  | C  | 12.814262000000  | -1.246018000000  | 2.775578000000  |
| C  | 12.732090000000  | -2.500353000000  | 3.468377000000  | C  | 12.749609000000  | -2.500026000000  | 3.471295000000  |
| H  | 12.475913000000  | -4.525658000000  | 2.663649000000  | H  | 12.494379000000  | -4.526832000000  | 2.669918000000  |
| H  | 8.657401000000   | -9.749019000000  | -4.541821000000 | H  | 8.675803000000   | -9.778474000000  | -4.543635000000 |
| C  | 6.434913000000   | -11.143962000000 | -3.389945000000 | C  | 6.440222000000   | -11.152640000000 | -3.388352000000 |
| N  | 5.105785000000   | -11.760344000000 | -1.433563000000 | N  | 5.097720000000   | -11.748876000000 | -1.435092000000 |
| N  | 5.105785000000   | -11.760344000000 | 1.433563000000  | N  | 5.097720000000   | -11.748876000000 | 1.435092000000  |
| H  | 8.657401000000   | -9.749019000000  | 4.541821000000  | H  | 8.675803000000   | -9.778474000000  | 4.543635000000  |
| C  | 6.434913000000   | -11.143962000000 | 3.389945000000  | C  | 6.440222000000   | -11.152640000000 | 3.388352000000  |
| C  | 12.870342000000  | 0.000000000000   | -3.389917000000 | C  | 12.881595000000  | 0.000000000000   | -3.388296000000 |
| N  | 12.739831000000  | 1.459317000000   | -1.433550000000 | N  | 12.726928000000  | 1.460866000000   | -1.435069000000 |
| N  | 12.739831000000  | 1.459317000000   | 1.433550000000  | N  | 12.726928000000  | 1.460866000000   | 1.435069000000  |
| H  | 12.772934000000  | -2.622199000000  | -4.541812000000 | H  | 12.808586000000  | -2.623172000000  | -4.543594000000 |
| C  | 12.870342000000  | 0.000000000000   | 3.389917000000  | C  | 12.881595000000  | 0.000000000000   | 3.388296000000  |
| H  | 12.772934000000  | -2.622199000000  | 4.541812000000  | H  | 12.808586000000  | -2.623172000000  | 4.543594000000  |
| C  | 5.327162000000   | -11.713065000000 | -2.773698000000 | C  | 5.327375000000   | -11.717045000000 | -2.775612000000 |
| C  | 3.879501000000   | -12.298919000000 | -1.249503000000 | C  | 3.875581000000   | -12.288505000000 | -1.256688000000 |
| C  | 5.327162000000   | -11.713065000000 | 2.773698000000  | C  | 5.327375000000   | -11.717045000000 | 2.775612000000  |
| C  | 3.879501000000   | -12.298919000000 | 1.249503000000  | C  | 3.875581000000   | -12.288505000000 | 1.256688000000  |
| C  | 12.809575000000  | 1.243931000000   | -2.773679000000 | C  | 12.814262000000  | 1.246018000000   | -2.775578000000 |
| C  | 12.593488000000  | 2.790639000000   | -1.249501000000 | C  | 12.583610000000  | 2.789131000000   | -1.256685000000 |
| C  | 12.593488000000  | 2.790639000000   | 1.249501000000  | C  | 12.583610000000  | 2.789131000000   | 1.256685000000  |
| C  | 12.809575000000  | 1.243931000000   | 2.773679000000  | C  | 12.814262000000  | 1.246018000000   | 2.775578000000  |
| C  | 4.200160000000   | -12.273847000000 | -3.468383000000 | C  | 4.208823000000   | -12.287625000000 | -3.471314000000 |
| C  | 3.292978000000   | -12.622406000000 | -2.524200000000 | C  | 3.296059000000   | -12.628457000000 | -2.527624000000 |
| C  | 3.260508000000   | -12.510256000000 | 0.000000000000  | C  | 3.250743000000   | -12.489117000000 | 0.000000000000  |
| C  | 4.200160000000   | -12.273847000000 | 3.468383000000  | C  | 4.208823000000   | -12.287625000000 | 3.471314000000  |
| C  | 3.292978000000   | -12.622406000000 | 2.524200000000  | C  | 3.296059000000   | -12.628457000000 | 2.527624000000  |

|    |                 |                  |                 |    |                 |                  |                 |
|----|-----------------|------------------|-----------------|----|-----------------|------------------|-----------------|
| C  | 12.732090000000 | 2.500353000000   | -3.468377000000 | C  | 12.749609000000 | 2.500026000000   | -3.471295000000 |
| C  | 12.580595000000 | 3.460322000000   | -2.524201000000 | C  | 12.588615000000 | 3.460977000000   | -2.527627000000 |
| C  | 12.467162000000 | 3.432366000000   | 0.000000000000  | C  | 12.445041000000 | 3.430514000000   | 0.000000000000  |
| C  | 12.580595000000 | 3.460322000000   | 2.524201000000  | C  | 12.588615000000 | 3.460977000000   | 2.527627000000  |
| C  | 12.732090000000 | 2.500353000000   | 3.468377000000  | C  | 12.749609000000 | 2.500026000000   | 3.471295000000  |
| H  | 4.115016000000  | -12.370088000000 | -4.541820000000 | H  | 4.131571000000  | -12.400143000000 | -4.543620000000 |
| H  | 2.317907000000  | -13.064152000000 | -2.663641000000 | H  | 2.325728000000  | -13.079443000000 | -2.669901000000 |
| C  | 1.886475000000  | -12.869892000000 | 0.000000000000  | C  | 1.887143000000  | -12.831251000000 | 0.000000000000  |
| H  | 4.115016000000  | -12.370088000000 | 4.541820000000  | H  | 4.131571000000  | -12.400143000000 | 4.543620000000  |
| H  | 2.317907000000  | -13.064152000000 | 2.663641000000  | H  | 2.325728000000  | -13.079443000000 | 2.669901000000  |
| H  | 12.772934000000 | 2.622199000000   | -4.541812000000 | H  | 12.808586000000 | 2.623172000000   | -4.543594000000 |
| H  | 12.475913000000 | 4.525658000000   | -2.663649000000 | H  | 12.494379000000 | 4.526832000000   | -2.669918000000 |
| C  | 12.091855000000 | 4.802241000000   | 0.000000000000  | C  | 12.059864000000 | 4.782665000000   | 0.000000000000  |
| H  | 12.475913000000 | 4.525658000000   | 2.663649000000  | H  | 12.494379000000 | 4.526832000000   | 2.669918000000  |
| H  | 12.772934000000 | 2.622199000000   | 4.541812000000  | H  | 12.808586000000 | 2.623172000000   | 4.543594000000  |
| C  | 0.683406000000  | -13.021394000000 | 0.000000000000  | C  | 0.677339000000  | -12.972181000000 | 0.000000000000  |
| C  | 11.621585000000 | 5.919906000000   | 0.000000000000  | C  | 11.577088000000 | 5.900884000000   | 0.000000000000  |
| C  | 10.938082000000 | 7.103559000000   | 0.000000000000  | C  | 10.899529000000 | 7.074011000000   | 0.000000000000  |
| C  | 10.205187000000 | 8.069577000000   | 0.000000000000  | C  | 10.172273000000 | 8.051040000000   | 0.000000000000  |
| C  | 9.206385000000  | 9.079380000000   | 0.000000000000  | C  | 9.193671000000  | 9.060402000000   | 0.000000000000  |
| C  | 8.713657000000  | 9.509534000000   | 1.249502000000  | C  | 8.707254000000  | 9.500942000000   | 1.256699000000  |
| C  | 8.713657000000  | 9.509534000000   | -1.249502000000 | C  | 8.707254000000  | 9.500942000000   | -1.256699000000 |
| C  | 9.287235000000  | 9.163612000000   | 2.524198000000  | C  | 9.291657000000  | 9.169438000000   | 2.527640000000  |
| N  | 7.633695000000  | 10.301692000000  | 1.433566000000  | N  | 7.628359000000  | 10.288842000000  | 1.435108000000  |
| N  | 7.633695000000  | 10.301692000000  | -1.433566000000 | N  | 7.628359000000  | 10.288842000000  | -1.435108000000 |
| C  | 9.287235000000  | 9.163612000000   | -2.524198000000 | C  | 9.291657000000  | 9.169438000000   | -2.527640000000 |
| C  | 8.531473000000  | 9.774586000000   | 3.468383000000  | C  | 8.539718000000  | 9.789020000000   | 3.471330000000  |
| H  | 10.157638000000 | 8.540475000000   | 2.663641000000  | H  | 10.167777000000 | 8.555154000000   | 2.669912000000  |
| C  | 7.481973000000  | 10.469685000000  | 2.773700000000  | C  | 7.485855000000  | 10.471741000000  | 2.775633000000  |
| Zn | 6.375493000000  | 11.040966000000  | 0.000000000000  | Zn | 6.371162000000  | 11.032894000000  | 0.000000000000  |
| C  | 7.481973000000  | 10.469685000000  | -2.773700000000 | C  | 7.485855000000  | 10.471741000000  | -2.775633000000 |
| C  | 8.531473000000  | 9.774586000000   | -3.468383000000 | C  | 8.539718000000  | 9.789020000000   | -3.471330000000 |
| H  | 10.157638000000 | 8.540475000000   | -2.663641000000 | H  | 10.167777000000 | 8.555154000000   | -2.669912000000 |
| H  | 8.657401000000  | 9.749019000000   | 4.541821000000  | H  | 8.675803000000  | 9.778474000000   | 4.543635000000  |
| C  | 6.434913000000  | 11.143962000000  | 3.389945000000  | C  | 6.440222000000  | 11.152640000000  | 3.388352000000  |
| N  | 5.105785000000  | 11.760344000000  | 1.433563000000  | N  | 5.097720000000  | 11.748876000000  | 1.435092000000  |
| N  | 5.105785000000  | 11.760344000000  | -1.433563000000 | N  | 5.097720000000  | 11.748876000000  | -1.435092000000 |
| C  | 6.434913000000  | 11.143962000000  | -3.389945000000 | C  | 6.440222000000  | 11.152640000000  | -3.388352000000 |
| H  | 8.657401000000  | 9.749019000000   | -4.541821000000 | H  | 8.675803000000  | 9.778474000000   | -4.543635000000 |
| C  | 5.327162000000  | 11.713065000000  | 2.773698000000  | C  | 5.327375000000  | 11.717045000000  | 2.775612000000  |
| C  | 3.879501000000  | 12.298919000000  | 1.249503000000  | C  | 3.875581000000  | 12.288505000000  | 1.256688000000  |
| C  | 3.879501000000  | 12.298919000000  | -1.249503000000 | C  | 3.875581000000  | 12.288505000000  | -1.256688000000 |
| C  | 5.327162000000  | 11.713065000000  | -2.773698000000 | C  | 5.327375000000  | 11.717045000000  | -2.775612000000 |
| C  | 4.200160000000  | 12.273847000000  | 3.468383000000  | C  | 4.208823000000  | 12.287625000000  | 3.471314000000  |
| C  | 3.292978000000  | 12.622406000000  | 2.524200000000  | C  | 3.296059000000  | 12.628457000000  | 2.527624000000  |
| C  | 3.260508000000  | 12.510256000000  | 0.000000000000  | C  | 3.250743000000  | 12.489117000000  | 0.000000000000  |
| C  | 3.292978000000  | 12.622406000000  | -2.524200000000 | C  | 3.296059000000  | 12.628457000000  | -2.527624000000 |
| C  | 4.200160000000  | 12.273847000000  | -3.468383000000 | C  | 4.208823000000  | 12.287625000000  | -3.471314000000 |
| H  | 4.115016000000  | 12.370088000000  | 4.541820000000  | H  | 4.131571000000  | 12.400143000000  | 4.543620000000  |
| H  | 2.317907000000  | 13.064152000000  | 2.663641000000  | H  | 2.325728000000  | 13.079443000000  | 2.669901000000  |
| C  | 1.886475000000  | 12.869892000000  | 0.000000000000  | C  | 1.887143000000  | 12.831251000000  | 0.000000000000  |
| H  | 2.317907000000  | 13.064152000000  | -2.663641000000 | H  | 2.325728000000  | 13.079443000000  | -2.669901000000 |
| H  | 4.115016000000  | 12.370088000000  | -4.541820000000 | H  | 4.131571000000  | 12.400143000000  | -4.543620000000 |
| C  | 0.683406000000  | 13.021394000000  | 0.000000000000  | C  | 0.677339000000  | 12.972181000000  | 0.000000000000  |
| C  | -0.683406000000 | 13.021394000000  | 0.000000000000  | C  | -0.677339000000 | 12.972181000000  | 0.000000000000  |
| C  | -1.886475000000 | 12.869892000000  | 0.000000000000  | C  | -1.887143000000 | 12.831251000000  | 0.000000000000  |
| C  | -3.260508000000 | 12.510256000000  | 0.000000000000  | C  | -3.250743000000 | 12.489117000000  | 0.000000000000  |
| C  | -3.879501000000 | 12.298919000000  | 1.249503000000  | C  | -3.875581000000 | 12.288505000000  | 1.256688000000  |
| C  | -3.879501000000 | 12.298919000000  | -1.249503000000 | C  | -3.875581000000 | 12.288505000000  | -1.256688000000 |
| C  | -3.292978000000 | 12.622406000000  | 2.524200000000  | C  | -3.296059000000 | 12.628457000000  | 2.527624000000  |
| N  | -5.105785000000 | 11.760344000000  | 1.433563000000  | N  | -5.097720000000 | 11.748876000000  | 1.435092000000  |
| N  | -5.105785000000 | 11.760344000000  | -1.433563000000 | N  | -5.097720000000 | 11.748876000000  | -1.435092000000 |
| C  | -3.292978000000 | 12.622406000000  | -2.524200000000 | C  | -3.296059000000 | 12.628457000000  | -2.527624000000 |
| C  | -4.200160000000 | 12.273847000000  | 3.468383000000  | C  | -4.208823000000 | 12.287625000000  | 3.471314000000  |
| H  | -2.317907000000 | 13.064152000000  | 2.663641000000  | H  | -2.325728000000 | 13.079443000000  | 2.669901000000  |
| C  | -5.327162000000 | 11.713065000000  | 2.773698000000  | C  | -5.327375000000 | 11.717045000000  | 2.775612000000  |
| Zn | -6.375493000000 | 11.040966000000  | 0.000000000000  | Zn | -6.371162000000 | 11.032894000000  | 0.000000000000  |
| C  | -5.327162000000 | 11.713065000000  | -2.773698000000 | C  | -5.327375000000 | 11.717045000000  | -2.775612000000 |
| C  | -4.200160000000 | 12.273847000000  | -3.468383000000 | C  | -4.208823000000 | 12.287625000000  | -3.471314000000 |
| H  | -2.317907000000 | 13.064152000000  | -2.663641000000 | H  | -2.325728000000 | 13.079443000000  | -2.669901000000 |
| H  | -4.115016000000 | 12.370088000000  | 4.541820000000  | H  | -4.131571000000 | 12.400143000000  | 4.543620000000  |
| C  | -6.434913000000 | 11.143962000000  | 3.389945000000  | C  | -6.440222000000 | 11.152640000000  | 3.388352000000  |
| N  | -7.633695000000 | 10.301692000000  | 1.433566000000  | N  | -7.628359000000 | 10.288842000000  | 1.435108000000  |
| N  | -7.633695000000 | 10.301692000000  | -1.433566000000 | N  | -7.628359000000 | 10.288842000000  | -1.435108000000 |

|                          |                  |                  |                 |                          |                  |                  |                 |
|--------------------------|------------------|------------------|-----------------|--------------------------|------------------|------------------|-----------------|
| C                        | -6.434913000000  | 11.143962000000  | -3.389945000000 | C                        | -6.440222000000  | 11.152640000000  | -3.388352000000 |
| H                        | -4.115016000000  | 12.370088000000  | -4.541820000000 | H                        | -4.131571000000  | 12.400143000000  | -4.543620000000 |
| C                        | -7.481973000000  | 10.469685000000  | 2.773700000000  | C                        | -7.485855000000  | 10.471741000000  | 2.775633000000  |
| C                        | -8.713657000000  | 9.509534000000   | 1.249502000000  | C                        | -8.707254000000  | 9.500942000000   | 1.256699000000  |
| C                        | -8.713657000000  | 9.509534000000   | -1.249502000000 | C                        | -8.707254000000  | 9.500942000000   | -1.256699000000 |
| C                        | -7.481973000000  | 10.469685000000  | -2.773700000000 | C                        | -7.485855000000  | 10.471741000000  | -2.775633000000 |
| C                        | -8.531473000000  | 9.774586000000   | 3.468383000000  | C                        | -8.539718000000  | 9.789020000000   | 3.471330000000  |
| C                        | -9.287235000000  | 9.163612000000   | 2.524198000000  | C                        | -9.291657000000  | 9.169438000000   | 2.527640000000  |
| C                        | -9.206385000000  | 9.079380000000   | 0.000000000000  | C                        | -9.193671000000  | 9.060402000000   | 0.000000000000  |
| C                        | -9.287235000000  | 9.163612000000   | -2.524198000000 | C                        | -9.291657000000  | 9.169438000000   | -2.527640000000 |
| C                        | -8.531473000000  | 9.774586000000   | -3.468383000000 | C                        | -8.539718000000  | 9.789020000000   | -3.471330000000 |
| H                        | -8.657401000000  | 9.749019000000   | 4.541821000000  | H                        | -8.675803000000  | 9.778474000000   | 4.543635000000  |
| H                        | -10.157638000000 | 8.540475000000   | 2.663641000000  | H                        | -10.167777000000 | 8.555154000000   | 2.669912000000  |
| C                        | -10.205187000000 | 8.069577000000   | 0.000000000000  | C                        | -10.172273000000 | 8.051040000000   | 0.000000000000  |
| H                        | -10.157638000000 | 8.540475000000   | -2.663641000000 | H                        | -10.167777000000 | 8.555154000000   | -2.669912000000 |
| H                        | -8.657401000000  | 9.749019000000   | -4.541821000000 | H                        | -8.675803000000  | 9.778474000000   | -4.543635000000 |
| C                        | -10.938082000000 | 7.103559000000   | 0.000000000000  | C                        | -10.899529000000 | 7.074011000000   | 0.000000000000  |
| H                        | -6.456196000000  | -11.180850000000 | -4.473044000000 | H                        | -6.470866000000  | -11.205779000000 | -4.470644000000 |
| H                        | 6.456196000000   | -11.180850000000 | -4.473044000000 | H                        | 6.470866000000   | -11.205779000000 | -4.470644000000 |
| H                        | 12.913097000000  | 0.000000000000   | -4.473019000000 | H                        | 12.943131000000  | 0.000000000000   | -4.470605000000 |
| H                        | 6.456196000000   | 11.180850000000  | -4.473044000000 | H                        | 6.470866000000   | 11.205779000000  | -4.470644000000 |
| H                        | -6.456196000000  | 11.180850000000  | -4.473044000000 | H                        | -6.470866000000  | 11.205779000000  | -4.470644000000 |
| H                        | -12.913097000000 | 0.000000000000   | -4.473019000000 | H                        | -12.943131000000 | 0.000000000000   | -4.470605000000 |
| H                        | 6.456196000000   | 11.180850000000  | 4.473044000000  | H                        | 6.470866000000   | 11.205779000000  | 4.470644000000  |
| H                        | 12.913097000000  | 0.000000000000   | 4.473019000000  | H                        | 12.943131000000  | 0.000000000000   | 4.470605000000  |
| H                        | 6.456196000000   | -11.180850000000 | 4.473044000000  | H                        | 6.470866000000   | -11.205779000000 | 4.470644000000  |
| H                        | -6.456196000000  | -11.180850000000 | 4.473044000000  | H                        | -6.470866000000  | -11.205779000000 | 4.470644000000  |
| H                        | -12.913097000000 | 0.000000000000   | 4.473019000000  | H                        | -12.943131000000 | 0.000000000000   | 4.470605000000  |
| H                        | -6.456196000000  | 11.180850000000  | 4.473044000000  | H                        | -6.470866000000  | 11.205779000000  | 4.470644000000  |
| <b>c-P6<sup>4+</sup></b> |                  |                  |                 | <b>c-P6<sup>6+</sup></b> |                  |                  |                 |
| C                        | -13.165591000000 | 2.786868000000   | 1.271611000000  | C                        | 10.837819000000  | -6.649518000000  | 1.256402000000  |
| C                        | -13.217885000000 | 3.462359000000   | 2.530813000000  | C                        | 10.602696000000  | -7.274376000000  | 2.522283000000  |
| C                        | -13.419432000000 | 2.499277000000   | 3.472234000000  | C                        | 11.155455000000  | -6.460187000000  | 3.464436000000  |
| C                        | -13.458800000000 | 1.251407000000   | 2.776680000000  | C                        | 11.691813000000  | -5.339217000000  | 2.761773000000  |
| N                        | -13.317448000000 | 1.465507000000   | 1.436485000000  | N                        | 11.501217000000  | -5.478589000000  | 1.434850000000  |
| H                        | -13.134654000000 | 4.528596000000   | 2.677471000000  | H                        | 10.104988000000  | -8.220155000000  | 2.674094000000  |
| H                        | -13.524462000000 | 2.626647000000   | 4.540543000000  | H                        | 11.190121000000  | -6.609402000000  | 4.534363000000  |
| C                        | -13.550250000000 | 0.000572000000   | 3.379549000000  | C                        | 12.285481000000  | -4.213945000000  | 3.380175000000  |
| C                        | -13.458850000000 | -1.250242000000  | 2.776655000000  | C                        | 12.694812000000  | -3.046597000000  | 2.787737000000  |
| C                        | -13.419537000000 | -2.498136000000  | 3.472176000000  | C                        | 13.179308000000  | -1.882191000000  | 3.479578000000  |
| N                        | -13.317495000000 | -1.464320000000  | 1.436449000000  | N                        | 12.635572000000  | -2.777093000000  | 1.435446000000  |
| C                        | -13.218023000000 | -3.461201000000  | 2.530733000000  | C                        | 13.369411000000  | -0.921548000000  | 2.542445000000  |
| H                        | -13.524579000000 | -2.625530000000  | 4.540481000000  | H                        | 13.346168000000  | -1.812924000000  | 4.545625000000  |
| C                        | -13.165693000000 | -2.785676000000  | 1.271547000000  | C                        | 13.026603000000  | -1.519887000000  | 1.280585000000  |
| H                        | -13.134838000000 | -4.527445000000  | 2.677363000000  | H                        | 13.730889000000  | 0.085561000000   | 2.685827000000  |
| C                        | -12.969961000000 | -3.426537000000  | 0.000158000000  | C                        | 13.082798000000  | -0.840984000000  | -0.001138000000 |
| C                        | -13.165641000000 | -2.785643000000  | -1.271224000000 | C                        | 13.026454000000  | -1.520061000000  | -1.282765000000 |
| C                        | -13.217921000000 | -3.461138000000  | -2.530428000000 | C                        | 13.369128000000  | -0.921892000000  | -2.544744000000 |
| N                        | -13.317435000000 | -1.464284000000  | -1.436099000000 | N                        | 12.635402000000  | -2.777285000000  | -1.437411000000 |
| C                        | -13.419396000000 | -2.498050000000  | -3.471855000000 | C                        | 13.178921000000  | -1.882661000000  | -3.481725000000 |
| H                        | -13.134732000000 | -4.527379000000  | -2.677081000000 | H                        | 13.730592000000  | 0.085196000000   | -2.688301000000 |
| C                        | -13.458736000000 | -1.250173000000  | -2.776306000000 | C                        | 12.694496000000  | -3.046973000000  | -2.789673000000 |
| H                        | -13.524395000000 | -2.625417000000  | -4.540168000000 | H                        | 13.345666000000  | -1.813539000000  | -4.547799000000 |
| C                        | -13.550111000000 | 0.000657000000   | -3.379172000000 | C                        | 12.285102000000  | -4.214401000000  | -3.381906000000 |
| C                        | -13.458686000000 | 1.251476000000   | -2.776268000000 | C                        | 11.691499000000  | -5.339589000000  | -2.763283000000 |
| C                        | -13.419291000000 | 2.499364000000   | -3.471788000000 | C                        | 11.155052000000  | -6.460648000000  | -3.465737000000 |
| N                        | -13.317388000000 | 1.465543000000   | -1.436061000000 | N                        | 11.501060000000  | -5.478785000000  | -1.436321000000 |
| C                        | -13.217783000000 | 3.462423000000   | -2.530335000000 | C                        | 10.602399000000  | -7.274709000000  | -2.523412000000 |
| H                        | -13.524277000000 | 2.626762000000   | -4.540098000000 | H                        | 11.189594000000  | -6.610004000000  | -4.535649000000 |
| C                        | -13.165538000000 | 2.786899000000   | -1.271148000000 | C                        | 10.837674000000  | -6.649688000000  | -1.257639000000 |
| H                        | -13.134548000000 | 4.528663000000   | -2.676962000000 | H                        | 10.104667000000  | -8.220504000000  | -2.675041000000 |
| C                        | -12.969849000000 | 3.427751000000   | 0.000243000000  | C                        | 10.458925000000  | -7.175317000000  | -0.000562000000 |
| Zn                       | -13.329759000000 | 0.000616000000   | 0.000193000000  | Zn                       | 12.082351000000  | -4.148021000000  | -0.000855000000 |
| C                        | -12.509345000000 | 4.723327000000   | 0.000269000000  | C                        | 9.585255000000   | -8.292837000000  | -0.000433000000 |
| C                        | -11.925962000000 | 5.809518000000   | 0.000274000000  | C                        | 8.733407000000   | -9.156284000000  | -0.000295000000 |
| C                        | -12.509461000000 | -4.722100000000  | 0.000150000000  | C                        | 13.117002000000  | 0.512707000000   | -0.001234000000 |
| C                        | -11.926091000000 | -5.808308000000  | 0.000134000000  | C                        | 13.001225000000  | 1.755488000000   | -0.001301000000 |
| C                        | -6.547599000000  | -10.754634000000 | -3.388384000000 | C                        | 9.943482000000   | 8.354302000000   | -3.382564000000 |
| C                        | -5.385394000000  | -11.247132000000 | -2.768267000000 | C                        | 8.984547000000   | 9.190359000000   | -2.764047000000 |
| C                        | -7.622945000000  | -10.143855000000 | -2.786635000000 | C                        | 10.745739000000  | 7.412636000000   | -2.790211000000 |
| C                        | -4.242920000000  | -11.750298000000 | -3.467698000000 | C                        | 8.080441000000   | 10.042991000000  | -3.466615000000 |
| N                        | -5.159305000000  | -11.257454000000 | -1.436625000000 | N                        | 8.756735000000   | 9.251789000000   | -1.437101000000 |
| C                        | -8.732836000000  | -9.544832000000  | -3.480491000000 | C                        | 11.616979000000  | 6.500822000000   | -3.482135000000 |
| N                        | -7.773801000000  | -9.946537000000  | -1.435865000000 | N                        | 10.787667000000  | 7.139893000000   | -1.437921000000 |

|    |                  |                  |                 |    |                  |                 |                 |
|----|------------------|------------------|-----------------|----|------------------|-----------------|-----------------|
| C  | -3.307691000000  | -12.036699000000 | -2.523255000000 | C  | 7.271707000000   | 10.603544000000 | -2.524370000000 |
| H  | -4.162803000000  | -11.863508000000 | -4.539566000000 | H  | 8.058913000000   | 10.194656000000 | -4.536543000000 |
| C  | -3.901284000000  | -11.729510000000 | -1.254928000000 | C  | 7.716215000000   | 10.105291000000 | -1.258534000000 |
| Zn | -6.470203000000  | -10.623484000000 | -0.000101000000 | Zn | 9.778130000000   | 8.219709000000  | -0.001497000000 |
| C  | -9.516212000000  | -8.967660000000  | -2.539773000000 | C  | 12.140340000000  | 5.673076000000  | -2.545051000000 |
| H  | -8.881329000000  | -9.562240000000  | -4.551150000000 | H  | 11.797495000000  | 6.496295000000  | -4.548197000000 |
| C  | -8.894413000000  | -9.241996000000  | -1.268372000000 | C  | 11.605179000000  | 6.107825000000  | -1.283141000000 |
| H  | -2.315112000000  | -12.434796000000 | -2.669681000000 | H  | 6.466801000000   | 11.306653000000 | -2.676094000000 |
| C  | -3.275418000000  | -11.898493000000 | -0.000170000000 | C  | 7.173568000000   | 10.459412000000 | -0.001512000000 |
| N  | -7.773803000000  | -9.946696000000  | 1.435737000000  | N  | 10.787789000000  | 7.140049000000  | 1.434950000000  |
| N  | -5.159307000000  | -11.257614000000 | 1.436355000000  | N  | 8.756851000000   | 9.251941000000  | 1.434075000000  |
| H  | -10.437493000000 | -8.423546000000  | -2.682238000000 | H  | 12.840209000000  | 4.863695000000  | -2.688505000000 |
| C  | -9.405735000000  | -8.815020000000  | -0.000030000000 | C  | 11.902198000000  | 5.494700000000  | -0.001444000000 |
| C  | -3.901286000000  | -11.729649000000 | 1.254606000000  | C  | 7.716326000000   | 10.105431000000 | 1.255506000000  |
| C  | -1.889752000000  | -12.199056000000 | -0.000186000000 | C  | 5.956124000000   | 11.187410000000 | -0.001500000000 |
| C  | -8.894415000000  | -9.242137000000  | 1.268320000000  | C  | 11.605283000000  | 6.107956000000  | 1.280213000000  |
| C  | -7.622948000000  | -10.144164000000 | 2.786485000000  | C  | 10.745972000000  | 7.412931000000  | 2.787212000000  |
| C  | -5.385398000000  | -11.247439000000 | 2.767997000000  | C  | 8.984786000000   | 9.190661000000  | 2.761011000000  |
| C  | -10.403869000000 | -7.863596000000  | 0.000490000000  | C  | 12.421595000000  | 4.244149000000  | -0.001406000000 |
| C  | -3.307694000000  | -12.036981000000 | 2.522900000000  | C  | 7.271938000000   | 10.603836000000 | 2.521324000000  |
| C  | -0.682600000000  | -12.315001000000 | -0.000184000000 | C  | 4.850501000000   | 11.686185000000 | -0.001462000000 |
| C  | -9.516215000000  | -8.967941000000  | 2.539751000000  | C  | 12.140539000000  | 5.673334000000  | 2.542125000000  |
| C  | -8.732840000000  | -9.545218000000  | 3.480406000000  | C  | 11.617256000000  | 6.501183000000  | 3.479162000000  |
| C  | -6.547603000000  | -10.755010000000 | 3.388167000000  | C  | 9.943767000000   | 8.354667000000  | 3.379532000000  |
| C  | -4.242925000000  | -11.750685000000 | 3.467373000000  | C  | 8.080753000000   | 10.043383000000 | 3.463561000000  |
| C  | -11.200628000000 | -6.923152000000  | 0.000092000000  | C  | 12.761253000000  | 3.043090000000  | -0.001363000000 |
| H  | -2.315116000000  | -12.435094000000 | 2.669282000000  | H  | 6.467053000000   | 11.306970000000 | 2.673040000000  |
| H  | -10.437496000000 | -8.423844000000  | 2.682276000000  | H  | 12.840412000000  | 4.863963000000  | 2.685610000000  |
| H  | -8.881335000000  | -9.562745000000  | 4.551063000000  | H  | 11.797856000000  | 6.496765000000  | 4.545211000000  |
| H  | -4.162809000000  | -11.864014000000 | 4.539229000000  | H  | 8.059322000000   | 10.195172000000 | 4.533474000000  |
| C  | 11.200085000000  | -6.924099000000  | 0.000238000000  | C  | -8.020316000000  | 10.379792000000 | -0.000264000000 |
| C  | 11.925718000000  | -5.809349000000  | 0.000222000000  | C  | -9.015695000000  | 9.528488000000  | -0.000027000000 |
| C  | 10.403190000000  | -7.864415000000  | 0.000241000000  | C  | -7.001743000000  | 11.101187000000 | -0.000468000000 |
| C  | 12.509164000000  | -4.723192000000  | 0.000206000000  | C  | -9.886314000000  | 8.634101000000  | 0.000196000000  |
| C  | 9.404917000000   | -8.815717000000  | 0.000176000000  | C  | -5.812264000000  | 11.748327000000 | -0.000575000000 |
| C  | 12.969729000000  | -3.427637000000  | 0.000210000000  | C  | -10.709952000000 | 7.559265000000  | 0.000386000000  |
| C  | 8.893569000000   | -9.242627000000  | -1.268192000000 | C  | -5.196244000000  | 12.039123000000 | -1.282309000000 |
| C  | 8.893523000000   | -9.242754000000  | 1.268484000000  | C  | -5.196006000000  | 12.039114000000 | 1.281043000000  |
| C  | 13.165537000000  | -2.786799000000  | -1.271170000000 | C  | -11.092849000000 | 6.995495000000  | -1.281194000000 |
| C  | 13.165397000000  | -2.786755000000  | 1.271589000000  | C  | -11.092526000000 | 6.995700000000  | 1.282150000000  |
| C  | 9.515404000000   | -8.968337000000  | -2.539587000000 | C  | -5.885847000000  | 12.036759000000 | -2.544161000000 |
| N  | 7.772891000000   | -9.947069000000  | -1.435710000000 | N  | -3.911992000000  | 12.329232000000 | -1.437184000000 |
| C  | 9.515312000000   | -8.968591000000  | 2.539929000000  | C  | -5.885365000000  | 12.036728000000 | 2.543024000000  |
| N  | 7.772839000000   | -9.947212000000  | 1.435890000000  | N  | -3.911725000000  | 12.329239000000 | 1.435678000000  |
| N  | 13.317456000000  | -1.465449000000  | -1.436078000000 | N  | -11.578269000000 | 5.771600000000  | -1.435790000000 |
| C  | 13.217849000000  | -3.462330000000  | -2.530350000000 | C  | -10.984053000000 | 7.676225000000  | -2.543175000000 |
| N  | 13.317298000000  | -1.465400000000  | 1.436468000000  | N  | -11.577919000000 | 5.771830000000  | 1.437049000000  |
| C  | 13.217569000000  | -3.462243000000  | 2.530799000000  | C  | -10.983399000000 | 7.676623000000  | 2.543995000000  |
| C  | 8.731985000000   | -9.545427000000  | -3.480319000000 | C  | -4.958908000000  | 12.352568000000 | -3.481304000000 |
| H  | 10.436735000000  | -8.424304000000  | -2.682038000000 | H  | -6.938745000000  | 11.846126000000 | -2.687534000000 |
| C  | 7.622034000000   | -10.144359000000 | -2.786478000000 | C  | -3.708267000000  | 12.515338000000 | -2.789477000000 |
| Zn | 6.469212000000   | -10.623892000000 | 0.000032000000  | Zn | -2.448163000000  | 12.535919000000 | -0.000882000000 |
| C  | 8.731858000000   | -9.545774000000  | 3.480574000000  | C  | -4.958249000000  | 12.352541000000 | 3.479994000000  |
| H  | 10.436637000000  | -8.424572000000  | 2.682468000000  | H  | -6.938234000000  | 11.846083000000 | 2.686597000000  |
| C  | 7.621932000000   | -10.144636000000 | 2.786633000000  | C  | -3.707746000000  | 12.515333000000 | 2.787931000000  |
| C  | 13.458860000000  | -1.251395000000  | -2.776275000000 | C  | -11.793910000000 | 5.598902000000  | -2.788004000000 |
| Zn | 13.329782000000  | -0.000518000000  | 0.000171000000  | Zn | -12.008643000000 | 4.357590000000  | 0.000807000000  |
| C  | 13.419462000000  | -2.499284000000  | -3.471793000000 | C  | -11.439715000000 | 6.809185000000  | -3.480088000000 |
| H  | 13.134581000000  | -4.528568000000  | -2.676979000000 | H  | -10.632806000000 | 8.686916000000  | -2.686778000000 |
| C  | 13.458554000000  | -1.251299000000  | 2.776674000000  | C  | -11.793215000000 | 5.599347000000  | 2.789353000000  |
| C  | 13.419078000000  | -2.499164000000  | 3.472231000000  | C  | -11.438831000000 | 6.809731000000  | 3.481160000000  |
| H  | 13.134285000000  | -4.528475000000  | 2.677455000000  | H  | -10.632103000000 | 8.687332000000  | 2.687353000000  |
| H  | 8.880486000000   | -9.562837000000  | -4.550976000000 | H  | -5.102351000000  | 12.462445000000 | -4.547345000000 |
| C  | 6.546642000000   | -10.755043000000 | -3.388250000000 | C  | -2.492707000000  | 12.744771000000 | -3.381932000000 |
| N  | 5.158281000000   | -11.257753000000 | -1.436513000000 | N  | -1.005350000000  | 12.698296000000 | -1.436609000000 |
| N  | 5.158228000000   | -11.257896000000 | 1.436466000000  | N  | -1.005080000000  | 12.698291000000 | 1.434562000000  |
| H  | 8.880320000000   | -9.563292000000  | 4.551235000000  | H  | -5.101491000000  | 12.462404000000 | 4.546065000000  |
| C  | 6.546518000000   | -10.755381000000 | 3.388305000000  | C  | -2.492072000000  | 12.744770000000 | 3.380161000000  |
| C  | 13.550380000000  | -0.000582000000  | -3.379179000000 | C  | -12.208720000000 | 4.433364000000  | -3.380193000000 |
| N  | 13.317623000000  | 1.464377000000   | -1.436129000000 | N  | -12.392396000000 | 2.957001000000  | -1.434611000000 |
| N  | 13.317465000000  | 1.464427000000   | 1.436418000000  | N  | -12.392040000000 | 2.957226000000  | 1.436534000000  |
| H  | 13.524521000000  | -2.626690000000  | -4.540095000000 | H  | -11.526287000000 | 6.967743000000  | -4.546137000000 |
| C  | 13.550009000000  | -0.000464000000  | 3.379544000000  | C  | -12.207886000000 | 4.433903000000  | 3.381833000000  |
| H  | 13.524018000000  | -2.626533000000  | 4.540549000000  | H  | -11.525127000000 | 6.968456000000  | 4.547206000000  |

|    |                 |                  |                 |    |                  |                  |                 |
|----|-----------------|------------------|-----------------|----|------------------|------------------|-----------------|
| C  | 5.384394000000  | -11.247445000000 | -2.768153000000 | C  | -1.221365000000  | 12.793567000000  | -2.763530000000 |
| C  | 3.900222000000  | -11.729710000000 | -1.254836000000 | C  | 0.340410000000   | 12.709448000000  | -1.258166000000 |
| C  | 5.384292000000  | -11.247721000000 | 2.768115000000  | C  | -1.220850000000  | 12.793578000000  | 2.761527000000  |
| C  | 3.900176000000  | -11.729836000000 | 1.254696000000  | C  | 0.340641000000   | 12.709459000000  | 1.255872000000  |
| C  | 13.459013000000 | 1.250254000000   | -2.776325000000 | C  | -12.453405000000 | 3.184956000000   | -2.761556000000 |
| C  | 13.165864000000 | 2.785743000000   | -1.271272000000 | C  | -12.611496000000 | 1.629188000000   | -1.255924000000 |
| C  | 13.165725000000 | 2.785788000000   | 1.271499000000  | C  | -12.611197000000 | 1.629392000000   | 1.258114000000  |
| C  | 13.458709000000 | 1.250351000000   | 2.776637000000  | C  | -12.452734000000 | 3.185400000000   | 2.763460000000  |
| C  | 4.241887000000  | -11.750521000000 | -3.467602000000 | C  | 0.017580000000   | 12.889736000000  | -3.466207000000 |
| C  | 3.306623000000  | -12.036852000000 | -2.523176000000 | C  | 0.999084000000   | 12.818330000000  | -2.524057000000 |
| C  | 3.274323000000  | -11.898647000000 | -0.000090000000 | C  | 0.985221000000   | 12.644303000000  | -0.001209000000 |
| C  | 4.241759000000  | -11.750867000000 | 3.467472000000  | C  | 0.018226000000   | 12.889771000000  | 3.463968000000  |
| C  | 3.306531000000  | -12.037104000000 | 2.522984000000  | C  | 0.999555000000   | 12.818368000000  | 2.521633000000  |
| C  | 13.419775000000 | 2.498130000000   | -3.471883000000 | C  | -12.740194000000 | 1.975685000000   | -3.463984000000 |
| C  | 13.218273000000 | 3.461231000000   | -2.530475000000 | C  | -12.821218000000 | 0.995083000000   | -2.521670000000 |
| C  | 12.970108000000 | 3.426649000000   | 0.000091000000  | C  | -12.646671000000 | 0.982267000000   | 0.001148000000  |
| C  | 13.217998000000 | 3.461319000000   | 2.530683000000  | C  | -12.820630000000 | 0.995493000000   | 2.524010000000  |
| C  | 13.419396000000 | 2.498250000000   | 3.472147000000  | C  | -12.739374000000 | 1.976247000000   | 3.466149000000  |
| H  | 4.161778000000  | -11.863722000000 | -4.539472000000 | H  | 0.129451000000   | 12.994341000000  | -4.536140000000 |
| H  | 2.314016000000  | -12.434871000000 | -2.669617000000 | H  | 2.066998000000   | 12.860364000000  | -2.675881000000 |
| C  | 1.888632000000  | -12.199107000000 | -0.000130000000 | C  | 2.389864000000   | 12.446504000000  | -0.001331000000 |
| H  | 4.161611000000  | -11.864174000000 | 4.539328000000  | H  | 0.130299000000   | 12.994388000000  | 4.533878000000  |
| H  | 2.313918000000  | -12.435137000000 | 2.669349000000  | H  | 2.067497000000   | 12.860417000000  | 2.673255000000  |
| H  | 13.524859000000 | 2.625488000000   | -4.540188000000 | H  | -12.861091000000 | 1.881182000000   | -4.533874000000 |
| H  | 13.135140000000 | 4.527474000000   | -2.677138000000 | H  | -13.027947000000 | -0.053503000000  | -2.673289000000 |
| C  | 12.509661000000 | 4.722231000000   | 0.000043000000  | C  | -12.668531000000 | -0.436064000000  | 0.001264000000  |
| H  | 13.134850000000 | 4.527567000000   | 2.677301000000  | H  | -13.027338000000 | -0.053065000000  | 2.675847000000  |
| H  | 13.524363000000 | 2.625646000000   | 4.540459000000  | H  | -12.860021000000 | 1.881917000000   | 4.536082000000  |
| C  | 0.681477000000  | -12.315015000000 | -0.000155000000 | C  | 3.563556000000   | 12.140513000000  | -0.001400000000 |
| C  | 11.926343000000 | 5.808467000000   | 0.000005000000  | C  | -12.547770100000 | -1.642954000000  | 0.001349000000  |
| C  | 11.200836000000 | 6.923281000000   | -0.000037000000 | C  | -12.297768000000 | -2.984657000000  | 0.001453000000  |
| C  | 10.404022000000 | 7.863677000000   | -0.000071000000 | C  | -11.975860000000 | -4.154082000000  | 0.001533000000  |
| C  | 9.405851000000  | 8.815061000000   | -0.000116000000 | C  | -11.444688000000 | -5.469378000000  | 0.001593000000  |
| C  | 8.894505000000  | 9.242141000000   | 1.268208000000  | C  | -11.178627000000 | -6.060164000000  | 1.258640000000  |
| C  | 8.894524000000  | 9.242037000000   | -1.268483000000 | C  | -11.178817000000 | -6.060357000000  | -1.255397000000 |
| C  | 9.516307000000  | 8.967953000000   | 2.539640000000  | C  | -11.602377000000 | -5.544092000000  | 2.524454000000  |
| N  | 7.773865000000  | 9.946654000000   | 1.435626000000  | N  | -10.495968000000 | -7.219945000000  | 1.437230000000  |
| N  | 7.773887000000  | 9.946537000000   | -1.435976000000 | N  | -10.496199000000 | -7.220180000000  | -1.433914000000 |
| C  | 9.516346000000  | 8.967745000000   | -2.539883000000 | C  | -11.602736000000 | -5.544471000000  | -2.521233000000 |
| C  | 8.732900000000  | 9.545183000000   | 3.480297000000  | C  | -11.173420000000 | -6.429668000000  | 3.466718000000  |
| H  | 10.437608000000 | 8.423890000000   | 2.682164000000  | H  | -12.172851000000 | -4.640321000000  | 2.676156000000  |
| C  | 7.622993000000  | 10.144099000000  | 2.786375000000  | C  | -10.470505000000 | -7.454528000000  | 2.764179000000  |
| Zn | 6.470250000000  | 10.623411000000  | -0.000213000000 | Zn | -9.633835000000  | -8.388384000000  | 0.001689000000  |
| C  | 7.623035000000  | 10.143869000000  | -2.786744000000 | C  | -10.470927000000 | -7.454960000000  | -2.760826000000 |
| C  | 8.732953000000  | 9.544897000000   | -3.480600000000 | C  | -11.173926000000 | -6.430196000000  | -3.463423000000 |
| H  | 10.437649000000 | 8.423671000000   | -2.682348000000 | H  | -12.173215000000 | -4.640713000000  | -2.672992000000 |
| H  | 8.881386000000  | 9.562700000000   | 4.550955000000  | H  | -11.320019000000 | -6.385001000000  | 4.536636000000  |
| C  | 6.547620000000  | 10.754896000000  | 3.388057000000  | C  | -9.792485000000  | -8.531007000000  | 3.382710000000  |
| N  | 5.159320000000  | 11.257473000000  | 1.436241000000  | N  | -8.722758000000  | -9.552442000000  | 1.438115000000  |
| N  | 5.159341000000  | 11.257353000000  | -1.436739000000 | N  | -8.722971000000  | -9.552659000000  | -1.434707000000 |
| C  | 6.547671000000  | 10.754616000000  | -3.388493000000 | C  | -9.793007000000  | -8.531544000000  | -3.379297000000 |
| H  | 8.881455000000  | 9.562325000000   | -4.551257000000 | H  | -11.320674000000 | -6.385689000000  | -4.533327000000 |
| C  | 5.385400000000  | 11.247289000000  | 2.767884000000  | C  | -8.985846000000  | -9.468948000000  | 2.790388000000  |
| C  | 3.901282000000  | 11.729463000000  | 1.254489000000  | C  | -7.829159000000  | -10.519392000000 | 1.283381000000  |
| C  | 3.901300000000  | 11.729358000000  | -1.255045000000 | C  | -7.829361000000  | -10.519592000000 | -1.279958000000 |
| C  | 5.385442000000  | 11.247060000000  | -2.768378000000 | C  | -8.986279000000  | -9.469388000000  | -2.786953000000 |
| C  | 4.242903000000  | 11.750483000000  | 3.467258000000  | C  | -8.219376000000  | -10.470406000000 | 3.482357000000  |
| C  | 3.307670000000  | 12.036759000000  | 2.522782000000  | C  | -7.482223000000  | -11.115197000000 | 2.545314000000  |
| C  | 3.275417000000  | 11.898299000000  | -0.000290000000 | C  | -7.269221000000  | -10.907516000000 | 0.001699000000  |
| C  | 3.307708000000  | 12.036549000000  | -2.523372000000 | C  | -7.482634000000  | -11.115614000000 | -2.541850000000 |
| C  | 4.242955000000  | 11.750196000000  | -3.467811000000 | C  | -8.219929000000  | -10.470972000000 | -3.478880000000 |
| H  | 4.162776000000  | 11.863796000000  | 4.539115000000  | H  | -8.242804000000  | -10.649450000000 | 4.548419000000  |
| H  | 2.315076000000  | 12.434835000000  | 2.669162000000  | H  | -6.790509000000  | -11.931550000000 | 2.688808000000  |
| C  | 1.889741000000  | 12.198819000000  | -0.000313000000 | C  | -6.113813000000  | -11.613689000000 | 0.001657000000  |
| H  | 2.315116000000  | 12.434613000000  | -2.669800000000 | H  | -6.790953000000  | -11.932000000000 | -2.685318000000 |
| H  | 4.162844000000  | 11.863420000000  | -4.539678000000 | H  | -8.243532000000  | -10.650193000000 | -4.544908000000 |
| C  | 0.682590000000  | 12.314763000000  | -0.000326000000 | C  | -4.979591000000  | -12.134692000000 | 0.001594000000  |
| C  | -0.681488000000 | 12.314819000000  | -0.000312000000 | C  | -3.744515000000  | -12.570679000000 | 0.001489000000  |
| C  | -1.888644000000 | 12.198924000000  | -0.000295000000 | C  | -2.534549000000  | -12.877085000000 | 0.001372000000  |
| C  | -3.274342000000 | 11.898495000000  | -0.000245000000 | C  | -1.191872000000  | -13.052756000000 | 0.001233000000  |
| C  | -3.900195000000 | 11.729717000000  | 1.254546000000  | C  | -0.512205000000  | -13.102225000000 | 1.282829000000  |
| C  | -3.900254000000 | 11.729574000000  | -1.254987000000 | C  | -0.512509000000  | -13.102459000000 | -1.280517000000 |
| C  | -3.306533000000 | 12.036977000000  | 2.522828000000  | C  | -1.156175000000  | -13.348105000000 | 2.544838000000  |
| N  | -5.158262000000 | 11.257822000000  | 1.436326000000  | N  | 0.790438000000   | -12.910699000000 | 1.437410000000  |

|               |                  |                  |                 |                            |                  |                  |                 |
|---------------|------------------|------------------|-----------------|----------------------------|------------------|------------------|-----------------|
| N             | -5.158330000000  | 11.257659000000  | -1.436654000000 | N                          | 0.790093000000   | -12.910953000000 | -1.435446000000 |
| C             | -3.306652000000  | 12.036688000000  | -2.523332000000 | C                          | -1.156780000000  | -13.348580000000 | -2.542328000000 |
| C             | -4.241768000000  | 11.750782000000  | 3.467323000000  | C                          | -0.177485000000  | -13.309095000000 | 3.481767000000  |
| H             | -2.313906000000  | 12.434978000000  | 2.669185000000  | H                          | -2.207099000000  | -13.549170000000 | 2.688449000000  |
| C             | -5.384321000000  | 11.247668000000  | 2.767976000000  | C                          | 1.047780000000   | -13.010891000000 | 2.789657000000  |
| Zn            | -6.469274000000  | 10.623851000000  | -0.000097000000 | Zn                         | 2.230254000000   | -12.576840000000 | 0.000784000000  |
| C             | -5.384452000000  | 11.247351000000  | -2.768292000000 | C                          | 1.047115000000   | -13.011395000000 | -2.787737000000 |
| C             | -4.241931000000  | 11.750384000000  | -3.467750000000 | C                          | -0.178316000000  | -13.309737000000 | -3.479499000000 |
| H             | -2.314032000000  | 12.434671000000  | -2.669782000000 | H                          | -2.207737000000  | -13.549677000000 | -2.685649000000 |
| H             | -4.161611000000  | 11.864098000000  | 4.539177000000  | H                          | -0.271545000000  | -13.463151000000 | 4.547841000000  |
| C             | -6.546561000000  | 10.755374000000  | 3.388175000000  | C                          | 2.264586000000   | -12.787372000000 | 3.381829000000  |
| N             | -7.772919000000  | 9.947231000000   | 1.435773000000  | N                          | 3.635091000000   | -12.208785000000 | 1.436160000000  |
| N             | -7.772986000000  | 9.947066000000   | -1.435827000000 | N                          | 3.634746000000   | -12.209048000000 | -1.435001000000 |
| C             | -6.546721000000  | 10.754985000000  | -3.388379000000 | C                          | 2.263775000000   | -12.787980000000 | -3.380239000000 |
| H             | -4.161825000000  | 11.863575000000  | -4.539622000000 | H                          | -0.272629000000  | -13.463992000000 | -4.545521000000 |
| C             | -7.622000000000  | 10.144662000000  | 2.786513000000  | C                          | 3.468134000000   | -12.375313000000 | 2.763136000000  |
| C             | -8.893630000000  | 9.242813000000   | 1.268377000000  | C                          | 4.894601000000   | -11.734758000000 | 1.257405000000  |
| C             | -8.893689000000  | 9.242668000000   | -1.268298000000 | C                          | 4.894298000000   | -11.734977000000 | -1.256633000000 |
| C             | -7.622131000000  | 10.144343000000  | -2.786597000000 | C                          | 3.467471000000   | -12.375802000000 | -2.761905000000 |
| C             | -8.731945000000  | 9.545848000000   | 3.480464000000  | C                          | 4.658803000000   | -12.019008000000 | 3.465519000000  |
| C             | -9.515423000000  | 8.968683000000   | 2.539827000000  | C                          | 5.548595000000   | -11.599133000000 | 2.523137000000  |
| C             | -9.405045000000  | 8.815785000000   | 0.000076000000  | C                          | 5.472456000000   | -11.441971000000 | 0.000288000000  |
| C             | -9.515542000000  | 8.968392000000   | -2.539688000000 | C                          | 5.547981000000   | -11.599561000000 | -2.522547000000 |
| C             | -8.732109000000  | 9.545449000000   | -3.480427000000 | C                          | 4.657965000000   | -12.019604000000 | -3.464640000000 |
| H             | -8.880403000000  | 9.563382000000   | 4.551125000000  | H                          | 4.801069000000   | -12.076246000000 | 4.535423000000  |
| H             | -10.436767000000 | 8.424700000000   | 2.682375000000  | H                          | 6.560080000000   | -11.253910000000 | 2.674710000000  |
| C             | -10.403354000000 | 7.864522000000   | 0.000154000000  | C                          | 6.711709000000   | -10.751755000000 | 0.000078000000  |
| H             | -10.436893000000 | 8.424393000000   | -2.682130000000 | H                          | 6.559427000000   | -11.254353000000 | -2.674425000000 |
| H             | -8.880616000000  | 9.562859000000   | -4.551084000000 | H                          | 4.799971000000   | -12.077024000000 | -4.534569000000 |
| C             | -11.200294000000 | 6.924244000000   | 0.000216000000  | C                          | 7.696475000000   | -10.043646000000 | -0.000103000000 |
| H             | -6.576325000000  | -10.826715000000 | -4.469738000000 | H                          | 10.020772000000  | 8.442813000000   | -4.460803000000 |
| H             | 6.575377000000   | -10.827116000000 | -4.469605000000 | H                          | -2.497402000000  | 12.862252000000  | -4.460164000000 |
| H             | 13.661637000000  | -0.000609000000  | -4.458176000000 | H                          | -12.324276000000 | 4.456015000000   | -4.458411000000 |
| H             | 6.576404000000   | 10.826715000000  | -4.469846000000 | H                          | -9.892599000000  | -8.594421000000  | -4.457508000000 |
| H             | -6.575461000000  | 10.827055000000  | -4.469734000000 | H                          | 2.301664000000   | -12.899388000000 | -4.458462000000 |
| H             | -13.661288000000 | 0.000675000000   | -4.458178000000 | H                          | 12.389065000000  | -4.269242000000  | -4.460146000000 |
| H             | 6.576337000000   | 10.827084000000  | 4.469405000000  | H                          | -9.891905000000  | -8.593715000000  | 4.460947000000  |
| H             | 13.661147000000  | -0.000455000000  | 4.458554000000  | H                          | -12.323171000000 | 4.456730000000   | 4.460076000000  |
| H             | 6.575214000000   | -10.827562000000 | 4.469653000000  | H                          | -2.496570000000  | 12.862246000000  | 4.458395000000  |
| H             | -6.576331000000  | -10.827212000000 | 4.469513000000  | H                          | 10.021151000000  | 8.443292000000   | 4.457756000000  |
| H             | -13.661471000000 | 0.000563000000   | 4.458551000000  | H                          | 12.389561000000  | -4.268637000000  | 4.458412000000  |
| H             | -6.575250000000  | 10.827568000000  | 4.469522000000  | H                          | 2.302730000000   | -12.898586000000 | 4.460063000000  |
| <b>c-Iso6</b> |                  |                  |                 | <b>c-Iso6<sup>2+</sup></b> |                  |                  |                 |
| C             | -12.748002000000 | 2.861773000000   | 1.255885000000  | C                          | -12.745891000000 | 2.853899000000   | 1.256923000000  |
| C             | -12.767369000000 | 3.480700000000   | 2.521566000000  | C                          | -12.795519000000 | 3.475913000000   | 2.516573000000  |
| C             | -12.975255000000 | 2.476733000000   | 3.435255000000  | C                          | -13.027865000000 | 2.475923000000   | 3.429277000000  |
| C             | -13.058430000000 | 1.270835000000   | 2.729649000000  | C                          | -13.090809000000 | 2.269162000000   | 2.721874000000  |
| O             | -12.927014000000 | 1.549142000000   | 1.396406000000  | O                          | -12.927264000000 | 1.540820000000   | 1.395532000000  |
| H             | -12.649442000000 | 4.538021000000   | 2.693929000000  | H                          | -12.687088000000 | 4.534356000000   | 2.689819000000  |
| H             | -13.048738000000 | 2.567532000000   | 4.509950000000  | H                          | -13.133151000000 | 2.570514000000   | 4.500790000000  |
| C             | -13.132372000000 | 0.000000000000   | 3.259525000000  | C                          | -13.183252000000 | 0.000000000000   | 3.254589000000  |
| C             | -13.058430000000 | -1.270835000000  | 2.729649000000  | C                          | -13.090809000000 | -1.269162000000  | 2.721874000000  |
| C             | -12.975255000000 | -2.476733000000  | 3.435255000000  | C                          | -13.027865000000 | -2.475923000000  | 3.429277000000  |
| O             | -12.927014000000 | -1.549142000000  | 1.396406000000  | O                          | -12.927264000000 | -1.540820000000  | 1.395532000000  |
| C             | -12.767369000000 | -3.480700000000  | 2.521566000000  | C                          | -12.795519000000 | -3.475913000000  | 2.516573000000  |
| H             | -13.048738000000 | -2.567532000000  | 4.509950000000  | H                          | -13.133151000000 | -2.570514000000  | 4.500790000000  |
| C             | -12.748002000000 | -2.861773000000  | 1.255885000000  | C                          | -12.745891000000 | -2.853899000000  | 1.256923000000  |
| H             | -12.649442000000 | -4.538021000000  | 2.693929000000  | H                          | -12.687088000000 | -4.534356000000  | 2.689819000000  |
| C             | -12.578022000000 | -3.480734000000  | 0.000000000000  | C                          | -12.552600000000 | -3.470651000000  | 0.000000000000  |
| C             | -12.748002000000 | -2.861773000000  | -1.255885000000 | C                          | -12.745891000000 | -2.853899000000  | -1.256923000000 |
| C             | -12.767369000000 | -3.480700000000  | -2.521566000000 | C                          | -12.795519000000 | -3.475913000000  | -2.516573000000 |
| O             | -12.927014000000 | -1.549142000000  | -1.396406000000 | O                          | -12.927264000000 | -1.540820000000  | -1.395532000000 |
| C             | -12.975255000000 | -2.476733000000  | -3.435255000000 | C                          | -13.027865000000 | -2.475923000000  | -3.429277000000 |
| H             | -12.649442000000 | -4.538021000000  | -2.693929000000 | H                          | -12.687088000000 | -4.534356000000  | -2.689819000000 |
| C             | -13.058430000000 | -1.270835000000  | -2.729649000000 | C                          | -13.090809000000 | -1.269162000000  | -2.721874000000 |
| H             | -13.048738000000 | -2.567532000000  | -4.509950000000 | H                          | -13.133151000000 | -2.570514000000  | -4.500790000000 |
| C             | -13.132372000000 | 0.000000000000   | -3.259525000000 | C                          | -13.183252000000 | 0.000000000000   | -3.254589000000 |
| C             | -13.058430000000 | 1.270835000000   | -2.729649000000 | C                          | -13.090809000000 | 1.269162000000   | -2.721874000000 |
| C             | -12.975255000000 | 2.476733000000   | -3.435255000000 | C                          | -13.027865000000 | 2.475923000000   | -3.429277000000 |
| O             | -12.927014000000 | 1.549142000000   | -1.396406000000 | O                          | -12.927264000000 | 1.540820000000   | -1.395532000000 |
| C             | -12.767369000000 | 3.480700000000   | -2.521566000000 | C                          | -12.795519000000 | 3.475913000000   | -2.516573000000 |
| H             | -13.048738000000 | 2.567532000000   | -4.509950000000 | H                          | -13.133151000000 | 2.570514000000   | -4.500790000000 |
| C             | -12.748002000000 | 2.861773000000   | -1.255885000000 | C                          | -12.745891000000 | 2.853899000000   | -1.256923000000 |
| H             | -12.649442000000 | 4.538021000000   | -2.693929000000 | H                          | -12.687088000000 | 4.534356000000   | -2.689819000000 |

|   |                  |                  |                 |   |                  |                  |                 |
|---|------------------|------------------|-----------------|---|------------------|------------------|-----------------|
| C | -12.578022000000 | 3.480734000000   | 0.000000000000  | C | -12.552600000000 | 3.470651000000   | 0.000000000000  |
| C | -12.158189000000 | 4.834373000000   | 0.000000000000  | C | -12.118040000000 | 4.810375000000   | 0.000000000000  |
| C | -11.680268000000 | 5.949885000000   | 0.000000000000  | C | -11.623409000000 | 5.921681000000   | 0.000000000000  |
| C | -12.158189000000 | -4.834373000000  | 0.000000000000  | C | -12.118040000000 | -4.810375000000  | 0.000000000000  |
| C | -11.680268000000 | -5.949885000000  | 0.000000000000  | C | -11.623409000000 | -5.921681000000  | 0.000000000000  |
| C | -6.563780000000  | -11.364104000000 | -3.259705000000 | C | -6.588961000000  | -11.407732000000 | -3.254786000000 |
| C | -5.426044000000  | -11.935087000000 | -2.729797000000 | C | -5.443448000000  | -11.961830000000 | -2.722051000000 |
| C | -7.627931000000  | -10.665517000000 | -2.729782000000 | C | -7.642460000000  | -10.694023000000 | -2.722038000000 |
| C | -4.339743000000  | -12.465254000000 | -3.435380000000 | C | -4.366537000000  | -12.510044000000 | -3.429428000000 |
| O | -5.119608000000  | -11.960825000000 | -1.396507000000 | O | -5.126725000000  | -11.956483000000 | -1.395625000000 |
| C | -8.631013000000  | -9.990999000000  | -3.435355000000 | C | -8.656527000000  | -10.036811000000 | -3.429406000000 |
| O | -7.803679000000  | -10.413160000000 | -1.396495000000 | O | -7.796425000000  | -10.417138000000 | -1.395634000000 |
| C | -3.366441000000  | -12.787253000000 | -2.521604000000 | C | -3.384472000000  | -12.808894000000 | -2.516631000000 |
| H | -4.297565000000  | -12.573830000000 | -4.510111000000 | H | -4.336971000000  | -12.648047000000 | -4.500955000000 |
| C | -3.893149000000  | -12.461692000000 | -1.255905000000 | C | -3.898744000000  | -12.455601000000 | -1.256934000000 |
| C | -9.397259000000  | -9.309928000000  | -2.521574000000 | C | -9.407168000000  | -9.336573000000  | -2.516605000000 |
| H | -8.746149000000  | -10.008924000000 | -4.510081000000 | H | -8.790860000000  | -10.080466000000 | -4.500956000000 |
| C | -8.851572000000  | -9.602616000000  | -1.255893000000 | C | -8.843636000000  | -9.604472000000  | -1.256943000000 |
| H | -2.391603000000  | -13.213321000000 | -2.693934000000 | H | -2.413427000000  | -13.243797000000 | -2.689837000000 |
| C | -3.272268000000  | -12.624147000000 | 0.000000000000  | C | -3.268091000000  | -12.596879000000 | 0.000000000000  |
| O | -7.803679000000  | -10.413160000000 | 1.396495000000  | O | -7.796425000000  | -10.417138000000 | 1.395634000000  |
| O | -5.119608000000  | -11.960825000000 | 1.396507000000  | O | -5.126725000000  | -11.956483000000 | 1.395625000000  |
| H | -10.254376000000 | -8.679690000000  | -2.693893000000 | H | -10.270107000000 | -8.714154000000  | -2.689812000000 |
| C | -9.303157000000  | -9.146585000000  | 0.000000000000  | C | -9.281745000000  | -9.129320000000  | 0.000000000000  |
| C | -3.893149000000  | -12.461692000000 | 1.255905000000  | C | -3.898744000000  | -12.455601000000 | 1.256934000000  |
| C | -1.890074000000  | -12.937528000000 | 0.000000000000  | C | -1.890630000000  | -12.890566000000 | 0.000000000000  |
| C | -8.851572000000  | -9.602616000000  | 1.255893000000  | C | -8.843636000000  | -9.604472000000  | 1.256943000000  |
| C | -7.627931000000  | -10.665517000000 | 2.729782000000  | C | -7.642460000000  | -10.694023000000 | 2.722038000000  |
| C | -5.426044000000  | -11.935087000000 | 2.729797000000  | C | -5.443448000000  | -11.961830000000 | 2.722051000000  |
| C | -10.266558000000 | -8.107111000000  | 0.000000000000  | C | -10.225706000000 | -8.084078000000  | 0.000000000000  |
| C | -3.366441000000  | -12.787253000000 | 2.521604000000  | C | -3.384472000000  | -12.808894000000 | 2.516631000000  |
| C | -0.685098000000  | -13.081736000000 | 0.000000000000  | C | -0.680949000000  | -13.018283000000 | 0.000000000000  |
| C | -9.397259000000  | -9.309928000000  | 2.521574000000  | C | -9.407168000000  | -9.336573000000  | 2.516605000000  |
| C | -8.631013000000  | -9.990999000000  | 3.435355000000  | C | -8.656527000000  | -10.036811000000 | 3.429406000000  |
| C | -6.563780000000  | -11.364104000000 | 3.259705000000  | C | -6.588961000000  | -11.407732000000 | 3.254786000000  |
| C | -4.339743000000  | -12.465254000000 | 3.435380000000  | C | -4.366537000000  | -12.510044000000 | 3.429428000000  |
| C | -10.994610000000 | -7.136176000000  | 0.000000000000  | C | -10.941803000000 | -7.100786000000  | 0.000000000000  |
| H | -2.391603000000  | -13.213321000000 | 2.693934000000  | H | -2.413427000000  | -13.243797000000 | 2.689837000000  |
| H | -10.254376000000 | -8.679690000000  | 2.693893000000  | H | -10.270107000000 | -8.714154000000  | 2.689812000000  |
| H | -8.746149000000  | -10.008924000000 | 4.510081000000  | H | -8.790860000000  | -10.080466000000 | 4.500956000000  |
| H | -4.297565000000  | -12.573830000000 | 4.510111000000  | H | -4.336971000000  | -12.648047000000 | 4.500955000000  |
| C | 10.994610000000  | -7.136176000000  | 0.000000000000  | C | 10.941803000000  | -7.100786000000  | 0.000000000000  |
| C | 11.680268000000  | -5.949885000000  | 0.000000000000  | C | 11.623409000000  | -5.921681000000  | 0.000000000000  |
| C | 10.266558000000  | -8.107111000000  | 0.000000000000  | C | 10.225706000000  | -8.084078000000  | 0.000000000000  |
| C | 12.158189000000  | -4.834373000000  | 0.000000000000  | C | 12.118040000000  | -4.810375000000  | 0.000000000000  |
| C | 9.303157000000   | -9.146585000000  | 0.000000000000  | C | 9.281745000000   | -9.129320000000  | 0.000000000000  |
| C | 12.578022000000  | -3.480734000000  | 0.000000000000  | C | 12.552600000000  | -3.470651000000  | 0.000000000000  |
| C | 8.851572000000   | -9.602616000000  | -1.255893000000 | C | 8.843636000000   | -9.604472000000  | -1.256943000000 |
| C | 8.851572000000   | -9.602616000000  | 1.255893000000  | C | 8.843636000000   | -9.604472000000  | 1.256943000000  |
| C | 12.748002000000  | -2.861773000000  | -1.255885000000 | C | 12.745891000000  | -2.853899000000  | -1.256923000000 |
| C | 12.748002000000  | -2.861773000000  | 1.255885000000  | C | 12.745891000000  | -2.853899000000  | 1.256923000000  |
| C | 9.397259000000   | -9.309928000000  | -2.521574000000 | C | 9.407168000000   | -9.336573000000  | -2.516605000000 |
| O | 7.803679000000   | -10.413160000000 | -1.396495000000 | O | 7.796425000000   | -10.417138000000 | -1.395634000000 |
| C | 9.397259000000   | -9.309928000000  | 2.521574000000  | C | 9.407168000000   | -9.336573000000  | 2.516605000000  |
| O | 7.803679000000   | -10.413160000000 | 1.396495000000  | O | 7.796425000000   | -10.417138000000 | 1.395634000000  |
| O | 12.927014000000  | -1.549142000000  | -1.396406000000 | O | 12.927264000000  | -1.540820000000  | -1.395532000000 |
| C | 12.767369000000  | -3.480700000000  | -2.521566000000 | C | 12.795519000000  | -3.475913000000  | -2.516573000000 |
| O | 12.927014000000  | -1.549142000000  | 1.396406000000  | O | 12.927264000000  | -1.540820000000  | 1.395532000000  |
| C | 12.767369000000  | -3.480700000000  | 2.521566000000  | C | 12.795519000000  | -3.475913000000  | 2.516573000000  |
| C | 8.631013000000   | -9.990999000000  | -3.435355000000 | C | 8.656527000000   | -10.036811000000 | -3.429406000000 |
| H | 10.254376000000  | -8.679690000000  | -2.693893000000 | H | 10.270107000000  | -8.714154000000  | -2.689812000000 |
| C | 7.627931000000   | -10.665517000000 | -2.729782000000 | C | 7.642460000000   | -10.694023000000 | -2.722038000000 |
| C | 8.631013000000   | -9.990999000000  | 3.435355000000  | C | 8.656527000000   | -10.036811000000 | 3.429406000000  |
| H | 10.254376000000  | -8.679690000000  | 2.693893000000  | H | 10.270107000000  | -8.714154000000  | 2.689812000000  |
| C | 7.627931000000   | -10.665517000000 | 2.729782000000  | C | 7.642460000000   | -10.694023000000 | 2.722038000000  |
| C | 13.058430000000  | -1.270835000000  | -2.729649000000 | C | 13.090809000000  | -1.269162000000  | -2.721874000000 |
| C | 12.975255000000  | -2.476733000000  | -3.435255000000 | C | 13.027865000000  | -2.475923000000  | -3.429277000000 |
| H | 12.649442000000  | -4.538021000000  | -2.693929000000 | H | 12.687088000000  | -4.534356000000  | -2.689819000000 |
| C | 13.058430000000  | -1.270835000000  | 2.729649000000  | C | 13.090809000000  | -1.269162000000  | 2.721874000000  |
| C | 12.975255000000  | -2.476733000000  | 3.435255000000  | C | 13.027865000000  | -2.475923000000  | 3.429277000000  |
| H | 12.649442000000  | -4.538021000000  | 2.693929000000  | H | 12.687088000000  | -4.534356000000  | 2.689819000000  |
| H | 8.746149000000   | -10.008924000000 | -4.510081000000 | H | 8.790860000000   | -10.080466000000 | -4.500956000000 |
| C | 6.563780000000   | -11.364104000000 | -3.259705000000 | C | 6.588961000000   | -11.407732000000 | -3.254786000000 |
| O | 5.119608000000   | -11.960825000000 | -1.396507000000 | O | 5.126725000000   | -11.956483000000 | -1.395625000000 |



|   |                 |                  |                 |   |                 |                  |                 |
|---|-----------------|------------------|-----------------|---|-----------------|------------------|-----------------|
| O | 5.119608000000  | -11.960825000000 | 1.396507000000  | O | 5.126725000000  | -11.956483000000 | 1.395625000000  |
| H | 8.746149000000  | -10.008924000000 | 4.510081000000  | H | 8.790860000000  | -10.080466000000 | 4.500956000000  |
| C | 6.563780000000  | -11.364104000000 | 3.259705000000  | C | 6.588961000000  | -11.407732000000 | 3.254786000000  |
| C | 13.132372000000 | 0.000000000000   | -3.259525000000 | C | 13.183252000000 | 0.000000000000   | -3.254589000000 |
| O | 12.927014000000 | 1.549142000000   | -1.396406000000 | O | 12.927264000000 | 1.540820000000   | -1.395532000000 |
| O | 12.927014000000 | 1.549142000000   | 1.396406000000  | O | 12.927264000000 | 1.540820000000   | 1.395532000000  |
| H | 13.048738000000 | -2.567532000000  | -4.509950000000 | H | 13.133151000000 | -2.570514000000  | -4.500790000000 |
| C | 13.132372000000 | 0.000000000000   | 3.259525000000  | C | 13.183252000000 | 0.000000000000   | 3.254589000000  |
| H | 13.048738000000 | -2.567532000000  | 4.509950000000  | H | 13.133151000000 | -2.570514000000  | 4.500790000000  |
| C | 5.426044000000  | -11.935087000000 | -2.729797000000 | C | 5.443448000000  | -11.961830000000 | -2.722051000000 |
| C | 3.893149000000  | -12.461692000000 | -1.255905000000 | C | 3.898744000000  | -12.455601000000 | -1.256934000000 |
| C | 5.426044000000  | -11.935087000000 | 2.729797000000  | C | 5.443448000000  | -11.961830000000 | 2.722051000000  |
| C | 3.893149000000  | -12.461692000000 | 1.255905000000  | C | 3.898744000000  | -12.455601000000 | 1.256934000000  |
| C | 13.058430000000 | 1.270835000000   | -2.729649000000 | C | 13.090809000000 | 1.269162000000   | -2.721874000000 |
| C | 12.748002000000 | 2.861773000000   | -1.255885000000 | C | 12.745891000000 | 2.853899000000   | -1.256923000000 |
| C | 12.748002000000 | 2.861773000000   | 1.255885000000  | C | 12.745891000000 | 2.853899000000   | 1.256923000000  |
| C | 13.058430000000 | 1.270835000000   | 2.729649000000  | C | 13.090809000000 | 1.269162000000   | 2.721874000000  |
| C | 4.339743000000  | -12.465254000000 | -3.435380000000 | C | 4.366537000000  | -12.510044000000 | -3.429428000000 |
| C | 3.366441000000  | -12.787253000000 | -2.521604000000 | C | 3.384472000000  | -12.808894000000 | -2.516631000000 |
| C | 3.272268000000  | -12.624147000000 | 0.000000000000  | C | 3.268091000000  | -12.596879000000 | 0.000000000000  |
| C | 4.339743000000  | -12.465254000000 | 3.435380000000  | C | 4.366537000000  | -12.510044000000 | 3.429428000000  |
| C | 3.366441000000  | -12.787253000000 | 2.521604000000  | C | 3.384472000000  | -12.808894000000 | 2.516631000000  |
| C | 12.975255000000 | 2.476733000000   | -3.435255000000 | C | 13.027865000000 | 2.475923000000   | -3.429277000000 |
| C | 12.767369000000 | 3.487000000000   | 0.000000000000  | C | 12.795519000000 | 3.475913000000   | -2.516573000000 |
| C | 12.578022000000 | 3.480734000000   | 0.000000000000  | C | 12.552600000000 | 3.470651000000   | 0.000000000000  |
| C | 12.767369000000 | 3.480700000000   | 2.521566000000  | C | 12.795519000000 | 3.475913000000   | 2.516573000000  |
| C | 12.975255000000 | 2.476733000000   | 3.435255000000  | C | 13.027865000000 | 2.475923000000   | 3.429277000000  |
| H | 4.297565000000  | -12.573830000000 | -4.510111000000 | H | 4.336971000000  | -12.648047000000 | -4.500995000000 |
| H | 2.391603000000  | -13.213321000000 | -2.693934000000 | H | 2.413427000000  | -13.243797000000 | -2.689837000000 |
| C | 1.890074000000  | -12.937528000000 | 0.000000000000  | C | 1.890630000000  | -12.890566000000 | 0.000000000000  |
| H | 4.297565000000  | -12.573830000000 | 4.510111000000  | H | 4.336971000000  | -12.648047000000 | 4.500995000000  |
| H | 2.391603000000  | -13.213321000000 | 2.693934000000  | H | 2.413427000000  | -13.243797000000 | 2.689837000000  |
| H | 13.048738000000 | 2.567532000000   | -4.509950000000 | H | 13.133151000000 | 2.570514000000   | -4.500790000000 |
| H | 12.649442000000 | 4.538021000000   | -2.693929000000 | H | 12.687088000000 | 4.534356000000   | -2.689819000000 |
| C | 12.158189000000 | 4.834373000000   | 0.000000000000  | C | 12.118040000000 | 4.810375000000   | 0.000000000000  |
| H | 12.649442000000 | 4.538021000000   | 2.693929000000  | H | 12.687088000000 | 4.534356000000   | 2.689819000000  |
| H | 13.048738000000 | 2.567532000000   | 4.509950000000  | H | 13.133151000000 | 2.570514000000   | 4.500790000000  |
| C | 0.685098000000  | -13.081736000000 | 0.000000000000  | C | 0.680949000000  | -13.018283000000 | 0.000000000000  |
| C | 11.680268000000 | 5.949885000000   | 0.000000000000  | C | 11.623409000000 | 5.921681000000   | 0.000000000000  |
| C | 10.994610000000 | 7.136176000000   | 0.000000000000  | C | 10.941803000000 | 7.100786000000   | 0.000000000000  |
| C | 10.266558000000 | 8.107111000000   | 0.000000000000  | C | 10.225706000000 | 8.084078000000   | 0.000000000000  |
| C | 9.303157000000  | 9.146585000000   | 0.000000000000  | C | 9.281745000000  | 9.129320000000   | 0.000000000000  |
| C | 8.851572000000  | 9.602616000000   | 1.255893000000  | C | 8.843636000000  | 9.604472000000   | 1.256943000000  |
| C | 8.851572000000  | 9.602616000000   | -1.255893000000 | C | 8.843636000000  | 9.604472000000   | -1.256943000000 |
| C | 9.397259000000  | 9.309928000000   | 2.521574000000  | C | 9.407168000000  | 9.336573000000   | 2.516605000000  |
| O | 7.803679000000  | 10.413160000000  | 1.396495000000  | O | 7.796425000000  | 10.417138000000  | 1.395634000000  |
| O | 7.803679000000  | 10.413160000000  | -1.396495000000 | O | 7.796425000000  | 10.417138000000  | -1.395634000000 |
| C | 9.397259000000  | 9.309928000000   | -2.521574000000 | C | 9.407168000000  | 9.336573000000   | -2.516605000000 |
| C | 8.631013000000  | 9.990999000000   | 3.435355000000  | C | 8.656527000000  | 10.036811000000  | 3.429406000000  |
| H | 10.254376000000 | 8.679690000000   | 2.693893000000  | H | 10.270107000000 | 8.714154000000   | 2.689812000000  |
| C | 7.627931000000  | 10.665517000000  | 2.729782000000  | C | 7.642460000000  | 10.694023000000  | 2.722038000000  |
| C | 7.627931000000  | 10.665517000000  | -2.729782000000 | C | 7.642460000000  | 10.694023000000  | -2.722038000000 |
| C | 8.631013000000  | 9.990999000000   | -3.435355000000 | C | 8.656527000000  | 10.036811000000  | -3.429406000000 |
| H | 10.254376000000 | 8.679690000000   | -2.693893000000 | H | 10.270107000000 | 8.714154000000   | -2.689812000000 |
| H | 8.746149000000  | 10.008924000000  | 4.510081000000  | H | 8.790860000000  | 10.080466000000  | 4.500956000000  |
| C | 6.563780000000  | 11.364104000000  | 3.259705000000  | C | 6.588961000000  | 11.407732000000  | 3.254786000000  |
| O | 5.119608000000  | 11.960825000000  | 1.396507000000  | O | 5.126725000000  | 11.956483000000  | 1.395625000000  |
| O | 5.119608000000  | 11.960825000000  | -1.396507000000 | O | 5.126725000000  | 11.956483000000  | -1.395625000000 |
| C | 6.563780000000  | 11.364104000000  | -3.259705000000 | C | 6.588961000000  | 11.407732000000  | -3.254786000000 |
| H | 8.746149000000  | 10.008924000000  | -4.510081000000 | H | 8.790860000000  | 10.080466000000  | -4.500956000000 |
| C | 5.426044000000  | 11.935087000000  | 2.729797000000  | C | 5.443448000000  | 11.961830000000  | 2.722051000000  |
| C | 3.893149000000  | 12.461692000000  | 1.255905000000  | C | 3.898744000000  | 12.455601000000  | 1.256934000000  |
| C | 3.893149000000  | 12.461692000000  | -1.255905000000 | C | 3.898744000000  | 12.455601000000  | -1.256934000000 |
| C | 5.426044000000  | 11.935087000000  | -2.729797000000 | C | 5.443448000000  | 11.961830000000  | -2.722051000000 |
| C | 4.339743000000  | 12.465254000000  | 3.435380000000  | C | 4.366537000000  | 12.510044000000  | 3.429428000000  |
| C | 3.366441000000  | 12.787253000000  | 2.521604000000  | C | 3.384472000000  | 12.808894000000  | 2.516631000000  |
| C | 3.272268000000  | 12.624147000000  | 0.000000000000  | C | 3.268091000000  | 12.596879000000  | 0.000000000000  |
| C | 3.366441000000  | 12.787253000000  | -2.521604000000 | C | 3.384472000000  | 12.808894000000  | -2.516631000000 |
| C | 4.339743000000  | 12.465254000000  | -3.435380000000 | C | 4.366537000000  | 12.510044000000  | -3.429428000000 |
| H | 4.297565000000  | 12.573830000000  | 4.510111000000  | H | 4.336971000000  | 12.648047000000  | 4.500995000000  |
| H | 2.391603000000  | 13.213321000000  | 2.693934000000  | H | 2.413427000000  | 13.243797000000  | 2.689837000000  |
| C | 1.890074000000  | 12.937528000000  | 0.000000000000  | C | 1.890630000000  | 12.890566000000  | 0.000000000000  |
| H | 2.391603000000  | 13.213321000000  | -2.693934000000 | H | 2.413427000000  | 13.243797000000  | -2.689837000000 |
| H | 4.297565000000  | 12.573830000000  | -4.510111000000 | H | 4.336971000000  | 12.648047000000  | -4.500995000000 |

|                            |                  |                  |                 |                            |                  |                  |                 |
|----------------------------|------------------|------------------|-----------------|----------------------------|------------------|------------------|-----------------|
| C                          | 0.685098000000   | 13.081736000000  | 0.000000000000  | C                          | 0.680949000000   | 13.018283000000  | 0.000000000000  |
| C                          | -0.685098000000  | 13.081736000000  | 0.000000000000  | C                          | -0.680949000000  | 13.018283000000  | 0.000000000000  |
| C                          | -1.890074000000  | 12.937528000000  | 0.000000000000  | C                          | -1.890630000000  | 12.890566000000  | 0.000000000000  |
| C                          | -3.272268000000  | 12.624147000000  | 0.000000000000  | C                          | -3.268091000000  | 12.596879000000  | 0.000000000000  |
| C                          | -3.893149000000  | 12.461692000000  | 1.255905000000  | C                          | -3.898744000000  | 12.455601000000  | 1.256934000000  |
| C                          | -3.893149000000  | 12.461692000000  | -1.255905000000 | C                          | -3.898744000000  | 12.455601000000  | -1.256934000000 |
| C                          | -3.366441000000  | 12.787253000000  | 2.521604000000  | C                          | -3.384472000000  | 12.808894000000  | 2.516631000000  |
| O                          | -5.119608000000  | 11.960825000000  | 1.396507000000  | O                          | -5.126725000000  | 11.956483000000  | 1.395625000000  |
| O                          | -5.119608000000  | 11.960825000000  | -1.396507000000 | O                          | -5.126725000000  | 11.956483000000  | -1.395625000000 |
| C                          | -3.366441000000  | 12.787253000000  | -2.521604000000 | C                          | -3.384472000000  | 12.808894000000  | -2.516631000000 |
| C                          | -4.339743000000  | 12.465254000000  | 3.435380000000  | C                          | -4.366537000000  | 12.510044000000  | 3.429428000000  |
| H                          | -2.391603000000  | 13.213321000000  | 2.693934000000  | H                          | -2.413427000000  | 13.243797000000  | 2.689837000000  |
| C                          | -5.426044000000  | 11.935087000000  | 2.729797000000  | C                          | -5.443448000000  | 11.961830000000  | 2.722051000000  |
| C                          | -5.426044000000  | 11.935087000000  | -2.729797000000 | C                          | -5.443448000000  | 11.961830000000  | -2.722051000000 |
| C                          | -4.339743000000  | 12.465254000000  | -3.435380000000 | C                          | -4.366537000000  | 12.510044000000  | -3.429428000000 |
| H                          | -2.391603000000  | 13.213321000000  | -2.693934000000 | H                          | -2.413427000000  | 13.243797000000  | -2.689837000000 |
| H                          | -4.297565000000  | 12.573830000000  | 4.510111000000  | H                          | -4.336971000000  | 12.648047000000  | 4.500995000000  |
| C                          | -6.563780000000  | 11.364104000000  | 3.259705000000  | C                          | -6.588961000000  | 11.407732000000  | 3.254786000000  |
| O                          | -7.803679000000  | 10.413160000000  | 1.396495000000  | O                          | -7.796425000000  | 10.417138000000  | 1.395634000000  |
| O                          | -7.803679000000  | 10.413160000000  | -1.396495000000 | O                          | -7.796425000000  | 10.417138000000  | -1.395634000000 |
| C                          | -6.563780000000  | 11.364104000000  | -3.259705000000 | C                          | -6.588961000000  | 11.407732000000  | -3.254786000000 |
| H                          | -4.297565000000  | 12.573830000000  | -4.510111000000 | H                          | -4.336971000000  | 12.648047000000  | -4.500995000000 |
| C                          | -7.627931000000  | 10.665517000000  | 2.729782000000  | C                          | -7.642460000000  | 10.694023000000  | 2.722038000000  |
| C                          | -8.851572000000  | 9.602616000000   | 1.255893000000  | C                          | -8.843636000000  | 9.604472000000   | 1.256943000000  |
| C                          | -8.851572000000  | 9.602616000000   | -1.255893000000 | C                          | -8.843636000000  | 9.604472000000   | -1.256943000000 |
| C                          | -7.627931000000  | 10.665517000000  | -2.729782000000 | C                          | -7.642460000000  | 10.694023000000  | -2.722038000000 |
| C                          | -8.631013000000  | 9.990999000000   | 3.435355000000  | C                          | -8.656527000000  | 10.036811000000  | 3.429406000000  |
| C                          | -9.397259000000  | 9.309928000000   | 2.521574000000  | C                          | -9.407168000000  | 9.336573000000   | 2.516605000000  |
| C                          | -9.303157000000  | 9.146585000000   | 0.000000000000  | C                          | -9.281745000000  | 9.129320000000   | 0.000000000000  |
| C                          | -9.397259000000  | 9.309928000000   | -2.521574000000 | C                          | -9.407168000000  | 9.336573000000   | -2.516605000000 |
| C                          | -8.631013000000  | 9.990999000000   | -3.435355000000 | C                          | -8.656527000000  | 10.036811000000  | -3.429406000000 |
| H                          | -8.746149000000  | 10.008924000000  | 4.510081000000  | H                          | -8.790860000000  | 10.080466000000  | 4.500956000000  |
| H                          | -10.254376000000 | 8.679690000000   | 2.693893000000  | H                          | -10.270107000000 | 8.714154000000   | 2.689812000000  |
| C                          | -10.266558000000 | 8.107111000000   | 0.000000000000  | C                          | -10.225706000000 | 8.084078000000   | 0.000000000000  |
| H                          | -10.254376000000 | 8.679690000000   | -2.693893000000 | H                          | -10.270107000000 | 8.714154000000   | -2.689812000000 |
| H                          | -8.746149000000  | 10.008924000000  | -4.510081000000 | H                          | -8.790860000000  | 10.080466000000  | -4.500956000000 |
| C                          | -10.994610000000 | 7.136176000000   | 0.000000000000  | C                          | -10.941803000000 | 7.100786000000   | 0.000000000000  |
| H                          | -6.605203000000  | -11.435930000000 | -4.341650000000 | H                          | -6.645598000000  | -11.505956000000 | -4.333604000000 |
| H                          | 6.605203000000   | -11.435930000000 | -4.341650000000 | H                          | 6.645598000000   | -11.505956000000 | -4.333604000000 |
| H                          | 13.215668000000  | 0.000000000000   | -4.341447000000 | H                          | 13.296957000000  | 0.000000000000   | -4.333330000000 |
| H                          | 6.605203000000   | 11.435930000000  | -4.341650000000 | H                          | 6.645598000000   | 11.505956000000  | -4.333604000000 |
| H                          | -6.605203000000  | 11.435930000000  | -4.341650000000 | H                          | -6.645598000000  | 11.505956000000  | -4.333604000000 |
| H                          | -13.215668000000 | 0.000000000000   | -4.341447000000 | H                          | -13.296957000000 | 0.000000000000   | -4.333330000000 |
| H                          | 6.605203000000   | 11.435930000000  | 4.341650000000  | H                          | 6.645598000000   | 11.505956000000  | 4.333604000000  |
| H                          | 13.215668000000  | 0.000000000000   | 4.341447000000  | H                          | 13.296957000000  | 0.000000000000   | 4.333330000000  |
| H                          | 6.605203000000   | -11.435930000000 | 4.341650000000  | H                          | 6.645598000000   | -11.505956000000 | 4.333604000000  |
| H                          | -6.605203000000  | -11.435930000000 | 4.341650000000  | H                          | -6.645598000000  | -11.505956000000 | 4.333604000000  |
| H                          | -13.215668000000 | 0.000000000000   | 4.341447000000  | H                          | -13.296957000000 | 0.000000000000   | 4.333330000000  |
| H                          | -6.605203000000  | 11.435930000000  | 4.341650000000  | H                          | -6.645598000000  | 11.505956000000  | 4.333604000000  |
| <b>c-Iso6<sup>4+</sup></b> |                  |                  |                 | <b>c-Iso6<sup>6+</sup></b> |                  |                  |                 |
| C                          | 2.832369000000   | 11.435226000000  | 1.308083000000  | C                          | -12.766986000000 | 2.847726000000   | 1.255774000000  |
| C                          | 3.424216000000   | 11.399276000000  | 2.618863000000  | C                          | -12.873100000000 | 3.470438000000   | 2.507245000000  |
| C                          | 2.428545000000   | 11.595516000000  | 3.502341000000  | C                          | -13.158851000000 | 2.474436000000   | 3.409462000000  |
| C                          | 1.202837000000   | 11.705995000000  | 2.762771000000  | C                          | -13.186272000000 | 1.268063000000   | 2.694898000000  |
| O                          | 1.509543000000   | 11.618123000000  | 1.432744000000  | O                          | -12.958395000000 | 1.533726000000   | 1.384317000000  |
| H                          | 4.477606000000   | 11.270097000000  | 2.810757000000  | H                          | -12.777559000000 | 4.529490000000   | 2.688210000000  |
| H                          | 2.496347000000   | 11.650841000000  | 4.579574000000  | H                          | -13.326360000000 | 2.572252000000   | 4.472851000000  |
| C                          | -0.035585000000  | 11.809865000000  | 3.280834000000  | C                          | -13.313971000000 | 0.000000000000   | 3.227395000000  |
| C                          | -1.340028000000  | 11.781079000000  | 2.712750000000  | C                          | -13.186272000000 | -1.268063000000  | 2.694898000000  |
| C                          | -2.534410000000  | 11.853942000000  | 3.380230000000  | C                          | -13.158851000000 | -2.474436000000  | 3.409462000000  |
| O                          | -1.570731000000  | 11.592079000000  | 1.394853000000  | O                          | -12.958395000000 | -1.533726000000  | 1.384317000000  |
| C                          | -3.544391000000  | 11.692298000000  | 2.412209000000  | C                          | -12.873100000000 | -3.470438000000  | 2.507245000000  |
| H                          | -2.655245000000  | 12.003101000000  | 4.443017000000  | H                          | -13.326360000000 | -2.572252000000  | 4.472851000000  |
| C                          | -2.898193000000  | 11.534177000000  | 1.215086000000  | C                          | -12.766986000000 | -2.847726000000  | 1.255774000000  |
| H                          | -4.612565000000  | 11.700424000000  | 2.559060000000  | H                          | -12.777559000000 | -4.529490000000  | 2.688210000000  |
| C                          | -3.476135000000  | 11.332514000000  | -0.100832000000 | C                          | -12.534760000000 | -3.462924000000  | 0.000000000000  |
| C                          | -2.831097000000  | 11.435513000000  | -1.308202000000 | C                          | -12.766986000000 | -2.847726000000  | -1.255774000000 |
| C                          | -3.422946000000  | 11.399750000000  | -2.618987000000 | C                          | -12.873100000000 | -3.470438000000  | -2.507245000000 |
| O                          | -1.508262000000  | 11.618356000000  | -1.432843000000 | O                          | -12.958395000000 | -1.533726000000  | -1.384317000000 |
| C                          | -2.427266000000  | 11.596047000000  | -3.502442000000 | C                          | -13.158851000000 | -2.474436000000  | -3.409462000000 |
| H                          | -4.476343000000  | 11.270649000000  | -2.810896000000 | H                          | -12.777559000000 | -4.529490000000  | -2.688210000000 |
| C                          | -1.201552000000  | 11.706376000000  | -2.762859000000 | C                          | -13.186272000000 | -1.268063000000  | -2.694898000000 |
| H                          | -2.495067000000  | 11.651505000000  | -4.579668000000 | H                          | -13.326360000000 | -2.572252000000  | -4.472851000000 |
| C                          | 0.036874000000   | 11.810255000000  | -3.280910000000 | C                          | -13.313971000000 | 0.000000000000   | -3.227395000000 |

|   |                  |                  |                 |   |                  |                  |                 |
|---|------------------|------------------|-----------------|---|------------------|------------------|-----------------|
| C | 1.341316000000   | 11.781353000000  | -2.712828000000 | C | -13.186272000000 | 1.268063000000   | -2.694898000000 |
| C | 2.535702000000   | 11.854278000000  | -3.380294000000 | C | -13.158851000000 | 2.474436000000   | -3.409462000000 |
| O | 1.572010000000   | 11.592164000000  | -1.394956000000 | O | -12.958395000000 | 1.533726000000   | -1.384317000000 |
| C | 3.545676000000   | 11.692476000000  | -2.412291000000 | C | -12.873100000000 | 3.470438000000   | -2.507245000000 |
| H | 2.656544000000   | 12.003581000000  | -4.443060000000 | H | -13.326360000000 | 2.572252000000   | -4.472851000000 |
| C | 2.899469000000   | 11.534207000000  | -1.215192000000 | C | -12.766986000000 | 2.847726000000   | -1.255774000000 |
| H | 4.613851000000   | 11.700598000000  | -2.559136000000 | H | -12.777559000000 | 4.529490000000   | -2.688210000000 |
| C | 3.477402000000   | 11.332344000000  | 0.100700000000  | C | -12.534760000000 | 3.462924000000   | 0.000000000000  |
| C | 4.845825000000   | 10.980032000000  | 0.127378000000  | C | -12.068516000000 | 4.781557000000   | 0.000000000000  |
| C | 5.997618000000   | 10.595586000000  | 0.127425000000  | C | -11.544740000000 | 5.884521000000   | 0.000000000000  |
| C | -4.844576000000  | 10.980277000000  | -0.127552000000 | C | -12.068516000000 | -4.781557000000  | 0.000000000000  |
| C | -5.996396000000  | 10.595912000000  | -0.127628000000 | C | -11.544740000000 | -5.884521000000  | 0.000000000000  |
| C | -12.263634000000 | 6.469282000000   | -3.312528000000 | C | -6.656747000000  | -11.529542000000 | -3.227512000000 |
| C | -12.967610000000 | 5.389485000000   | -2.762527000000 | C | -5.494715000000  | -12.052929000000 | -2.695001000000 |
| C | -11.368531000000 | 7.353334000000   | -2.788210000000 | C | -7.691150000000  | -10.785053000000 | -2.694998000000 |
| C | -13.732158000000 | 4.458796000000   | -3.447790000000 | C | -4.436226000000  | -12.632377000000 | -3.409519000000 |
| O | -12.896345000000 | 5.034008000000   | -1.460428000000 | O | -5.150770000000  | -11.988462000000 | -1.384390000000 |
| C | -10.568308000000 | 8.277144000000   | -3.505545000000 | C | -8.722375000000  | -10.158349000000 | -3.409489000000 |
| O | -11.023817000000 | 7.423096000000   | -1.472472000000 | O | -7.807269000000  | -10.454894000000 | -1.384404000000 |
| C | -14.111653000000 | 3.493305000000   | -2.520820000000 | C | -3.430857000000  | -12.882989000000 | -2.507250000000 |
| H | -13.968554000000 | 4.493273000000   | -4.501541000000 | H | -4.435213000000  | -12.826316000000 | -4.472915000000 |
| C | -13.570777000000 | 3.889841000000   | -1.310963000000 | C | -3.917141000000  | -12.479752000000 | -1.255790000000 |
| C | -9.721489000000  | 8.858828000000   | -2.612274000000 | C | -9.442190000000  | -9.413065000000  | -2.507218000000 |
| H | -10.632459000000 | 8.452660000000   | -4.570249000000 | H | -8.890896000000  | -10.254559000000 | -4.472865000000 |
| C | -10.045676000000 | 8.318494000000   | -1.344749000000 | C | -8.849694000000  | -9.632371000000  | -1.255796000000 |
| H | -14.721588000000 | 2.618081000000   | -2.681241000000 | H | -2.465932000000  | -13.329817000000 | -2.688168000000 |
| C | -13.669159000000 | 3.232010000000   | -0.033678000000 | C | -3.268281000000  | -12.586262000000 | 0.000000000000  |
| O | -11.005555000000 | 7.445802000000   | 1.299295000000  | O | -7.807269000000  | -10.454894000000 | 1.384404000000  |
| O | -12.880944000000 | 5.059375000000   | 1.351258000000  | O | -5.150770000000  | -11.988462000000 | -1.384390000000 |
| H | -8.964977000000  | 9.607276000000   | -2.788406000000 | H | -10.311764000000 | -8.801030000000  | -2.688110000000 |
| C | -9.489895000000  | 8.679075000000   | -0.106978000000 | C | -9.266366000000  | -9.123673000000  | 0.000000000000  |
| C | -13.559875000000 | 3.914648000000   | 1.229688000000  | C | -3.917141000000  | -12.479752000000 | 1.255790000000  |
| C | -13.931292000000 | 1.897272000000   | -0.019486000000 | C | -1.893192000000  | -12.841830000000 | 0.000000000000  |
| C | -10.027109000000 | 8.336468000000   | 1.144446000000  | C | -8.849694000000  | -9.632371000000  | 1.255796000000  |
| C | -11.331884000000 | 7.397024000000   | 2.620668000000  | C | -7.691150000000  | -10.785053000000 | 2.694998000000  |
| C | -12.937980000000 | 5.438906000000   | 2.647301000000  | C | -5.494715000000  | -12.052929000000 | 2.695001000000  |
| C | -8.316315000000  | 9.475567000000   | -0.120296000000 | C | -10.175259000000 | -8.060635000000  | 0.000000000000  |
| C | -14.090365000000 | 3.542387000000   | 2.451812000000  | C | -3.430857000000  | -12.882989000000 | 2.507250000000  |
| C | -14.034865000000 | 0.660330000000   | -0.006537000000 | C | -0.676120000000  | -12.939764000000 | 0.000000000000  |
| C | -9.682590000000  | 8.894022000000   | 2.398952000000  | C | -9.442190000000  | -9.413065000000  | 2.507218000000  |
| C | -10.518461000000 | 8.328380000000   | 3.312735000000  | C | -8.722375000000  | -10.158349000000 | 3.409489000000  |
| C | -12.223484000000 | 6.524937000000   | 3.170566000000  | C | -6.656747000000  | -11.529542000000 | 3.227512000000  |
| C | -13.698770000000 | 4.523517000000   | 3.357024000000  | C | -4.436226000000  | -12.632377000000 | 3.409519000000  |
| C | -7.242830000000  | 10.039831000000  | -0.125705000000 | C | -10.868614000000 | -7.055581000000  | 0.000000000000  |
| H | -14.700939000000 | 2.671965000000   | 2.634400000000  | H | -2.465932000000  | -13.329817000000 | 2.688168000000  |
| H | -8.920633000000  | 9.641750000000   | 2.553490000000  | H | -10.311764000000 | -8.801030000000  | 2.688110000000  |
| H | -10.566414000000 | 8.519653000000   | 4.375577000000  | H | -8.890896000000  | -10.254559000000 | 4.472865000000  |
| H | -13.924456000000 | 4.578059000000   | 4.412279000000  | H | -4.435213000000  | -12.826316000000 | 4.472915000000  |
| C | -7.243973000000  | -10.039478000000 | 0.125458000000  | C | 10.868614000000  | -7.055581000000  | 0.000000000000  |
| C | -5.997608000000  | -10.595711000000 | 0.127385000000  | C | 11.544740000000  | -5.884521000000  | 0.000000000000  |
| C | -8.317385000000  | -9.475075000000  | 0.120074000000  | C | 10.175259000000  | -8.060635000000  | 0.000000000000  |
| C | -4.845819000000  | -10.980166000000 | 0.127355000000  | C | 12.068516000000  | -4.781557000000  | 0.000000000000  |
| C | -9.490836000000  | -8.678392000000  | 0.106802000000  | C | 9.266366000000   | -9.123673000000  | 0.000000000000  |
| C | -3.477404000000  | -11.332499000000 | 0.100666000000  | C | 12.534760000000  | -3.462924000000  | 0.000000000000  |
| C | -10.027947000000 | -8.335557000000  | -1.144600000000 | C | 8.849694000000   | -9.632371000000  | -1.255796000000 |
| C | -10.046577000000 | -8.317827000000  | 1.344598000000  | C | 8.849694000000   | -9.632371000000  | 1.255796000000  |
| C | -2.899448000000  | -11.534224000000 | -1.215233000000 | C | 12.766986000000  | -2.847726000000  | -1.255774000000 |
| C | -2.832397000000  | -11.435529000000 | 1.308053000000  | C | 12.766986000000  | -2.847726000000  | 1.255774000000  |
| C | -9.683451000000  | -8.893004000000  | -2.399162000000 | C | 9.442190000000   | -9.413065000000  | -2.507218000000 |
| O | -11.006252000000 | -7.444724000000  | -1.299384000000 | O | 7.807269000000   | -10.454894000000 | -1.384404000000 |
| C | -9.722482000000  | -8.858307000000  | 2.612083000000  | C | 9.442190000000   | -9.413065000000  | 2.507218000000  |
| O | -11.024578000000 | -7.422286000000  | 1.472382000000  | O | 7.807269000000   | -10.454894000000 | 1.384404000000  |
| O | -1.571983000000  | -11.592235000000 | -1.394964000000 | O | 12.958395000000  | -1.533726000000  | -1.384317000000 |
| C | -3.545619000000  | -11.692316000000 | -2.412374000000 | C | 12.873100000000  | -3.470438000000  | -2.507245000000 |
| O | -1.509578000000  | -11.618440000000 | 1.432726000000  | O | 12.958395000000  | -1.533726000000  | 1.384317000000  |
| C | -3.424283000000  | -11.399739000000 | 2.618819000000  | C | 12.873100000000  | -3.470438000000  | 2.507245000000  |
| C | -10.519182000000 | -8.327111000000  | -3.312914000000 | C | 8.722375000000   | -10.158349000000 | -3.409489000000 |
| H | -8.921600000000  | -9.640828000000  | -2.553756000000 | H | 10.311764000000  | -8.801030000000  | -2.688110000000 |
| C | -11.332503000000 | -7.395721000000  | -2.620767000000 | C | 7.691150000000   | -10.785053000000 | -2.694998000000 |
| C | -10.569206000000 | -8.276546000000  | 3.505395000000  | C | 8.722375000000   | -10.158349000000 | 3.409489000000  |
| H | -8.966090000000  | -9.606889000000  | 2.788162000000  | H | 10.311764000000  | -8.801030000000  | 2.688110000000  |
| C | -11.369282000000 | -7.352561000000  | 2.788123000000  | C | 7.691150000000   | -10.785053000000 | 2.694998000000  |
| C | -1.341253000000  | -11.781289000000 | -2.712848000000 | C | 13.186272000000  | -1.268063000000  | -2.694898000000 |
| C | -2.535622000000  | -11.854075000000 | -3.380359000000 | C | 13.158851000000  | -2.474436000000  | -3.409462000000 |

|   |                  |                  |                 |   |                 |                  |                 |
|---|------------------|------------------|-----------------|---|-----------------|------------------|-----------------|
| H | -4.613788000000  | -11.700362000000 | -2.559268000000 | H | 12.777559000000 | -4.529490000000  | -2.688210000000 |
| C | -1.202910000000  | -11.706471000000 | 2.762750000000  | C | 13.186272000000 | -1.268063000000  | 2.694898000000  |
| C | -2.428635000000  | -11.596079000000 | 3.502302000000  | C | 13.158851000000 | -2.474436000000  | 3.409462000000  |
| H | -4.477680000000  | -11.270582000000 | 2.810690000000  | H | 12.777559000000 | -4.529490000000  | 2.688210000000  |
| H | -10.567106000000 | -8.518232000000  | -4.375785000000 | H | 8.890896000000  | -10.254559000000 | -4.472865000000 |
| C | -12.223941000000 | -6.523433000000  | -3.170603000000 | C | 6.656747000000  | -11.529542000000 | -3.227512000000 |
| O | -12.881332000000 | -5.058001000000  | -1.351158000000 | O | 5.150770000000  | -11.988462000000 | -1.384390000000 |
| O | -12.896805000000 | -5.032911000000  | 1.460522000000  | O | 5.150770000000  | -11.988462000000 | -1.384390000000 |
| H | -10.633384000000 | -8.452123000000  | 4.570087000000  | H | 8.890896000000  | -10.254559000000 | 4.472865000000  |
| C | -12.264247000000 | -6.468408000000  | 3.312507000000  | C | 6.656747000000  | -11.529542000000 | 3.227512000000  |
| C | -0.036800000000  | -11.810193000000 | -3.280896000000 | C | 13.313971000000 | 0.000000000000   | -3.227395000000 |
| O | 1.508288000000   | -11.618435000000 | -1.432774000000 | O | 12.958395000000 | 1.533726000000   | -1.384317000000 |
| O | 1.570695000000   | -11.592399000000 | 1.394917000000  | O | 12.958395000000 | 1.533726000000   | 1.384317000000  |
| H | -2.656447000000  | -12.003255000000 | -4.443145000000 | H | 13.326360000000 | -2.572252000000  | -4.472851000000 |
| C | 0.035500000000   | -11.810394000000 | 3.280835000000  | C | 13.313971000000 | 0.000000000000   | 3.227395000000  |
| H | -2.496456000000  | -11.651535000000 | 4.579526000000  | H | 13.326360000000 | -2.572252000000  | 4.472851000000  |
| C | -12.938322000000 | -5.437366000000  | -2.647251000000 | C | 5.494715000000  | -12.052929000000 | -2.695001000000 |
| C | -13.560122000000 | -3.913199000000  | -1.229499000000 | C | 3.917141000000  | -12.479752000000 | -1.255790000000 |
| C | -12.968076000000 | -5.388471000000  | 2.762598000000  | C | 5.494715000000  | -12.052929000000 | 2.695001000000  |
| C | -13.571077000000 | -3.888637000000  | 1.311162000000  | C | 3.917141000000  | -12.479752000000 | 1.255790000000  |
| C | 1.201616000000   | -11.706369000000 | -2.762803000000 | C | 13.186272000000 | 1.268063000000   | -2.694898000000 |
| C | 2.831117000000   | -11.435601000000 | -1.308091000000 | C | 12.766986000000 | 2.847726000000   | -1.255774000000 |
| C | 2.898164000000   | -11.534452000000 | 1.215190000000  | C | 12.766986000000 | 2.847726000000   | 1.255774000000  |
| C | 1.339955000000   | -11.781525000000 | 2.712789000000  | C | 13.186272000000 | 1.268063000000   | 2.694898000000  |
| C | -13.698939000000 | -4.521792000000  | -3.356919000000 | C | 4.436226000000  | -12.632377000000 | -3.409519000000 |
| C | -14.090474000000 | -3.540721000000  | -2.451616000000 | C | 3.430857000000  | -12.882989000000 | -2.507250000000 |
| C | -13.669412000000 | -3.230691000000  | 0.033936000000  | C | 3.268281000000  | -12.586262000000 | 0.000000000000  |
| C | -13.732471000000 | -4.457721000000  | 3.447953000000  | C | 4.436226000000  | -12.632377000000 | 3.409519000000  |
| C | -14.111857000000 | -3.492111000000  | 2.521068000000  | C | 3.430857000000  | -12.882989000000 | 2.507250000000  |
| C | 2.427348000000   | -11.595999000000 | -3.502348000000 | C | 13.158851000000 | 2.474436000000   | -3.409462000000 |
| C | 3.423005000000   | -11.399763000000 | -2.618854000000 | C | 12.873100000000 | 3.470438000000   | -2.507245000000 |
| C | 3.476130000000   | -11.332681000000 | -0.100698000000 | C | 12.534760000000 | 3.462924000000   | 0.000000000000  |
| C | 3.544326000000   | -11.692653000000 | 2.412321000000  | C | 12.873100000000 | 3.470438000000   | 2.507245000000  |
| C | 2.534320000000   | -11.854418000000 | 3.380296000000  | C | 13.158851000000 | 2.474436000000   | 3.409462000000  |
| H | -13.924510000000 | -4.576175000000  | -4.412198000000 | H | 4.435213000000  | -12.826316000000 | -4.474291500000 |
| H | -14.700919000000 | -2.670197000000  | -2.634146000000 | H | 2.465932000000  | -13.329817000000 | -2.688168000000 |
| C | -13.931465000000 | -1.895933000000  | 0.019870000000  | C | 1.893192000000  | -12.841830000000 | 0.000000000000  |
| H | -13.968834000000 | -4.492241000000  | 4.501711000000  | H | 4.435213000000  | -12.826316000000 | 4.472915000000  |
| H | -14.721658000000 | -2.616809000000  | 2.681573000000  | H | 2.465932000000  | -13.329817000000 | 2.688168000000  |
| H | 2.495166000000   | -11.651395000000 | -4.579576000000 | H | 13.326360000000 | 2.572252000000   | -4.472851000000 |
| H | 4.476409000000   | -11.270651000000 | -2.810717000000 | H | 12.777559000000 | 4.529490000000   | -2.688210000000 |
| C | 4.844566000000   | -10.980426000000 | -0.127367000000 | C | 12.068516000000 | 4.781557000000   | 0.000000000000  |
| H | 4.612494000000   | -11.700766000000 | 2.559216000000  | H | 12.777559000000 | 4.529490000000   | 2.688210000000  |
| H | 2.655137000000   | -12.003673000000 | 4.443072000000  | H | 13.326360000000 | 2.572252000000   | 4.472851000000  |
| C | -14.034935000000 | -0.658983000000  | 0.007021000000  | C | 0.676120000000  | -12.939764000000 | 0.000000000000  |
| C | 5.996372000000   | -10.596016000000 | -0.127419000000 | C | 11.544740000000 | 5.884521000000   | 0.000000000000  |
| C | 7.242792000000   | -10.039906000000 | -0.125550000000 | C | 10.868614000000 | 7.055581000000   | 0.000000000000  |
| C | 8.316261000000   | -9.475612000000  | -0.120201000000 | C | 10.175259000000 | 8.060635000000   | 0.000000000000  |
| C | 9.489798000000   | -8.679054000000  | -0.106921000000 | C | 9.266366000000  | 9.123673000000   | 0.000000000000  |
| C | 10.026988000000  | -8.336352000000  | 1.144484000000  | C | 8.849694000000  | 9.632371000000   | 1.255796000000  |
| C | 10.045560000000  | -8.318511000000  | -1.344713000000 | C | 8.849694000000  | 9.632371000000   | -1.255796000000 |
| C | 9.682469000000   | -8.893828000000  | 2.399025000000  | C | 9.442190000000  | 9.413065000000   | 2.507218000000  |
| O | 11.005409000000  | -7.445648000000  | 1.299284000000  | O | 7.807269000000  | 10.454894000000  | 1.384404000000  |
| O | 11.023669000000  | -7.423083000000  | -1.472480000000 | O | 7.807269000000  | 10.454894000000  | -1.384404000000 |
| C | 9.721385000000   | -8.858909000000  | -2.612211000000 | C | 9.442190000000  | 9.413065000000   | -2.507218000000 |
| C | 10.518310000000  | -8.328099000000  | 3.312779000000  | C | 8.722375000000  | 10.158349000000  | 3.409489000000  |
| H | 8.920531000000   | -9.641567000000  | 2.553604000000  | H | 10.311764000000 | 8.801030000000   | 2.688110000000  |
| C | 11.331720000000  | -7.396769000000  | 2.620657000000  | C | 7.691150000000  | 10.785053000000  | 2.694998000000  |
| C | 11.368368000000  | -7.353362000000  | -2.788221000000 | C | 7.691150000000  | 10.785053000000  | -2.694998000000 |
| C | 10.568175000000  | -8.277228000000  | -3.505513000000 | C | 8.722375000000  | 10.158349000000  | -3.409489000000 |
| H | 8.964900000000   | -9.607395000000  | -2.788306000000 | H | 10.311764000000 | 8.801030000000   | -2.688110000000 |
| H | 10.566253000000  | -8.519296000000  | 4.375635000000  | H | 8.890896000000  | 10.254559000000  | 4.472865000000  |
| C | 12.223292000000  | -6.524628000000  | 3.170510000000  | C | 6.656747000000  | 11.529542000000  | 3.227512000000  |
| O | 12.880786000000  | -5.059172000000  | 1.351122000000  | O | 5.150770000000  | 11.988462000000  | 1.384390000000  |
| O | 12.896190000000  | -5.033949000000  | -1.460556000000 | O | 5.150770000000  | 11.988462000000  | -1.384390000000 |
| C | 12.263434000000  | -6.469298000000  | -3.312587000000 | C | 6.656747000000  | 11.529542000000  | -3.227512000000 |
| H | 10.632323000000  | -8.452189000000  | -4.570210000000 | H | 8.890896000000  | 10.254559000000  | -4.472865000000 |
| C | 12.937790000000  | -5.438621000000  | 2.647190000000  | C | 5.494715000000  | 12.052929000000  | 2.695001000000  |
| C | 13.559723000000  | -3.914453000000  | 1.229498000000  | C | 3.917141000000  | 12.479752000000  | 1.255790000000  |
| C | 13.570595000000  | -3.889758000000  | -1.311160000000 | C | 3.917141000000  | 12.479752000000  | -1.255790000000 |
| C | 12.967394000000  | -5.389462000000  | -2.762648000000 | C | 5.494715000000  | 12.052929000000  | -2.695001000000 |
| C | 13.698560000000  | -4.523189000000  | 3.356876000000  | C | 4.436226000000  | 12.632377000000  | 3.409519000000  |
| C | 14.090182000000  | -3.542117000000  | 2.451611000000  | C | 3.430857000000  | 12.882989000000  | 2.507250000000  |
| C | 13.669045000000  | -3.231888000000  | -0.033905000000 | C | 3.268281000000  | 12.586262000000  | 0.000000000000  |

|                 |                  |                  |                 |                              |                  |                  |                 |
|-----------------|------------------|------------------|-----------------|------------------------------|------------------|------------------|-----------------|
| C               | 14.111393000000  | -3.493241000000  | -2.521062000000 | C                            | 3.430857000000   | 12.882989000000  | -2.507250000000 |
| C               | 13.731877000000  | -4.458768000000  | -3.447980000000 | C                            | 4.436226000000   | 12.632377000000  | -3.409519000000 |
| H               | 13.924217000000  | -4.577664000000  | 4.412140000000  | H                            | 4.435213000000   | 12.826316000000  | 4.472915000000  |
| H               | 14.700752000000  | -2.671684000000  | 2.634162000000  | H                            | 2.465932000000   | 13.329817000000  | 2.688168000000  |
| C               | 13.931269000000  | -1.897165000000  | -0.019779000000 | C                            | 1.893192000000   | 12.841830000000  | 0.000000000000  |
| H               | 14.721293000000  | -2.618002000000  | -2.681540000000 | H                            | 2.465932000000   | 13.329817000000  | -2.688168000000 |
| H               | 13.968216000000  | -4.493271000000  | -4.501744000000 | H                            | 4.435213000000   | 12.826316000000  | -4.472915000000 |
| C               | 14.034908000000  | -0.660229000000  | -0.006853000000 | C                            | 0.676120000000   | 12.939764000000  | 0.000000000000  |
| C               | 14.035004000000  | 0.659083000000   | 0.006853000000  | C                            | -0.676120000000  | 12.939764000000  | 0.000000000000  |
| C               | 13.931552000000  | 1.896034000000   | 0.019819000000  | C                            | -1.893192000000  | 12.841830000000  | 0.000000000000  |
| C               | 13.669570000000  | 3.230804000000   | 0.033976000000  | C                            | -3.268281000000  | 12.586262000000  | 0.000000000000  |
| C               | 13.571160000000  | 3.888657000000   | 1.311248000000  | C                            | -3.917141000000  | 12.479752000000  | 1.255790000000  |
| C               | 13.560439000000  | 3.913438000000   | -1.229408000000 | C                            | -3.917141000000  | 12.479752000000  | -1.255790000000 |
| C               | 14.111890000000  | 3.492066000000   | 2.521153000000  | C                            | -3.430857000000  | 12.882989000000  | 2.507250000000  |
| O               | 12.896851000000  | 5.032904000000   | 1.460649000000  | O                            | -5.150770000000  | 11.988462000000  | 1.384390000000  |
| O               | 12.881629000000  | 5.058230000000   | -1.351039000000 | O                            | -5.150770000000  | 11.988462000000  | -1.384390000000 |
| C               | 14.090968000000  | 3.541104000000   | -2.451491000000 | C                            | -3.430857000000  | 12.882989000000  | -2.507250000000 |
| C               | 13.732426000000  | 4.457603000000   | 3.448085000000  | C                            | -4.436226000000  | 12.632377000000  | 3.409519000000  |
| H               | 14.721710000000  | 2.616772000000   | 2.681630000000  | H                            | -2.465932000000  | 13.329817000000  | 2.688168000000  |
| C               | 12.968047000000  | 5.388380000000   | 2.762752000000  | C                            | -5.494715000000  | 12.052929000000  | 2.695001000000  |
| C               | 12.938774000000  | 5.437728000000   | -2.647087000000 | C                            | -5.494715000000  | 12.052929000000  | -2.695001000000 |
| C               | 13.699514000000  | 4.522252000000   | -3.356748000000 | C                            | -4.436226000000  | 12.632377000000  | -3.409519000000 |
| H               | 14.701468000000  | 2.670620000000   | -2.634028000000 | H                            | -2.465932000000  | 13.329817000000  | -2.688168000000 |
| C               | 13.968735000000  | 4.492058000000   | 4.501857000000  | H                            | -4.435213000000  | 12.826316000000  | 4.472915000000  |
| C               | 12.264157000000  | 6.468264000000   | 3.312689000000  | C                            | -6.656747000000  | 11.529542000000  | 3.227512000000  |
| O               | 11.024586000000  | 7.422214000000   | 1.472537000000  | O                            | -7.807269000000  | 10.454894000000  | 1.384404000000  |
| O               | 11.006495000000  | 7.444874000000   | -1.299230000000 | O                            | -7.807269000000  | 10.454894000000  | -1.384404000000 |
| C               | 12.224412000000  | 6.523819000000   | -3.170416000000 | C                            | -6.656747000000  | 11.529542000000  | -3.227512000000 |
| H               | 13.925262000000  | 4.576748000000   | -4.411992000000 | H                            | -4.435213000000  | 12.826316000000  | -4.472915000000 |
| C               | 11.369201000000  | 7.352424000000   | 2.788299000000  | C                            | -7.691150000000  | 10.785053000000  | 2.694998000000  |
| C               | 10.046565000000  | 8.317731000000   | 1.344739000000  | C                            | -8.849694000000  | 9.632371000000   | 1.255796000000  |
| C               | 10.028137000000  | 8.335649000000   | -1.144458000000 | C                            | -8.849694000000  | 9.632371000000   | -1.255796000000 |
| C               | 11.332880000000  | 7.396016000000   | -2.620588000000 | C                            | -7.691150000000  | 10.785053000000  | -2.694998000000 |
| C               | 10.569046000000  | 8.276341000000   | 3.505569000000  | C                            | -8.722375000000  | 10.158349000000  | 3.409489000000  |
| C               | 9.722364000000   | 8.858127000000   | 2.612233000000  | C                            | -9.442190000000  | 9.413065000000   | 2.507218000000  |
| C               | 9.490899000000   | 8.678356000000   | 0.106927000000  | C                            | -9.266366000000  | 9.123673000000   | 0.000000000000  |
| C               | 9.683736000000   | 8.893200000000   | -2.399000000000 | C                            | -9.442190000000  | 9.413065000000   | -2.507218000000 |
| C               | 10.519585000000  | 8.327435000000   | -3.312724000000 | C                            | -8.722375000000  | 10.158349000000  | -3.409489000000 |
| H               | 10.633145000000  | 8.451860000000   | 4.570275000000  | H                            | -8.890896000000  | 10.254559000000  | 4.472865000000  |
| H               | 8.965937000000   | 9.606676000000   | 2.788304000000  | H                            | -10.311764000000 | 8.801030000000   | 2.688110000000  |
| C               | 8.317415000000   | 9.474990000000   | 0.120162000000  | C                            | -10.175259000000 | 8.060635000000   | 0.000000000000  |
| H               | 8.921867000000   | 9.641004000000   | -2.553597000000 | H                            | -10.311764000000 | 8.801030000000   | -2.688110000000 |
| H               | 10.567605000000  | 8.518663000000   | -4.375571000000 | H                            | -8.890896000000  | 10.254559000000  | -4.472865000000 |
| H               | 7.243994000000   | 10.039377000000  | 0.125525000000  | C                            | -10.868614000000 | 7.055581000000   | 0.000000000000  |
| H               | -12.413119000000 | 6.579953000000   | -4.380823000000 | H                            | -6.744252000000  | -11.681128000000 | -4.297895000000 |
| H               | -12.359523000000 | -6.652038000000  | -4.238751000000 | H                            | 6.744252000000   | -11.681128000000 | -4.297895000000 |
| H               | -0.052083000000  | -11.891644000000 | -4.361902000000 | H                            | 13.489069000000  | 0.000000000000   | -4.297776000000 |
| H               | 12.412898000000  | -6.580004000000  | -4.380881000000 | H                            | 6.744252000000   | 11.681128000000  | -4.297895000000 |
| H               | 12.360102000000  | 6.652532000000   | -4.238537000000 | H                            | -6.744252000000  | 11.681128000000  | -4.297895000000 |
| H               | 0.052187000000   | 11.891778000000  | -4.361910000000 | H                            | -13.489069000000 | 0.000000000000   | -4.297776000000 |
| H               | 12.358904000000  | -6.653316000000  | 4.238644000000  | H                            | 6.744252000000   | 11.681128000000  | 4.297895000000  |
| H               | 0.050779000000   | -11.891917000000 | 4.361836000000  | H                            | 13.489069000000  | 0.000000000000   | 4.297776000000  |
| H               | -12.413735000000 | -6.579130000000  | 4.380796000000  | H                            | 6.744252000000   | -11.681128000000 | 4.297895000000  |
| H               | -12.359116000000 | 6.653701000000   | 4.238688000000  | H                            | -6.744252000000  | -11.681128000000 | 4.297895000000  |
| H               | -0.050894000000  | 11.891256000000  | 4.361845000000  | H                            | -13.489069000000 | 0.000000000000   | 4.297776000000  |
| H               | 12.413570000000  | 6.578923000000   | 4.380995000000  | H                            | -6.744252000000  | 11.681128000000  | 4.297895000000  |
| <b>c-P3Iso3</b> |                  |                  |                 | <b>c-P3Iso3<sup>2+</sup></b> |                  |                  |                 |
| C               | -8.682123000000  | -9.713322000000  | 1.281183000000  | C                            | -12.464219000000 | -3.937086000000  | 1.287870000000  |
| C               | -9.165153000000  | -9.344415000000  | 2.588443000000  | C                            | -12.732409000000 | -3.384536000000  | 2.577725000000  |
| C               | -8.426731000000  | -10.017325000000 | 3.486000000000  | C                            | -12.439294000000 | -4.344998000000  | 3.482704000000  |
| C               | -7.433888000000  | -10.769048000000 | 2.761674000000  | C                            | -11.938034000000 | -5.471996000000  | 2.762576000000  |
| O               | -7.651697000000  | -10.571163000000 | 1.429074000000  | O                            | -11.996825000000 | -5.187465000000  | 1.434508000000  |
| H               | -9.986243000000  | -8.666776000000  | 2.762815000000  | H                            | -13.119744000000 | -2.392659000000  | 2.750503000000  |
| H               | -8.509563000000  | -10.000391000000 | 4.563301000000  | H                            | -12.529710000000 | -4.295548000000  | 4.558360000000  |
| C               | -6.419730000000  | -11.471409000000 | 3.297105000000  | C                            | -11.401710000000 | -6.595494000000  | 3.301367000000  |
| C               | -5.263864000000  | -12.092284000000 | 2.733643000000  | C                            | -10.693168000000 | -7.680908000000  | 2.744527000000  |
| C               | -4.247825000000  | -12.719583000000 | 3.402346000000  | C                            | -10.063134000000 | -8.699818000000  | 3.430675000000  |
| O               | -4.970209000000  | -12.034489000000 | 1.418073000000  | O                            | -10.440634000000 | -7.806605000000  | 1.424857000000  |
| C               | -3.274271000000  | -13.047333000000 | 2.434360000000  | C                            | -9.381208000000  | -9.460445000000  | 2.478093000000  |
| H               | -4.209898000000  | -12.901075000000 | 4.466186000000  | H                            | -10.092650000000 | -8.849827000000  | 4.499822000000  |
| C               | -3.766226000000  | -12.602771000000 | 1.238732000000  | C                            | -9.645505000000  | -8.872759000000  | 1.258544000000  |
| H               | -2.328202000000  | -13.543542000000 | 2.581620000000  | H                            | -8.772223000000  | -10.336646000000 | 2.633826000000  |
| C               | -3.149104000000  | -12.679026000000 | -0.073782000000 | C                            | -9.188776000000  | -9.290254000000  | -0.039864000000 |
| C               | -3.752911000000  | -12.471975000000 | -1.280630000000 | C                            | -9.654148000000  | -8.841993000000  | -1.253393000000 |

|    |                  |                  |                 |    |                  |                  |                 |
|----|------------------|------------------|-----------------|----|------------------|------------------|-----------------|
| C  | -3.185411000000  | -12.690039000000 | -2.587815000000 | C  | -9.345776000000  | -9.372858000000  | -2.547732000000 |
| O  | -5.022731000000  | -12.041652000000 | -1.428734000000 | O  | -10.520655000000 | -7.821710000000  | -1.394363000000 |
| C  | -4.144654000000  | -12.411505000000 | -3.485564000000 | C  | -10.067138000000 | -8.667249000000  | -3.442660000000 |
| H  | -2.178491000000  | -13.035803000000 | -2.762027000000 | H  | -8.675786000000  | -10.199880000000 | -2.724282000000 |
| C  | -5.304722000000  | -11.958425000000 | -2.761391000000 | C  | -10.782211000000 | -7.658363000000  | -2.718712000000 |
| H  | -4.086487000000  | -12.472506000000 | -4.562886000000 | H  | -10.103617000000 | -8.792167000000  | -4.515348000000 |
| C  | -6.433344000000  | -11.460503000000 | -3.296931000000 | C  | -11.516956000000 | -6.656913000000  | -3.255175000000 |
| C  | -7.567037000000  | -10.800027000000 | -2.733452000000 | C  | -12.102814000000 | -5.493011000000  | -2.700220000000 |
| C  | -8.632563000000  | -10.261110000000 | -3.402202000000 | C  | -12.716699000000 | -4.467260000000  | -3.385525000000 |
| O  | -7.671825000000  | -10.520513000000 | -1.417705000000 | O  | -12.037076000000 | -5.182514000000  | -1.389836000000 |
| C  | -9.421237000000  | -9.603173000000  | -2.434039000000 | C  | -13.015838000000 | -3.479294000000  | -2.440000000000 |
| H  | -8.806644000000  | -10.322783000000 | -4.466170000000 | H  | -12.905754000000 | -4.444904000000  | -4.448486000000 |
| C  | -8.785634000000  | -9.791188000000  | -1.238282000000 | C  | -12.579227000000 | -3.965044000000  | -1.228366000000 |
| H  | -10.338659000000 | -9.055799000000  | -2.581268000000 | H  | -13.496940000000 | -2.527312000000  | -2.599611000000 |
| C  | -9.173698000000  | -9.305855000000  | 0.074426000000  | C  | -12.663642000000 | -3.332403000000  | 0.062323000000  |
| C  | -10.132420000000 | -8.259514000000  | 0.082367000000  | C  | -12.946183000000 | -1.950153000000  | 0.065823000000  |
| C  | -10.848097000000 | -7.280863000000  | 0.069393000000  | C  | -13.040159000000 | -0.738755000000  | 0.053138000000  |
| C  | -1.756028000000  | -12.949811000000 | -0.081399000000 | C  | -8.128115000000  | -10.232283000000 | -0.051214000000 |
| C  | -0.547673000000  | -13.048907000000 | -0.068380000000 | C  | -7.126620000000  | -10.915095000000 | -0.043155000000 |
| C  | 6.558585000000   | -10.961894000000 | -3.390994000000 | C  | 0.039511000000   | -12.732670000000 | -3.390787000000 |
| C  | 7.592770000000   | -10.279357000000 | -2.762318000000 | C  | 1.278917000000   | -12.671271000000 | -2.765988000000 |
| C  | 5.454650000000   | -11.551222000000 | -2.786948000000 | C  | -1.208232000000  | -12.673672000000 | -2.782480000000 |
| C  | 8.640871000000   | -9.570102000000  | -3.444472000000 | C  | 2.540709000000   | -12.604093000000 | -3.452746000000 |
| N  | 7.733032000000   | -10.119168000000 | -1.420001000000 | N  | 1.485184000000   | -12.597716000000 | -1.424535000000 |
| C  | 4.343411000000   | -12.127363000000 | -3.493962000000 | C  | -2.460883000000  | -12.608613000000 | -3.485911000000 |
| N  | 5.223461000000   | -11.610568000000 | -1.449012000000 | N  | -1.432466000000  | -12.600961000000 | -1.443892000000 |
| C  | 9.385266000000   | -8.960218000000  | -2.490549000000 | C  | 3.494816000000   | -12.457072000000 | -2.502562000000 |
| H  | 8.773960000000   | -9.535532000000  | -4.516809000000 | H  | 2.669755000000   | -12.652851000000 | -4.524943000000 |
| C  | 8.805673000000   | -9.319685000000  | -1.222497000000 | C  | 2.815695000000   | -12.461504000000 | -1.232056000000 |
| Zn | 6.471610000000   | -10.881482000000 | -0.001216000000 | Zn | 0.016890000000   | -12.617329000000 | -0.000033000000 |
| C  | 3.435706000000   | -12.499138000000 | -2.558992000000 | C  | -3.427787000000  | -12.463727000000 | -2.548361000000 |
| H  | 4.268658000000   | -12.218290000000 | -4.568663000000 | H  | -2.575549000000  | -12.657363000000 | -4.559746000000 |
| C  | 4.005638000000   | -12.172911000000 | -1.277770000000 | C  | -2.765658000000  | -12.467416000000 | -1.268972000000 |
| H  | 10.251346000000  | -8.328785000000  | -2.619235000000 | H  | 4.562044000000   | -12.365443000000 | -2.636394000000 |
| C  | 9.287113000000   | -8.894864000000  | 0.032956000000  | C  | 3.447791000000   | -12.340554000000 | 0.022644000000  |
| N  | 5.199662000000   | -11.626067000000 | 1.417585000000  | N  | -1.451449000000  | -12.601727000000 | 1.424469000000  |
| N  | 7.709706000000   | -10.135436000000 | 1.446593000000  | N  | 1.466198000000   | -12.597331000000 | 1.443828000000  |
| H  | 2.470394000000   | -12.958623000000 | -2.708548000000 | H  | -4.493359000000  | -12.374512000000 | -2.696241000000 |
| C  | 3.380440000000   | -12.404106000000 | -0.035099000000 | C  | -3.414722000000  | -12.349517000000 | -0.022677000000 |
| C  | 8.785848000000   | -9.334628000000  | 1.275506000000  | C  | 2.799038000000   | -12.460293000000 | 1.268922000000  |
| C  | 10.287817000000  | -7.886261000000  | 0.046523000000  | C  | 4.822535000000   | -11.983467000000 | 0.031260000000  |
| C  | 3.984456000000   | -12.185591000000 | 1.220238000000  | C  | -2.782312000000  | -12.468969000000 | 1.232006000000  |
| C  | 5.408222000000   | -11.580827000000 | 2.759828000000  | C  | -1.244990000000  | -12.674902000000 | 2.765913000000  |
| C  | 7.547763000000   | -10.311343000000 | 2.784454000000  | C  | 1.242156000000   | -12.670786000000 | 2.782408000000  |
| C  | 2.016192000000   | -12.800996000000 | -0.048330000000 | C  | -4.790388000000  | -11.995994000000 | -0.031253000000 |
| C  | 9.345628000000   | -8.991312000000  | 2.556739000000  | C  | 3.461156000000   | -12.455030000000 | 2.548312000000  |
| C  | 11.025657000000  | -6.924332000000  | 0.056486000000  | C  | 5.952775000000   | -11.544750000000 | 0.037856000000  |
| C  | 3.392328000000   | -12.523952000000 | 2.488302000000  | C  | -3.461442000000  | -12.466462000000 | 2.502513000000  |
| C  | 4.284498000000   | -12.162799000000 | 3.442059000000  | C  | -2.506955000000  | -12.611104000000 | 3.452679000000  |
| C  | 6.502600000000   | -10.999605000000 | 3.388432000000  | C  | -0.005429000000  | -12.733125000000 | 3.390707000000  |
| C  | 8.585557000000   | -9.611590000000  | 3.491549000000  | C  | 2.494635000000   | -12.602545000000 | 3.485846000000  |
| C  | 0.818606000000   | -12.989421000000 | -0.058020000000 | C  | -5.921760000000  | -11.560206000000 | -0.037776000000 |
| H  | 10.210873000000  | -8.363403000000  | 2.706419000000  | H  | 4.526492000000   | -12.363059000000 | 2.696201000000  |
| H  | 2.423685000000   | -12.982759000000 | 2.617099000000  | H  | -4.528906000000  | -12.377637000000 | 2.636354000000  |
| H  | 4.191122000000   | -12.264219000000 | 4.514350000000  | H  | -2.635873000000  | -12.660324000000 | 4.524871000000  |
| H  | 8.701768000000   | -9.590442000000  | 4.566206000000  | H  | 2.609429000000   | -12.651125000000 | 4.559674000000  |
| C  | 11.579001000000  | 6.051545000000   | -0.067034000000 | C  | 13.041761000000  | -0.704062000000  | -0.053056000000 |
| C  | 10.844207000000  | 7.204952000000   | -0.056551000000 | C  | 12.994402000000  | 0.655842000000   | -0.042591000000 |
| C  | 12.097415000000  | 4.955553000000   | -0.080132000000 | C  | 12.950987000000  | -1.915706000000  | -0.065643000000 |
| C  | 10.082003000000  | 8.147698000000   | -0.046763000000 | C  | 12.811599000000  | 1.857136000000   | -0.032953000000 |
| C  | 12.559452000000  | 3.613726000000   | -0.072398000000 | C  | 12.672230000000  | -3.298726000000  | -0.062194000000 |
| C  | 9.055739000000   | 9.130289000000   | -0.033503000000 | C  | 12.433536000000  | 3.218609000000   | -0.020797000000 |
| C  | 12.683453000000  | 2.987596000000   | -1.279259000000 | C  | 12.474367000000  | -3.903891000000  | -1.287755000000 |
| C  | 12.800375000000  | 3.040753000000   | 1.240244000000  | C  | 12.589659000000  | -3.931665000000  | 1.228468000000  |
| C  | 8.543106000000   | 9.556370000000   | -1.276175000000 | C  | 12.216087000000  | 3.847069000000   | -1.268394000000 |
| C  | 8.563774000000   | 9.543251000000   | 1.221832000000  | C  | 12.220601000000  | 3.825566000000   | 1.238059000000  |
| C  | 12.590308000000  | 3.588434000000   | -2.586407000000 | C  | 12.740927000000  | -3.350541000000  | -2.577606000000 |
| O  | 12.945711000000  | 1.672743000000   | -1.427346000000 | O  | 12.010416000000  | -5.155550000000  | -1.434417000000 |
| C  | 12.938236000000  | 3.688731000000   | 2.436194000000  | C  | 13.025070000000  | -3.444801000000  | 2.440086000000  |
| O  | 12.909679000000  | 1.713862000000   | 1.419361000000  | O  | 12.050816000000  | -5.150604000000  | 1.389926000000  |
| N  | 7.446726000000   | 10.329189000000  | -1.447465000000 | N  | 11.661032000000  | 5.065575000000   | -1.438381000000 |
| C  | 9.111303000000   | 9.226899000000   | -2.557339000000 | C  | 12.552743000000  | 3.279237000000   | -2.546984000000 |
| N  | 7.470952000000   | 10.314972000000  | 1.419132000000  | N  | 11.668185000000  | 5.041976000000   | 1.430756000000  |
| C  | 9.152644000000   | 9.199470000000   | 2.489956000000  | C  | 12.561663000000  | 3.235636000000   | 2.505530000000  |

|    |                 |                 |                 |    |                 |                  |                 |
|----|-----------------|-----------------|-----------------|----|-----------------|------------------|-----------------|
| C  | 12.829725000000 | 2.618626000000  | -3.484092000000 | C  | 12.450405000000 | -4.311770000000  | -3.482607000000 |
| H  | 12.386679000000 | 4.633411000000  | -2.760613000000 | H  | 13.125505000000 | -2.357590000000  | -2.750368000000 |
| C  | 13.016260000000 | 1.387225000000  | -2.759987000000 | C  | 11.952317000000 | -5.440183000000  | -2.762494000000 |
| C  | 13.139804000000 | 2.681428000000  | 3.404148000000  | C  | 12.728698000000 | -4.433623000000  | 3.385586000000  |
| H  | 12.895025000000 | 4.756127000000  | 2.583689000000  | H  | 13.503613000000 | -2.491531000000  | 2.599701000000  |
| C  | 13.105025000000 | 1.488046000000  | 2.735093000000  | C  | 12.117522000000 | -5.460993000000  | 2.700286000000  |
| C  | 7.280081000000  | 10.500195000000 | -2.785384000000 | C  | 11.616650000000 | 5.302180000000   | -2.776696000000 |
| Zn | 6.190061000000  | 11.043811000000 | 0.000197000000  | Zn | 10.943382000000 | 6.323261000000   | 0.008596000000  |
| C  | 8.335394000000  | 9.826980000000  | -3.492319000000 | C  | 12.194235000000 | 4.192231000000   | -3.482624000000 |
| H  | 9.992355000000  | 8.621333000000  | -2.706861000000 | H  | 13.014017000000 | 2.314991000000   | -2.697468000000 |
| C  | 7.326827000000  | 10.472166000000 | 2.761396000000  | C  | 11.630907000000 | 5.256486000000   | 2.773002000000  |
| C  | 8.392959000000  | 9.790473000000  | 3.443709000000  | C  | 12.209323000000 | 4.133670000000   | 3.457730000000  |
| H  | 10.034717000000 | 8.590614000000  | 2.618801000000  | H  | 13.021018000000 | 2.267826000000   | 2.638054000000  |
| H  | 12.854860000000 | 2.699770000000  | -4.561362000000 | H  | 12.540606000000 | -4.262022000000  | -4.558267000000 |
| C  | 13.149760000000 | 0.160948000000  | -3.295661000000 | C  | 11.419062000000 | -6.565135000000  | -3.301297000000 |
| O  | 12.951860000000 | -1.382040000000 | -1.417120000000 | O  | 10.461402000000 | -7.778934000000  | -1.424778000000 |
| O  | 12.982195000000 | -1.340068000000 | 1.429643000000  | O  | 10.541626000000 | -7.793934000000  | 1.394437000000  |
| H  | 13.276825000000 | 2.804703000000  | 4.468180000000  | H  | 12.917795000000 | -4.410813000000  | 4.448530000000  |
| C  | 13.144192000000 | 0.176440000000  | 3.298257000000  | C  | 11.534864000000 | -6.626503000000  | 3.255234000000  |
| C  | 6.217467000000  | 11.161055000000 | -3.389512000000 | C  | 11.040007000000 | 6.412915000000   | -3.380964000000 |
| N  | 4.899152000000  | 11.754740000000 | -1.418744000000 | N  | 10.188412000000 | 7.587317000000   | -1.413678000000 |
| N  | 4.923780000000  | 11.741235000000 | 1.447860000000  | N  | 10.199151000000 | 7.565925000000   | 1.455363000000  |
| H  | 8.451920000000  | 9.808271000000  | -4.566987000000 | H  | 12.299187000000 | 4.122543000000   | -4.556271000000 |
| C  | 6.275508000000  | 11.128144000000 | 3.389918000000  | C  | 11.060828000000 | 6.358883000000   | 3.398366000000  |
| H  | 8.527081000000  | 9.759884000000  | 4.516039000000  | H  | 12.318859000000 | 4.045685000000   | 4.529565000000  |
| C  | 13.143492000000 | -1.151244000000 | -2.732533000000 | C  | 10.713542000000 | -7.652515000000  | -2.744455000000 |
| C  | 12.876490000000 | -2.711310000000 | -1.238153000000 | C  | 9.669210000000  | -8.847271000000  | -1.258460000000 |
| C  | 13.043194000000 | -1.052856000000 | 2.762390000000  | C  | 10.802805000000 | -7.629923000000  | 2.718777000000  |
| C  | 12.754059000000 | -2.661220000000 | 1.281147000000  | C  | 9.677875000000  | -8.816551000000  | 1.253476000000  |
| C  | 5.108594000000  | 11.714229000000 | -2.760999000000 | C  | 10.360338000000 | 7.450927000000   | -2.755967000000 |
| C  | 3.670004000000  | 12.282961000000 | -1.221457000000 | C  | 9.402404000000  | 8.667324000000   | -1.221401000000 |
| C  | 3.691876000000  | 12.272002000000 | 1.276556000000  | C  | 9.413095000000  | 8.649575000000   | 1.285146000000  |
| C  | 5.156636000000  | 11.688512000000 | 2.785785000000  | C  | 10.380124000000 | 7.408492000000   | 2.794126000000  |
| C  | 13.210141000000 | -2.343321000000 | -3.401500000000 | C  | 10.086286000000 | -8.673138000000  | -3.430602000000 |
| C  | 13.032979000000 | -3.355502000000 | -2.433854000000 | C  | 9.406484000000  | -9.435654000000  | -2.478011000000 |
| C  | 12.648204000000 | -3.290313000000 | 0.074085000000  | C  | 9.213667000000  | -9.266038000000  | 0.039955000000  |
| C  | 12.887190000000 | -2.288659000000 | 3.486214000000  | C  | 10.090499000000 | -8.640761000000  | 3.442728000000  |
| C  | 12.674222000000 | -3.264276000000 | 2.588161000000  | C  | 9.370998000000  | -9.348285000000  | 2.547813000000  |
| C  | 3.970172000000  | 12.266780000000 | -3.443324000000 | C  | 9.670419000000  | 8.508967000000   | -3.440798000000 |
| C  | 3.069170000000  | 12.605356000000 | -2.489588000000 | C  | 9.060623000000  | 9.256912000000   | -2.489068000000 |
| C  | 3.060770000000  | 12.486502000000 | 0.033876000000  | C  | 8.976839000000  | 9.150376000000   | 0.037210000000  |
| C  | 3.113940000000  | 12.584072000000 | 2.557718000000  | C  | 9.081768000000  | 9.220485000000   | 2.564034000000  |
| C  | 4.031051000000  | 12.236205000000 | 3.492714000000  | C  | 9.697146000000  | 8.457218000000   | 3.499930000000  |
| H  | 13.352070000000 | -2.463008000000 | -4.465298000000 | H  | 10.116177000000 | -8.823045000000  | -4.499752000000 |
| H  | 13.017530000000 | -4.423657000000 | -2.581388000000 | H  | 8.799905000000  | -10.313522000000 | -2.633741000000 |
| C  | 12.220821000000 | -4.643576000000 | 0.081170000000  | C  | 8.155573000000  | -10.210947000000 | 0.051324000000  |
| H  | 12.912625000000 | -2.369148000000 | 4.563526000000  | H  | 10.127366000000 | -8.765614000000  | 4.515410000000  |
| H  | 12.497203000000 | -4.314138000000 | 2.762068000000  | H  | 8.703251000000  | -10.177118000000 | 2.724370000000  |
| H  | 3.874056000000  | 12.365251000000 | -4.515648000000 | H  | 9.650874000000  | 8.649302000000   | -4.512486000000 |
| H  | 2.089041000000  | 13.039062000000 | -2.618447000000 | H  | 8.445982000000  | 10.134287000000  | -2.621878000000 |
| C  | 1.686800000000  | 12.848310000000 | 0.047090000000  | C  | 7.979192000000  | 10.151197000000  | 0.047960000000  |
| H  | 2.137159000000  | 13.018660000000 | 2.707223000000  | H  | 8.469771000000  | 10.096865000000  | 2.714460000000  |
| H  | 3.954158000000  | 12.325711000000 | 4.567384000000  | H  | 9.685681000000  | 8.581217000000   | 4.573752000000  |
| C  | 11.730645000000 | -5.752478000000 | 0.067551000000  | C  | 7.155926000000  | -10.896460000000 | 0.043283000000  |
| C  | 0.484803000000  | 13.006165000000 | 0.056817000000  | C  | 7.026574000000  | 10.905441000000  | 0.055030000000  |
| C  | -0.882547000000 | 13.030851000000 | 0.067343000000  | C  | 5.868160000000  | 11.620024000000  | 0.060583000000  |
| C  | -2.087989000000 | 12.901057000000 | 0.080536000000  | C  | 4.772478000000  | 12.144723000000  | 0.067598000000  |
| C  | -3.473645000000 | 12.594579000000 | 0.072987000000  | C  | 3.433904000000  | 12.592226000000  | 0.056265000000  |
| C  | -4.071974000000 | 12.372410000000 | 1.279871000000  | C  | 2.807527000000  | 12.748473000000  | 1.277550000000  |
| C  | -4.088541000000 | 12.502081000000 | -1.239530000000 | C  | 2.844392000000  | 12.813849000000  | -1.237084000000 |
| C  | -3.510311000000 | 12.605366000000 | 2.587005000000  | C  | 3.417676000000  | 12.729709000000  | 2.569277000000  |
| O  | -5.330297000000 | 11.909573000000 | 1.428057000000  | O  | 1.492159000000  | 12.977244000000  | 1.415858000000  |
| O  | -5.277539000000 | 11.903045000000 | -1.418741000000 | O  | 1.521656000000  | 12.958425000000  | -1.401049000000 |
| C  | -3.608071000000 | 12.958706000000 | -2.435283000000 | C  | 3.486166000000  | 12.922358000000  | -2.452765000000 |
| C  | -4.462072000000 | 12.302415000000 | 3.484810000000  | C  | 2.438594000000  | 12.980776000000  | 3.466741000000  |
| H  | -2.512639000000 | 12.977010000000 | 2.761141000000  | H  | 4.469317000000  | 12.568144000000  | 2.747306000000  |
| C  | -5.610066000000 | 11.819415000000 | 2.760731000000  | C  | 1.213820000000  | 13.100628000000  | 2.741465000000  |
| C  | -5.572503000000 | 11.952852000000 | -2.734344000000 | C  | 1.286616000000  | 13.148462000000  | -2.716275000000 |
| C  | -4.572841000000 | 12.605771000000 | -3.403208000000 | C  | 2.485095000000  | 13.146519000000  | -3.400929000000 |
| H  | -2.675016000000 | 13.478940000000 | -2.582664000000 | H  | 4.550840000000  | 12.852484000000  | -2.609719000000 |
| H  | -4.405516000000 | 12.365151000000 | 4.562118000000  | H  | 2.524852000000  | 13.057914000000  | 4.541146000000  |
| C  | -6.725470000000 | 11.292656000000 | 3.296377000000  | C  | -0.027390000000 | 13.218934000000  | 3.274398000000  |
| O  | -7.939338000000 | 10.320675000000 | 1.417360000000  | O  | -1.556156000000 | 12.954194000000  | 1.401295000000  |
| O  | -7.920488000000 | 10.371186000000 | -1.429422000000 | O  | -1.526715000000 | 12.973288000000  | -1.415611000000 |

|                              |                  |                  |                 |                              |                  |                  |                 |
|------------------------------|------------------|------------------|-----------------|------------------------------|------------------|------------------|-----------------|
| C                            | -6.712015000000  | 11.302330000000  | -3.297659000000 | C                            | -0.007819000000  | 13.219195000000  | -3.274133000000 |
| H                            | -4.539502000000  | 12.787793000000  | -4.467111000000 | H                            | 2.600716000000   | 13.279329000000  | -4.466503000000 |
| C                            | -7.841746000000  | 10.603026000000  | 2.733056000000  | C                            | -1.321628000000  | 13.144771000000  | 2.716533000000  |
| C                            | -9.033966000000  | 9.562826000000   | 1.238116000000  | C                            | -2.878502000000  | 12.806098000000  | 1.237317000000  |
| C                            | -8.928533000000  | 9.487178000000   | -1.281335000000 | C                            | -2.841463000000  | 12.740974000000  | -1.277320000000 |
| C                            | -7.707809000000  | 10.574281000000  | -2.762065000000 | C                            | -1.248707000000  | 13.097511000000  | -2.741210000000 |
| C                            | -8.892977000000  | 10.036901000000  | 3.401949000000  | C                            | -2.520099000000  | 13.139588000000  | 3.401184000000  |
| C                            | -9.664453000000  | 9.358669000000   | 2.433935000000  | C                            | -3.520565000000  | 12.912814000000  | 2.453003000000  |
| C                            | -9.409441000000  | 9.067426000000   | -0.074483000000 | C                            | -3.467419000000  | 12.582976000000  | -0.056045000000 |
| C                            | -9.401921000000  | 9.105696000000   | -2.588516000000 | C                            | -3.451558000000  | 12.720651000000  | -2.569050000000 |
| C                            | -8.681000000000  | 9.797131000000   | -3.486223000000 | C                            | -2.473154000000  | 12.974415000000  | -3.466495000000 |
| H                            | -9.068538000000  | 10.094232000000  | 4.465916000000  | H                            | -2.636075000000  | 13.272016000000  | 4.466768000000  |
| H                            | -10.567427000000 | 8.787811000000   | 2.581303000000  | H                            | -4.585048000000  | 12.840086000000  | 2.609951000000  |
| C                            | -10.340892000000 | 7.996736000000   | -0.082222000000 | C                            | -4.804789000000  | 12.131889000000  | -0.067391000000 |
| H                            | -10.205335000000 | 8.407155000000   | -2.762743000000 | H                            | -4.502761000000  | 12.556270000000  | -2.747092000000 |
| H                            | -8.763361000000  | 9.777834000000   | -4.563520000000 | H                            | -2.559620000000  | 13.051397000000  | -4.540894000000 |
| C                            | -11.031157000000 | 7.000001000000   | -0.069054000000 | C                            | -5.899055000000  | 11.604243000000  | -0.060369000000 |
| C                            | -11.662976000000 | 5.787127000000   | -0.058388000000 | C                            | -7.055390000000  | 10.886540000000  | -0.054845000000 |
| C                            | -12.098622000000 | 4.655788000000   | -0.048332000000 | C                            | -8.006147000000  | 10.129762000000  | -0.047850000000 |
| C                            | -12.436922000000 | 3.275844000000   | -0.034516000000 | C                            | -9.001170000000  | 9.126327000000   | -0.037233000000 |
| C                            | -12.548602000000 | 2.643827000000   | 1.221073000000  | C                            | -9.425654000000  | 8.642218000000   | 1.221338000000  |
| C                            | -12.550120000000 | 2.618432000000   | -1.276928000000 | C                            | -9.435931000000  | 8.624327000000   | -1.285208000000 |
| C                            | -12.544802000000 | 3.326168000000   | 2.488941000000  | C                            | -9.085618000000  | 9.232765000000   | 2.489027000000  |
| N                            | -12.671090000000 | 1.311686000000   | 1.418894000000  | N                            | -10.208842000000 | 7.560154000000   | 1.413548000000  |
| N                            | -12.671838000000 | 1.282518000000   | -1.447685000000 | N                            | -10.219107000000 | 7.538604000000   | -1.455490000000 |
| C                            | -12.548832000000 | 3.274745000000   | -2.558345000000 | C                            | -9.105922000000  | 9.196050000000   | -2.564075000000 |
| C                            | -12.677092000000 | 2.373182000000   | 3.443072000000  | C                            | -9.693590000000  | 8.483264000000   | 3.440701000000  |
| H                            | -12.458046000000 | 4.394504000000   | 2.617366000000  | H                            | -8.473315000000  | 10.111766000000  | 2.621889000000  |
| C                            | -12.735071000000 | 1.108806000000   | 2.761245000000  | C                            | -10.380612000000 | 7.423375000000   | 2.625817000000  |
| Zn                           | -12.662879000000 | -0.162560000000  | 0.000521000000  | Zn                           | -10.960255000000 | 6.294038000000   | -0.008778000000 |
| C                            | -12.736989000000 | 1.052209000000   | -2.785507000000 | C                            | -10.399474000000 | 7.380636000000   | -2.794272000000 |
| C                            | -12.681194000000 | 2.302450000000   | -3.492928000000 | C                            | -9.719160000000  | 8.431128000000   | -3.500024000000 |
| H                            | -12.464488000000 | 4.340447000000   | -2.708288000000 | H                            | -8.496209000000  | 10.074028000000  | -2.714452000000 |
| H                            | -12.717450000000 | 2.505053000000   | 4.515358000000  | H                            | -9.674580000000  | 8.623704000000   | 4.512385000000  |
| C                            | -12.777999000000 | -0.129393000000  | 3.390241000000  | C                            | -11.057628000000 | 6.383598000000   | 3.380761000000  |
| N                            | -12.634191000000 | -1.607383000000  | 1.448718000000  | N                            | -11.674802000000 | 5.034531000000   | 1.438150000000  |
| N                            | -12.634056000000 | -1.636540000000  | -1.417864000000 | N                            | -11.681480000000 | 5.010791000000   | -1.430986000000 |
| C                            | -12.778722000000 | -0.198681000000  | -3.389150000000 | C                            | -11.077313000000 | 6.329207000000   | -3.398567000000 |
| H                            | -12.723422000000 | 2.412329000000   | -4.567629000000 | H                            | -9.707866000000  | 8.555109000000   | -4.573850000000 |
| C                            | -12.704557000000 | -1.378814000000  | 2.786568000000  | C                            | -11.631243000000 | 5.271320000000   | 2.776461000000  |
| C                            | -12.478455000000 | -2.939755000000  | 1.277894000000  | C                            | -12.226638000000 | 3.814569000000   | 1.268139000000  |
| C                            | -12.477442000000 | -2.965110000000  | -1.220105000000 | C                            | -12.230734000000 | 3.792944000000   | -1.238313000000 |
| C                            | -12.703817000000 | -1.435378000000  | -2.760183000000 | C                            | -11.644572000000 | 5.225338000000   | -2.773236000000 |
| C                            | -12.616450000000 | -2.627212000000  | 3.493962000000  | C                            | -12.206016000000 | 4.159885000000   | 3.482356000000  |
| C                            | -12.459755000000 | -3.595812000000  | 2.559304000000  | C                            | -12.561995000000 | 3.245914000000   | 2.546704000000  |
| C                            | -12.349069000000 | -3.594061000000  | 0.035440000000  | C                            | -12.442264000000 | 3.185491000000   | 0.020538000000  |
| C                            | -12.456765000000 | -3.647139000000  | -2.487977000000 | C                            | -12.570066000000 | 3.202066000000   | -2.505809000000 |
| C                            | -12.613804000000 | -2.697854000000  | -3.442047000000 | C                            | -12.219939000000 | 4.100977000000   | -3.457998000000 |
| H                            | -12.655317000000 | -2.738125000000  | 4.568684000000  | H                            | -12.310947000000 | 4.089972000000   | 4.555990000000  |
| H                            | -12.348109000000 | -4.659009000000  | 2.709194000000  | H                            | -13.020765000000 | 2.280470000000   | 2.697164000000  |
| C                            | -11.975494000000 | -4.964875000000  | 0.049096000000  | C                            | -12.816774000000 | 1.823039000000   | 0.032694000000  |
| H                            | -12.342762000000 | -4.712905000000  | -2.616450000000 | H                            | -13.026864000000 | 2.233051000000   | -2.638356000000 |
| H                            | -12.651257000000 | -2.830719000000  | -4.514315000000 | H                            | -12.329088000000 | 4.012658000000   | -4.529846000000 |
| C                            | -11.510921000000 | -6.084647000000  | 0.058981000000  | C                            | -12.996398000000 | 0.621268000000   | 0.042478000000  |
| H                            | 6.588623000000   | -10.991314000000 | -4.474127000000 | H                            | 0.046755000000   | -12.781588000000 | -4.473498000000 |
| H                            | 13.209383000000  | 0.156167000000   | -4.377976000000 | H                            | 11.484413000000  | -6.607707000000  | -4.382398000000 |
| H                            | 6.228336000000   | 11.202336000000  | -4.472620000000 | H                            | 11.083212000000  | 6.448666000000   | -4.463443000000 |
| H                            | -6.737167000000  | 11.355802000000  | -4.380013000000 | H                            | -0.001751000000  | 13.323073000000  | -4.353056000000 |
| H                            | -12.820108000000 | -0.210307000000  | -4.472246000000 | H                            | -11.126937000000 | 6.347268000000   | -4.481209000000 |
| H                            | -6.466813000000  | -11.508392000000 | -4.379322000000 | H                            | -11.621813000000 | -6.714655000000  | -4.332309000000 |
| H                            | -6.760173000000  | 11.339919000000  | 4.378757000000  | H                            | -0.033737000000  | 13.322711000000  | 4.353330000000  |
| H                            | 6.304987000000   | 11.155892000000  | 4.473029000000  | H                            | 11.110564000000  | 6.377121000000   | 4.481000000000  |
| H                            | 13.201921000000  | 0.182731000000   | 4.380667000000  | H                            | 11.639945000000  | -6.684003000000  | 4.332358000000  |
| H                            | 6.514702000000   | -11.041111000000 | 4.471518000000  | H                            | -0.012547000000  | -12.782187000000 | 4.473412000000  |
| H                            | -6.443529000000  | -11.525811000000 | 4.379445000000  | H                            | -11.467008000000 | -6.638286000000  | 4.382463000000  |
| H                            | -12.819154000000 | -0.118817000000  | 4.473357000000  | H                            | -11.101091000000 | 6.419289000000   | 4.463233000000  |
| <b>c-P3Iso3<sup>4+</sup></b> |                  |                  |                 | <b>c-P3Iso3<sup>6+</sup></b> |                  |                  |                 |
| C                            | 12.397932000000  | -4.579453000000  | 1.262756000000  | C                            | -5.034004000000  | 12.372224000000  | 1.249126000000  |
| C                            | 12.357754000000  | -5.203056000000  | 2.530543000000  | C                            | -4.568121000000  | 12.812563000000  | 2.497803000000  |
| C                            | 12.786325000000  | -4.273449000000  | 3.431647000000  | C                            | -5.566495000000  | 12.545052000000  | 3.398921000000  |
| C                            | 13.036701000000  | -3.081652000000  | 2.713738000000  | C                            | -6.595854000000  | 11.904165000000  | 2.684997000000  |
| O                            | 12.809963000000  | -3.314978000000  | 1.397042000000  | O                            | -6.253474000000  | 11.835743000000  | 1.382834000000  |
| H                            | 12.067317000000  | -6.226830000000  | 2.708070000000  | H                            | -3.617984000000  | 13.293292000000  | 2.675517000000  |
| H                            | 12.903809000000  | -4.389459000000  | 4.499810000000  | H                            | -5.578865000000  | 12.757512000000  | 4.458832000000  |



|    |                  |                 |                 |    |                  |                  |                 |
|----|------------------|-----------------|-----------------|----|------------------|------------------|-----------------|
| C  | 13.343432000000  | -1.857560000000 | 3.248657000000  | C  | -7.726469000000  | 11.320220000000  | 3.226039000000  |
| C  | 13.405809000000  | -0.577812000000 | 2.702678000000  | C  | -8.682454000000  | 10.480370000000  | 2.685001000000  |
| C  | 13.539439000000  | 0.620102000000  | 3.403828000000  | C  | -9.654504000000  | 9.755495000000   | 3.398941000000  |
| O  | 13.222287000000  | -0.304288000000 | 1.391579000000  | O  | -8.743664000000  | 10.136692000000  | 1.382819000000  |
| C  | 13.396264000000  | 1.640326000000  | 2.483054000000  | C  | -10.267673000000 | 8.923449000000   | 2.497811000000  |
| H  | 13.707945000000  | 0.707054000000  | 4.467632000000  | H  | -9.847751000000  | 9.844410000000   | 4.458872000000  |
| C  | 13.208402000000  | 1.024872000000  | 1.247072000000  | C  | -9.687857000000  | 9.196791000000   | 1.249106000000  |
| H  | 13.438094000000  | 2.704944000000  | 2.652021000000  | H  | -11.061715000000 | 8.213970000000   | 2.675522000000  |
| C  | 13.051903000000  | 1.654176000000  | -0.020822000000 | C  | -10.043358000000 | 8.643917000000   | -0.000089000000 |
| C  | 13.179310000000  | 1.015354000000  | -1.261772000000 | C  | -9.687787000000  | 9.196676000000   | -1.249314000000 |
| C  | 13.311923000000  | 1.626052000000  | -2.529524000000 | C  | -10.267544000000 | 8.923244000000   | -2.498026000000 |
| O  | 13.229442000000  | -0.313623000000 | -1.395961000000 | O  | -8.743564000000  | 10.136544000000  | -1.383055000000 |
| C  | 13.469941000000  | 0.614563000000  | -3.430518000000 | C  | -9.654307000000  | 9.755195000000   | -3.399193000000 |
| H  | 13.312976000000  | 2.690217000000  | -2.707115000000 | H  | -11.061600000000 | 8.213776000000   | -2.675723000000 |
| C  | 13.384141000000  | -0.600185000000 | -2.712574000000 | C  | -8.682276000000  | 10.480108000000  | -2.685264000000 |
| H  | 13.615125000000  | 0.693911000000  | -4.498627000000 | H  | -9.847502000000  | 9.844021000000   | -4.459141000000 |
| C  | 13.344167000000  | -1.861536000000 | -3.247435000000 | C  | -7.726235000000  | 11.319882000000  | -3.226316000000 |
| C  | 13.053518000000  | -3.109397000000 | -2.701498000000 | C  | -6.595650000000  | 11.903865000000  | -2.685248000000 |
| C  | 12.854298000000  | -4.298173000000 | -3.402663000000 | C  | -5.566222000000  | 12.544646000000  | -3.399168000000 |
| O  | 12.801597000000  | -3.322149000000 | -1.390481000000 | O  | -6.253376000000  | 11.835597000000  | -1.383050000000 |
| C  | 12.436895000000  | -5.240145000000 | -2.482008000000 | C  | -4.567914000000  | 12.812246000000  | -2.498001000000 |
| H  | 12.992974000000  | -4.428001000000 | -4.466406000000 | H  | -5.578507000000  | 12.756970000000  | -4.459107000000 |
| C  | 12.424261000000  | -4.596703000000 | -1.246053000000 | C  | -5.033908000000  | 12.372073000000  | -1.249308000000 |
| H  | 12.185692000000  | -6.275541000000 | -2.651009000000 | H  | -3.617746000000  | 13.292926000000  | -2.675693000000 |
| C  | 12.101009000000  | -5.159060000000 | 0.021740000000  | C  | -4.389542000000  | 12.501598000000  | -0.000072000000 |
| C  | 11.430589000000  | -6.392806000000 | 0.026134000000  | C  | -3.016916000000  | 12.796821000000  | -0.000035000000 |
| C  | 10.711573000000  | -7.375725000000 | 0.022423000000  | C  | -1.799807000000  | 12.861092000000  | 0.000012000000  |
| C  | 12.744759000000  | 3.024278000000  | -0.025395000000 | C  | -10.818760000000 | 7.473417000000   | -0.000055000000 |
| C  | 12.322138000000  | 4.166441000000  | -0.021852000000 | C  | -11.322317000000 | 6.363509000000   | -0.000026000000 |
| C  | 7.754693000000   | 9.964612000000  | -3.388782000000 | C  | -12.423728000000 | -0.937037000000  | -3.387509000000 |
| C  | 6.733518000000   | 10.677080000000 | -2.771626000000 | C  | -12.265436000000 | -2.174090000000  | -2.774367000000 |
| C  | 8.700188000000   | 9.148569000000  | -2.779617000000 | C  | -12.452979000000 | 0.309777000000   | -2.774372000000 |
| C  | 5.710762000000   | 11.409853000000 | -3.464318000000 | C  | -12.134046000000 | -3.423643000000  | -3.473087000000 |
| N  | 6.512841000000   | 10.738883000000 | -1.430464000000 | N  | -12.157432000000 | -2.384240000000  | -1.434189000000 |
| C  | 9.659292000000   | 8.341027000000  | -3.480254000000 | C  | -12.510678000000 | 1.564883000000   | -3.473106000000 |
| N  | 8.820463000000   | 8.943727000000  | -1.439832000000 | N  | -12.377739000000 | 0.533764000000   | -1.434206000000 |
| C  | 4.862809000000   | 11.882982000000 | -2.518273000000 | C  | -11.918401000000 | -4.373795000000  | -2.531917000000 |
| H  | 5.651438000000   | 11.537386000000 | -4.536089000000 | H  | -12.197982000000 | -3.549315000000  | -4.544806000000 |
| C  | 5.387280000000   | 11.457487000000 | -1.247934000000 | C  | -11.944852000000 | -3.702729000000  | -1.257626000000 |
| Zn | 7.683019000000   | 9.855047000000  | -0.000358000000 | Zn | -12.293649000000 | -0.927196000000  | 0.000015000000  |
| C  | 10.330501000000  | 7.631057000000  | -2.540429000000 | C  | -12.440117000000 | 2.536653000000   | -2.531945000000 |
| H  | 9.792897000000   | 8.320051000000  | -4.552724000000 | H  | -12.592756000000 | 1.679520000000   | -4.544826000000 |
| C  | 9.794289000000   | 8.028452000000  | -1.265883000000 | C  | -12.365504000000 | 1.869235000000   | -1.257651000000 |
| H  | 3.974359000000   | 12.479626000000 | -2.658928000000 | H  | -11.777120000000 | -5.433760000000  | -2.678868000000 |
| C  | 4.808503000000   | 11.754123000000 | 0.010736000000  | C  | -11.781712000000 | -4.334648000000  | 0.000029000000  |
| N  | 8.826356000000   | 8.936705000000  | 1.429748000000  | N  | -12.377687000000 | 0.533785000000   | 1.434217000000  |
| N  | 6.521191000000   | 10.735008000000 | 1.439121000000  | N  | -12.157365000000 | -2.384217000000  | 1.434233000000  |
| H  | 11.126786000000  | 6.917397000000  | -2.687831000000 | H  | -12.459573000000 | 3.605813000000   | -2.678911000000 |
| C  | 10.227585000000  | 7.532425000000  | -0.011429000000 | C  | -12.299035000000 | 2.518486000000   | -0.000011000000 |
| C  | 5.395446000000   | 11.455358000000 | 1.265149000000  | C  | -11.944806000000 | -3.702711000000  | 1.257679000000  |
| C  | 3.521042000000   | 12.322754000000 | 0.015203000000  | C  | -11.360726000000 | -5.678316000000  | 0.000035000000  |
| C  | 9.798432000000   | 8.021170000000  | 1.247257000000  | C  | -12.365437000000 | 1.869253000000   | 1.257641000000  |
| C  | 8.712479000000   | 9.135669000000  | 2.770956000000  | C  | -12.452842000000 | 0.309818000000   | 2.774390000000  |
| C  | 6.749234000000   | 10.668574000000 | 2.778851000000  | C  | -12.265323000000 | -2.174050000000  | 2.774412000000  |
| C  | 11.093766000000  | 6.423196000000  | -0.015870000000 | C  | -12.084339000000 | 3.910113000000   | -0.000026000000 |
| C  | 4.879003000000   | 11.878083000000 | 2.539678000000  | C  | -11.918322000000 | -4.373762000000  | 2.531977000000  |
| C  | 2.361268000000   | 12.694365000000 | 0.018628000000  | C  | -10.895483000000 | -6.805094000000  | 0.000051000000  |
| C  | 10.339392000000  | 7.616793000000  | 2.517607000000  | C  | -12.439956000000 | 2.536690000000   | 2.531932000000  |
| C  | 9.673265000000   | 8.323290000000  | 3.463635000000  | C  | -12.510473000000 | 1.564934000000   | 3.473111000000  |
| C  | 7.771888000000   | 9.951469000000  | 3.388060000000  | C  | -12.423576000000 | -0.936988000000  | 3.387545000000  |
| C  | 5.731635000000   | 11.400968000000 | 3.479507000000  | C  | -12.133924000000 | -3.423596000000  | 3.473143000000  |
| C  | 11.737695000000  | 5.389453000000  | -0.019132000000 | C  | -11.793321000000 | 5.093910000000   | -0.000028000000 |
| H  | 3.992222000000   | 12.475574000000 | 2.687093000000  | H  | -11.777048000000 | -5.433726000000  | 2.678936000000  |
| H  | 11.135286000000  | 6.901333000000  | 2.658254000000  | H  | -12.459382000000 | 3.605852000000   | 2.678884000000  |
| H  | 9.811518000000   | 8.297061000000  | 4.535398000000  | H  | -12.592483000000 | 1.679587000000   | 4.544834000000  |
| H  | 5.678622000000   | 11.525387000000 | 4.551976000000  | H  | -12.197825000000 | -3.549254000000  | 4.544865000000  |
| C  | -9.769539000000  | 8.586602000000  | -0.022101000000 | C  | 0.149770000000   | -12.985464000000 | -0.000065000000 |
| C  | -10.536825000000 | 7.469169000000  | -0.019243000000 | C  | 1.484760000000   | -12.758470000000 | -0.000073000000 |
| C  | -8.991372000000  | 9.523393000000  | -0.025715000000 | C  | -1.063196000000  | -13.104525000000 | -0.000054000000 |
| C  | -11.110542000000 | 6.394885000000  | -0.015872000000 | C  | 2.655471000000   | -12.418618000000 | -0.000076000000 |
| C  | -7.958151000000  | 10.474202000000 | -0.021200000000 | C  | -2.464593000000  | -13.018509000000 | 0.000005000000  |
| C  | -11.638394000000 | 5.090244000000  | -0.011313000000 | C  | 3.968033000000   | -11.908817000000 | -0.000067000000 |
| C  | -7.468490000000  | 10.903587000000 | -1.262071000000 | C  | -3.121166000000  | -12.987211000000 | -1.249183000000 |
| C  | -7.491343000000  | 10.924351000000 | 1.246830000000  | C  | -3.121062000000  | -12.987077000000 | 1.249246000000  |

|    |                  |                 |                 |    |                  |                  |                 |
|----|------------------|-----------------|-----------------|----|------------------|------------------|-----------------|
| C  | -11.851515000000 | 4.466939000000  | -1.265700000000 | C  | 4.563546000000   | -11.641808000000 | -1.257713000000 |
| C  | -11.847183000000 | 4.474385000000  | 1.247433000000  | C  | 4.563551000000   | -11.641832000000 | 1.257584000000  |
| C  | -8.063540000000  | 10.712722000000 | -2.529956000000 | C  | -2.594463000000  | -13.352563000000 | -2.497889000000 |
| O  | -6.342613000000  | 11.611479000000 | -1.396354000000 | O  | -4.407322000000  | -12.639758000000 | -1.382889000000 |
| C  | -8.118300000000  | 10.779606000000 | 2.482686000000  | C  | -2.594240000000  | -13.352264000000 | 2.497951000000  |
| O  | -6.346933000000  | 11.600569000000 | 1.391310000000  | O  | -4.407216000000  | -12.639648000000 | 1.383021000000  |
| N  | -12.157545000000 | 3.165967000000  | -1.439537000000 | N  | 5.726332000000   | -10.984878000000 | -1.434278000000 |
| C  | -11.775389000000 | 5.129872000000  | -2.540285000000 | C  | 4.022743000000   | -12.039900000000 | -2.532004000000 |
| N  | -12.154302000000 | 3.174830000000  | 1.430062000000  | N  | 5.726350000000   | -10.984925000000 | 1.434157000000  |
| C  | -11.767300000000 | 5.145145000000  | 2.517701000000  | C  | 4.022747000000   | -12.040028000000 | 2.531872000000  |
| C  | -7.266577000000  | 11.355097000000 | -3.430969000000 | C  | -3.621643000000  | -13.237792000000 | -3.399015000000 |
| H  | -8.985623000000  | 10.181468000000 | -2.707492000000 | H  | -1.582943000000  | -13.685257000000 | -2.675615000000 |
| C  | -6.171639000000  | 11.888400000000 | -2.713049000000 | C  | -4.735530000000  | -12.758650000000 | -2.685076000000 |
| C  | -7.306024000000  | 11.413460000000 | 3.403533000000  | C  | -3.621349000000  | -13.237420000000 | 3.399151000000  |
| H  | -9.061382000000  | 10.283889000000 | 2.651705000000  | H  | -1.582690000000  | -13.684896000000 | 2.675625000000  |
| C  | -6.201755000000  | 11.896255000000 | 2.702379000000  | C  | -4.735311000000  | -12.758398000000 | 2.685248000000  |
| C  | -12.274882000000 | 2.959318000000  | -2.779271000000 | C  | 5.957908000000   | -10.938056000000 | -2.774447000000 |
| Zn | -12.378211000000 | 1.725436000000  | 0.000082000000  | Zn | 6.949706000000   | -10.181874000000 | -0.000055000000 |
| C  | -12.054876000000 | 4.193567000000  | -3.480028000000 | C  | 4.899655000000   | -11.615347000000 | -3.473175000000 |
| H  | -11.555261000000 | 6.176243000000  | -2.687796000000 | H  | 3.106443000000   | -12.591241000000 | -2.678965000000 |
| C  | -12.269666000000 | 2.976899000000  | 2.771261000000  | C  | 5.957932000000   | -10.938131000000 | 2.774325000000  |
| C  | -12.046262000000 | 4.215145000000  | 3.463827000000  | C  | 4.899670000000   | -11.615417000000 | 3.473046000000  |
| H  | -11.545407000000 | 6.192101000000  | 2.658258000000  | H  | 3.106438000000   | -12.591264000000 | 2.678827000000  |
| H  | -7.407789000000  | 11.440913000000 | -4.499111000000 | H  | -3.601969000000  | -13.449597000000 | -4.458948000000 |
| C  | -5.059385000000  | 12.484317000000 | -3.247982000000 | C  | -5.940934000000  | -12.350906000000 | -3.226109000000 |
| O  | -3.523065000000  | 12.744979000000 | -1.391087000000 | O  | -7.124157000000  | -11.333448000000 | -1.382843000000 |
| O  | -3.533351000000  | 12.748786000000 | 1.396547000000  | O  | -7.124062000000  | -11.333348000000 | 1.383084000000  |
| H  | -7.465533000000  | 11.515960000000 | 4.467336000000  | H  | -3.601583000000  | -13.449088000000 | 4.459109000000  |
| C  | -5.061947000000  | 12.481878000000 | 3.248327000000  | C  | -5.940681000000  | -12.350630000000 | 3.226342000000  |
| C  | -12.509072000000 | 1.732409000000  | -3.388343000000 | C  | 7.023174000000   | -10.289521000000 | -3.387592000000 |
| N  | -12.558769000000 | 0.269988000000  | -1.429894000000 | N  | 8.143596000000   | -9.335618000000  | -1.434261000000 |
| N  | -12.559521000000 | 0.279414000000  | 1.439700000000  | N  | 8.143614000000   | -9.335665000000  | 1.434165000000  |
| H  | -12.103509000000 | 4.319677000000  | -4.552507000000 | H  | 4.841367000000   | -11.743708000000 | -4.544897000000 |
| C  | -12.506073000000 | 1.754472000000  | 3.388506000000  | C  | 7.023215000000   | -10.289628000000 | 3.387479000000  |
| H  | -12.092605000000 | 4.348096000000  | 4.535580000000  | H  | 4.841386000000   | -11.743796000000 | 4.544766000000  |
| C  | -3.833293000000  | 12.856757000000 | -2.702081000000 | C  | -7.012120000000  | -11.664030000000 | -2.685029000000 |
| C  | -2.230640000000  | 13.055738000000 | -1.246676000000 | C  | -8.198699000000  | -10.545878000000 | -1.249087000000 |
| C  | -3.848637000000  | 12.828152000000 | 2.713335000000  | C  | -7.011925000000  | -11.663826000000 | 2.685289000000  |
| C  | -2.232230000000  | 13.024014000000 | 1.262149000000  | C  | -8.198621000000  | -10.545796000000 | 1.249348000000  |
| C  | -12.615657000000 | 0.491920000000  | -2.771110000000 | C  | 8.015530000000   | -9.534156000000  | -2.774445000000 |
| C  | -12.618454000000 | -1.064018000000 | -1.247274000000 | C  | 9.179291000000   | -8.492446000000  | -1.257697000000 |
| C  | -12.620628000000 | -1.055657000000 | 1.265875000000  | C  | 9.179315000000   | -8.492497000000  | 1.257614000000  |
| C  | -12.615982000000 | 0.510277000000  | 2.779446000000  | C  | 8.015574000000   | -9.534257000000  | 2.774343000000  |
| C  | -2.704369000000  | 13.278806000000 | -3.403241000000 | C  | -8.081964000000  | -11.093245000000 | -3.398922000000 |
| C  | -1.679842000000  | 13.388565000000 | -2.482521000000 | C  | -8.813026000000  | -10.362647000000 | -2.497753000000 |
| C  | -1.581983000000  | 13.056976000000 | 0.021233000000  | C  | -8.633100000000  | -10.052599000000 | 0.000129000000  |
| C  | -2.691044000000  | 13.206909000000 | 3.431211000000  | C  | -8.081730000000  | -11.093007000000 | 3.399213000000  |
| C  | -1.671860000000  | 13.300563000000 | 2.530090000000  | C  | -8.812864000000  | -10.362484000000 | 2.498044000000  |
| C  | -12.739061000000 | -0.760261000000 | -3.463674000000 | C  | 9.032091000000   | -8.795745000000  | -3.473164000000 |
| C  | -12.724857000000 | -1.731087000000 | -2.517548000000 | C  | 9.747259000000   | -8.134066000000  | -2.531991000000 |
| C  | -12.585933000000 | -1.713495000000 | 0.011484000000  | C  | 9.645088000000   | -8.035324000000  | -0.000038000000 |
| C  | -12.728561000000 | -1.714162000000 | 2.540466000000  | C  | 9.747315000000   | -8.134176000000  | 2.531912000000  |
| C  | -12.741590000000 | -0.737124000000 | 3.480203000000  | C  | 9.032159000000   | -8.795887000000  | 3.473071000000  |
| H  | -2.661311000000  | 13.463816000000 | -4.466983000000 | H  | -8.259719000000  | -11.210148000000 | -4.458847000000 |
| H  | -0.657640000000  | 13.688964000000 | -2.651551000000 | H  | -9.704556000000  | -9.780365000000  | -2.675424000000 |
| C  | -0.178256000000  | 13.093409000000 | 0.025550000000  | C  | -9.575223000000  | -9.011610000000  | 0.000124000000  |
| H  | -2.649189000000  | 13.366396000000 | 4.499408000000  | H  | -8.259421000000  | -11.209837000000 | 4.459157000000  |
| H  | -0.639952000000  | 13.560681000000 | 2.707543000000  | H  | -9.704398000000  | -9.780215000000  | 2.675739000000  |
| H  | -12.819935000000 | -0.875494000000 | -4.535429000000 | H  | 9.172859000000   | -8.788251000000  | -4.544887000000 |
| H  | -12.797476000000 | -2.798834000000 | -2.658107000000 | H  | 10.594673000000  | -7.481860000000  | -2.678951000000 |
| C  | -12.434716000000 | -3.112702000000 | 0.016087000000  | C  | 10.598347000000  | -6.999005000000  | -0.000028000000 |
| H  | -12.802731000000 | -2.780862000000 | 2.687980000000  | H  | 10.594741000000  | -7.481988000000  | 2.678883000000  |
| H  | -12.822850000000 | -0.845143000000 | 4.552682000000  | H  | 9.172948000000   | -8.788439000000  | 4.544792000000  |
| C  | 1.032491000000   | 12.962483000000 | 0.021721000000  | C  | -10.239440000000 | -7.989698000000  | 0.000093000000  |
| C  | -12.176653000000 | -4.302940000000 | 0.019541000000  | C  | 11.341588000000  | -6.032733000000  | -0.000022000000 |
| C  | -11.744267000000 | -5.587611000000 | 0.022448000000  | C  | 12.039482000000  | -4.872292000000  | -0.000030000000 |
| C  | -11.252132000000 | -6.701589000000 | 0.026127000000  | C  | 12.592420000000  | -3.786130000000  | -0.000036000000 |
| C  | -10.518604000000 | -7.898857000000 | 0.021607000000  | C  | 13.023024000000  | -2.449778000000  | -0.000042000000 |
| C  | -10.164789000000 | -8.445650000000 | 1.262522000000  | C  | 13.233119000000  | -1.826967000000  | 1.249176000000  |
| C  | -10.193261000000 | -8.459911000000 | -1.246360000000 | C  | 13.233023000000  | -1.826951000000  | -1.249266000000 |
| C  | -10.684544000000 | -8.099037000000 | 2.530450000000  | C  | 13.381582000000  | -2.450612000000  | 2.497839000000  |
| O  | -9.275575000000  | -9.434601000000 | 1.396713000000  | O  | 13.378053000000  | -0.502613000000  | 1.382920000000  |
| O  | -9.277699000000  | -9.423585000000 | -1.390905000000 | O  | 13.377974000000  | -0.502599000000  | -1.383009000000 |
| C  | -10.757134000000 | -8.149457000000 | -2.482117000000 | C  | 13.381364000000  | -2.450585000000  | -2.497948000000 |

|    |                  |                  |                 |    |                  |                  |                 |
|----|------------------|------------------|-----------------|----|------------------|------------------|-----------------|
| C  | -10.093533000000 | -8.934862000000  | 3.431457000000  | C  | 13.648915000000  | -1.452220000000  | 3.398991000000  |
| H  | -11.426003000000 | -7.335708000000  | 2.708072000000  | H  | 13.323009000000  | -3.513835000000  | 2.675522000000  |
| C  | -9.186574000000  | -9.747540000000  | 2.713421000000  | C  | 13.608391000000  | -0.240313000000  | 2.685100000000  |
| C  | -9.219489000000  | -9.748107000000  | -2.701902000000 | C  | 13.608197000000  | -0.240288000000  | -2.685207000000 |
| C  | -10.149733000000 | -8.981698000000  | -3.402933000000 | C  | 13.648631000000  | -1.452187000000  | -3.399116000000 |
| H  | -11.528608000000 | -7.414612000000  | -2.651051000000 | H  | 13.322741000000  | -3.513806000000  | -2.675632000000 |
| H  | -10.252553000000 | -8.978586000000  | 4.499649000000  | C  | 13.839076000000  | -1.547735000000  | 4.458906000000  |
| C  | -8.279678000000  | -10.625034000000 | 3.248248000000  | H  | 13.667729000000  | 1.030800000000   | 3.226175000000  |
| O  | -6.873949000000  | -11.296526000000 | 1.391045000000  | O  | 13.151212000000  | 2.503381000000   | 1.382931000000  |
| O  | -6.885801000000  | -11.297982000000 | -1.396521000000 | O  | 13.151139000000  | 2.503400000000   | -1.382997000000 |
| C  | -8.283718000000  | -10.623470000000 | -3.247958000000 | C  | 13.667510000000  | 1.030828000000   | -3.226283000000 |
| H  | -10.331632000000 | -9.036962000000  | -4.466646000000 | H  | 13.838682000000  | -1.547685000000  | -4.459052000000 |
| C  | -7.202504000000  | -11.318845000000 | 2.702158000000  | C  | 13.418233000000  | 2.278591000000   | 2.685122000000  |
| C  | -5.715907000000  | -11.949044000000 | 1.246415000000  | C  | 12.809155000000  | 3.790981000000   | 1.249193000000  |
| C  | -5.709619000000  | -11.918738000000 | -1.262392000000 | C  | 12.809080000000  | 3.790996000000   | -1.249230000000 |
| C  | -7.211271000000  | -11.288439000000 | -2.713181000000 | C  | 13.418065000000  | 2.278619000000   | -2.685210000000 |
| C  | -6.231863000000  | -12.033518000000 | 3.403175000000  | C  | 13.276319000000  | 3.482841000000   | 3.399042000000  |
| C  | -5.276759000000  | -12.419564000000 | 2.482268000000  | C  | 12.862229000000  | 4.429815000000   | 2.497892000000  |
| C  | -5.092756000000  | -12.128022000000 | -0.021613000000 | C  | 12.508055000000  | 4.375250000000   | -0.000060000000 |
| C  | -5.246819000000  | -12.338479000000 | -2.530354000000 | C  | 12.862057000000  | 4.429835000000   | -2.497931000000 |
| C  | -6.201820000000  | -11.969743000000 | -3.431235000000 | C  | 13.276096000000  | 3.482871000000   | -3.399113000000 |
| H  | -6.240731000000  | -12.223007000000 | 4.466964000000  | H  | 13.449911000000  | 3.605777000000   | 4.458975000000  |
| H  | -4.375671000000  | -12.988099000000 | 2.651135000000  | H  | 12.644681000000  | 5.472189000000   | 2.675584000000  |
| C  | -3.752551000000  | -12.547104000000 | -0.026257000000 | C  | 11.881826000000  | 5.631898000000   | 0.000017000000  |
| H  | -4.325564000000  | -12.871132000000 | -2.707997000000 | H  | 12.644499000000  | 5.472209000000   | -2.675608000000 |
| H  | -6.205619000000  | -12.134925000000 | -4.499380000000 | H  | 13.449614000000  | 3.605821000000   | -4.459056000000 |
| C  | -2.552151000000  | -12.752262000000 | -0.022731000000 | C  | 11.172175000000  | 6.622785000000   | 0.000040000000  |
| C  | -1.200704000000  | -12.857725000000 | -0.019909000000 | C  | 10.308044000000  | 7.665383000000   | 0.000095000000  |
| C  | 0.016473000000   | -12.817093000000 | -0.016551000000 | C  | 9.428278000000   | 8.509229000000   | 0.000132000000  |
| C  | 1.410302000000   | -12.621794000000 | -0.011901000000 | C  | 8.330368000000   | 9.390887000000   | 0.000121000000  |
| C  | 2.047928000000   | -12.494607000000 | 1.246859000000  | C  | 7.801298000000   | 9.773022000000   | 1.257761000000  |
| C  | 2.056695000000   | -12.494648000000 | -1.266221000000 | C  | 7.801330000000   | 9.773030000000   | -1.257532000000 |
| C  | 1.427006000000   | -12.760746000000 | 2.517105000000  | C  | 8.416550000000   | 9.503843000000   | 2.532064000000  |
| N  | 3.326940000000   | -12.110784000000 | 1.429583000000  | N  | 6.650891000000   | 10.451402000000  | 1.434314000000  |
| N  | 3.336410000000   | -12.109175000000 | -1.440001000000 | N  | 6.650916000000   | 10.451390000000  | -1.434110000000 |
| C  | 1.444590000000   | -12.760158000000 | -2.540853000000 | C  | 8.416624000000   | 9.503874000000   | -2.531819000000 |
| C  | 2.371815000000   | -12.537277000000 | 3.463288000000  | C  | 7.610258000000   | 10.050845000000  | 3.473224000000  |
| H  | 0.409360000000   | -13.092056000000 | 2.657604000000  | H  | 9.352165000000   | 8.986060000000   | 2.679042000000  |
| C  | 3.555927000000   | -12.111669000000 | 2.770782000000  | C  | 6.494501000000   | 10.628509000000  | 2.774481000000  |
| Zn | 4.694198000000   | -11.580031000000 | -0.000311000000 | Zn | 5.343646000000   | 11.109120000000  | 0.000088000000  |
| C  | 3.574103000000   | -12.107452000000 | -2.779705000000 | C  | 6.494561000000   | 10.628507000000  | -2.774281000000 |
| C  | 2.395240000000   | -12.534019000000 | -3.480540000000 | C  | 7.610349000000   | 10.050870000000  | -3.472996000000 |
| H  | 0.428352000000   | -13.092710000000 | -2.688423000000 | H  | 9.352255000000   | 8.986112000000   | -2.678775000000 |
| H  | 2.279770000000   | -12.643827000000 | 4.535039000000  | H  | 7.750548000000   | 10.064552000000  | 4.544948000000  |
| C  | 4.732752000000   | -11.705181000000 | 3.388115000000  | C  | 5.400097000000   | 11.226576000000  | 3.387619000000  |
| N  | 6.037080000000   | -11.014066000000 | 1.439376000000  | N  | 4.013674000000   | 11.719627000000  | 1.434289000000  |
| N  | 6.045056000000   | -11.008762000000 | -1.430204000000 | N  | 4.013704000000   | 11.719624000000  | -1.434143000000 |
| C  | 4.753783000000   | -11.696837000000 | -3.388729000000 | C  | 5.400162000000   | 11.226557000000  | -3.387444000000 |
| H  | 2.310398000000   | -12.639161000000 | -4.553027000000 | H  | 7.750670000000   | 10.064590000000  | -4.544716000000 |
| C  | 5.865249000000   | -11.178322000000 | 2.779122000000  | C  | 4.249643000000   | 11.708038000000  | 2.774472000000  |
| C  | 7.223924000000   | -10.399603000000 | 1.265611000000  | C  | 2.765538000000   | 12.194765000000  | 1.257715000000  |
| C  | 7.230244000000   | -10.393598000000 | -1.247511000000 | C  | 2.765555000000   | 12.194742000000  | -1.257595000000 |
| C  | 5.881338000000   | -11.168952000000 | -2.771436000000 | C  | 4.249689000000   | 11.708007000000  | -2.774322000000 |
| C  | 7.008346000000   | -10.663476000000 | 3.479947000000  | C  | 3.101775000000   | 12.218974000000  | 3.473186000000  |
| C  | 7.848098000000   | -10.163824000000 | 2.540258000000  | C  | 2.171118000000   | 12.507334000000  | 2.532005000000  |
| C  | 7.776432000000   | -10.040791000000 | 0.011261000000  | C  | 2.136724000000   | 12.369443000000  | 0.000055000000  |
| C  | 7.861235000000   | -10.152256000000 | -2.517768000000 | C  | 2.171147000000   | 12.507269000000  | -2.531900000000 |
| C  | 7.027566000000   | -10.649839000000 | -3.463938000000 | C  | 3.101821000000   | 12.218906000000  | -3.473062000000 |
| H  | 7.142436000000   | -10.679820000000 | 4.552436000000  | H  | 3.024874000000   | 12.337121000000  | 4.544909000000  |
| H  | 8.809013000000   | -9.694807000000  | 2.687818000000  | H  | 1.182509000000   | 12.914933000000  | 2.678957000000  |
| C  | 8.912791000000   | -9.210480000000  | 0.015916000000  | C  | 0.762570000000   | 12.676628000000  | 0.000043000000  |
| H  | 8.822303000000   | -9.681383000000  | -2.658262000000 | H  | 1.182533000000   | 12.914847000000  | -2.678875000000 |
| H  | 7.167845000000   | -10.662273000000 | -4.535686000000 | H  | 3.024932000000   | 12.337026000000  | -4.544789000000 |
| C  | 9.814834000000   | -8.392215000000  | 0.019413000000  | C  | -0.445885000000  | 12.837005000000  | 0.000030000000  |
| H  | 7.791793000000   | 10.018014000000  | -4.470790000000 | H  | -12.495782000000 | -0.942478000000  | -4.468999000000 |
| H  | -5.114633000000  | 12.627220000000  | -4.321339000000 | H  | -6.025551000000  | -12.526842000000 | -4.292673000000 |
| H  | -12.573897000000 | 1.737774000000   | -4.470350000000 | H  | 7.063860000000   | -10.349152000000 | -4.469086000000 |
| H  | -8.379968000000  | -10.742782000000 | -4.321302000000 | H  | 13.862081000000  | 1.045513000000   | -4.292865000000 |
| H  | 4.781605000000   | -11.755669000000 | -4.470734000000 | H  | 5.431468000000   | 11.291623000000  | -4.468936000000 |
| H  | 13.495755000000  | -1.885227000000  | -4.320760000000 | H  | -7.836229000000  | 11.481098000000  | -4.292892000000 |
| H  | -8.371617000000  | -10.747175000000 | 4.321653000000  | H  | 13.862390000000  | 1.045489000000   | 4.292741000000  |
| H  | -12.569920000000 | 1.767043000000   | 4.470511000000  | H  | 7.063914000000   | -10.349292000000 | 4.468970000000  |
| H  | -5.121546000000  | 12.622552000000  | 4.321746000000  | H  | -6.025200000000  | -12.526463000000 | 4.292930000000  |
| H  | 7.814608000000   | 10.000579000000  | 4.470064000000  | H  | -12.495578000000 | -0.942414000000  | 4.469038000000  |

|   |                 |                  |                |   |                 |                 |                |
|---|-----------------|------------------|----------------|---|-----------------|-----------------|----------------|
| H | 13.495284000000 | -1.876234000000  | 4.322045000000 | H | -7.836553000000 | 11.481545000000 | 4.292589000000 |
| H | 4.753708000000  | -11.766740000000 | 4.470123000000 | H | 5.431384000000  | 11.291651000000 | 4.469112000000 |
